# Supplementary material for: Barrigenol triterpenes from the husks of Xanthoceras sorbifolia Bunge and their antitumor activities
Source: Royal Society of Chemistry journal article supplement (doi:10.1039/c6ra02706g), 2016-01-01

## Barrigenol triterpenes from the husks of *Xanthoceras sorbifolia* Bunge and their antitumor activities

Da Wang<sup>a</sup>, Dan Su<sup>a</sup>, Xian-Zhe Li<sup>a</sup>, Dan Liu<sup>a</sup>, Rong-Gang Xi<sup>b</sup>, Hui-Yuan Gao<sup>a,\*</sup>, Xiao-Bo Wang<sup>b,\*</sup>

<sup>a</sup>*Key Laboratory of Structure-Based Drug Design & Discovery of Ministry of Education, Shenyang Pharmaceutical University, Shenyang 110016, People's Republic of China*

<sup>b</sup>*Department of Pharmacy, 210th Hospital of People's Liberation Army, Dalian, 116021, People's Republic of China*

---

\* Correspondence: Huiyuan Gao, School of Traditional Chinese Materia Medica, Shenyang Pharmaceutical University, Shenyang 110016, P.R.China; E-mail: [sypugaohy@163.com](mailto:sypugaohy@163.com); Fax: +862423986460, Tel: +862423986481.

\* Correspondence: Xiaobo Wang, Department of Pharmacy, 210th Hospital of People's Liberation Army, Dalian, China; E-mail: [wxbenson0653@sina.com](mailto:wxbenson0653@sina.com); Tel: +86-411-85841066; Fax: +86-411-39675460.

| No. | CONTENTS                                                                                                                                                                                                                                                                                                                                                                                                          | page |
|-----|-------------------------------------------------------------------------------------------------------------------------------------------------------------------------------------------------------------------------------------------------------------------------------------------------------------------------------------------------------------------------------------------------------------------|------|
| 1   | Figure S1. <sup>1</sup> H-NMR Spectrum of 3- <i>O</i> -(3'- <i>O</i> -angeloyl)- $\beta$ - <i>D</i> -glucopyranosyl-28- <i>O</i> -[ $\alpha$ - <i>L</i> -rhamnopyranosyl(1 $\rightarrow$ 2)]- $\beta$ - <i>D</i> -glucopyranosyl- 3 $\beta$ , 21 $\beta$ , 22 $\alpha$ , 28-tetrahydroxy-olean-12-ene (1) in C <sub>5</sub> D <sub>5</sub> N.                                                                     | 5    |
| 2   | Figure S2. <sup>13</sup> C-NMR Spectrum of 3- <i>O</i> -(3'- <i>O</i> -angeloyl)- $\beta$ - <i>D</i> -glucopyranosyl-28- <i>O</i> -[ $\alpha$ - <i>L</i> -rhamnopyranosyl(1 $\rightarrow$ 2)]- $\beta$ - <i>D</i> -glucopyranosyl -3 $\beta$ , 21 $\beta$ , 22 $\alpha$ , 28-tetrahydroxy-olean-12-ene (1) in C <sub>5</sub> D <sub>5</sub> N.                                                                    | 6    |
| 3   | Figure S3. HR-ESI-MS Spectrum of 3- <i>O</i> -(3'- <i>O</i> -angeloyl)- $\beta$ - <i>D</i> -glucopyranosyl-28- <i>O</i> -[ $\alpha$ - <i>L</i> -rhamnopyranosyl(1 $\rightarrow$ 2)]- $\beta$ - <i>D</i> - glucopyranosyl-3 $\beta$ , 21 $\beta$ , 22 $\alpha$ , 28-tetrahydroxy-olean-12-ene (1) .                                                                                                                | 7    |
| 4   | Figure S4. HMBC Spectrum of 3- <i>O</i> -(3'- <i>O</i> -angeloyl)- $\beta$ - <i>D</i> -glucopyranosyl-28- <i>O</i> -[ $\alpha$ - <i>L</i> -rhamnopyranosyl(1 $\rightarrow$ 2)]- $\beta$ - <i>D</i> -glucopyranosyl-3 $\beta$ , 21 $\beta$ , 22 $\alpha$ , 28-tetrahydroxy-olean-12-ene (1) in C <sub>5</sub> D <sub>5</sub> N.                                                                                    | 8    |
| 5   | Figure S5. HSQC Spectrum of 3- <i>O</i> -(3'- <i>O</i> -angeloyl)- $\beta$ - <i>D</i> -glucopyranosyl-28- <i>O</i> -[ $\alpha$ - <i>L</i> -rhamnopyranosyl(1 $\rightarrow$ 2)]- $\beta$ - <i>D</i> -glucopyranosyl-3 $\beta$ , 21 $\beta$ , 22 $\alpha$ , 28-tetrahydroxy-olean-12-ene (1) in C <sub>5</sub> D <sub>5</sub> N.                                                                                    | 9    |
| 6   | Figure S6. NOESY Spectrum of 3- <i>O</i> -(3'- <i>O</i> -angeloyl)- $\beta$ - <i>D</i> -glucopyranosyl-28- <i>O</i> -[ $\alpha$ - <i>L</i> -rhamnopyranosyl(1 $\rightarrow$ 2)]- $\beta$ - <i>D</i> -glucopyranosyl- 3 $\beta$ , 21 $\beta$ , 22 $\alpha$ , 28-tetrahydroxy-olean-12-ene (1) in C <sub>5</sub> D <sub>5</sub> N.                                                                                  | 10   |
| 7   | Figure S7. IR Spectrum of 3- <i>O</i> -(3'- <i>O</i> -angeloyl)- $\beta$ - <i>D</i> -glucopyranosyl-28- <i>O</i> -[ $\alpha$ - <i>L</i> -rhamnopyranosyl(1 $\rightarrow$ 2)]- $\beta$ - <i>D</i> - glucopyranosyl-3 $\beta$ , 21 $\beta$ , 22 $\alpha$ , 28-tetrahydroxy-olean-12-ene (1).                                                                                                                        | 11   |
| 8   | Figure S8. <sup>1</sup> H-NMR Spectrum of 3- <i>O</i> -[ $\alpha$ - <i>L</i> -arabinofuranosyl(1 $\rightarrow$ 3)]- $\beta$ - <i>D</i> -galactopyranosyl(1 $\rightarrow$ 2)- $\beta$ - <i>D</i> -6'- <i>n</i> -butyl-glucuronic acid-21- <i>O</i> -epoxyangeloyl-22- <i>O</i> -angeloyl-3 $\beta$ , 16 $\alpha$ , 21 $\beta$ , 22 $\alpha$ , 28-pentahydroxy-olean-12-ene (2) in C <sub>5</sub> D <sub>5</sub> N. | 12   |
| 9   | Figure S9. <sup>13</sup> C-NMR Spectrum of 3- <i>O</i> -[ $\alpha$ - <i>L</i> -arabinofuranosyl(1 $\rightarrow$ 3)]- $\beta$ - <i>D</i> -galactopyranosyl(1 $\rightarrow$ 2)- $\beta$ - <i>D</i> -6'- <i>n</i> -butyl-glucuronic acid-21- <i>O</i> -epoxyangeloyl-22- <i>O</i> -angeloyl-3 $\beta$ , 16 $\alpha$ , 21 $\beta$ , 22 $\alpha$ , 28-pentahydroxy-olean-12-ene (2)in C <sub>5</sub> D <sub>5</sub> N. | 13   |
| 10  | Figure S10. HR-ESI-MS Spectrum of 3- <i>O</i> -[ $\alpha$ - <i>L</i> -arabinofuranosyl(1 $\rightarrow$ 3)]- $\beta$ - <i>D</i> -galactopyranosyl(1 $\rightarrow$ 2)- $\beta$ - <i>D</i> -6'- <i>n</i> -butyl-glucuronic acid-21- <i>O</i> -epoxyangeloyl-22- <i>O</i> -angeloyl-3 $\beta$ , 16 $\alpha$ , 21 $\beta$ , 22 $\alpha$ , 28-pentahydroxy-olean-12-ene (2).                                            | 14   |
| 11  | Figure S11. HMBC Spectrum of 3- <i>O</i> -[ $\alpha$ - <i>L</i> -arabinofuranosyl(1 $\rightarrow$ 3)]- $\beta$ - <i>D</i> -galactopyranosyl(1 $\rightarrow$ 2)- $\beta$ - <i>D</i> -6'- <i>n</i> -butyl-glucuronic acid-21- <i>O</i> -epoxyangeloyl-22- <i>O</i> -angeloyl-3 $\beta$ , 16 $\alpha$ , 21 $\beta$ , 22 $\alpha$ , 28-pentahydroxy-olean-12-ene (2) in C <sub>5</sub> D <sub>5</sub> N.              | 15   |
| 12  | Figure S12. HSQC Spectrum of 3- <i>O</i> -[ $\alpha$ - <i>L</i> -arabinofuranosyl(1 $\rightarrow$ 3)]- $\beta$ - <i>D</i> -galactopyranosyl(1 $\rightarrow$ 2)- $\beta$ - <i>D</i> -6'- <i>n</i> -butyl-glucuronic acid-21- <i>O</i> -epoxyangeloyl-22- <i>O</i> -angeloyl-3 $\beta$ , 16 $\alpha$ , 21 $\beta$ , 22 $\alpha$ , 28-pentahydroxy-olean-12-ene (2) in C <sub>5</sub> D <sub>5</sub> N.              | 16   |
| 13  | Figure S13. NOESY Spectrum of 3- <i>O</i> -[ $\alpha$ - <i>L</i> -arabinofuranosyl(1 $\rightarrow$ 3)]- $\beta$ - <i>D</i> -galactopyranosyl(1 $\rightarrow$ 2)- $\beta$ - <i>D</i> -6'- <i>n</i> -butyl-glucuronic acid-21- <i>O</i> -epoxyangeloyl-22- <i>O</i> -angeloyl-3 $\beta$ , 16 $\alpha$ , 21 $\beta$ , 22 $\alpha$ , 28-pentahydroxy-olean-12-ene (2) in C <sub>5</sub> D <sub>5</sub> N.             | 17   |
| 14  | Figure S14. IR Spectrum of 3- <i>O</i> -[ $\alpha$ - <i>L</i> -arabinofuranosyl(1 $\rightarrow$ 3)]- $\beta$ - <i>D</i> -galactopyranosyl(1 $\rightarrow$ 2)- $\beta$ - <i>D</i> -6'- <i>n</i> -butyl-glucuronic acid-21- <i>O</i> -epoxyangeloyl-22- <i>O</i> -angeloyl-3 $\beta$ , 16 $\alpha$ , 21 $\beta$ , 22 $\alpha$ , 28-pentahydroxy-olean-12-ene (2).                                                   | 18   |
| 15  | Figure S15. <sup>1</sup> H-NMR Spectrum of 6'-methylester- <i>O</i> -Xanifolia-Y5 (3) in C <sub>5</sub> D <sub>5</sub> N.                                                                                                                                                                                                                                                                                         | 19   |
| 16  | Figure S16. <sup>13</sup> C-NMR Spectrum of 6'-methylester- <i>O</i> -Xanifolia-Y5 (3) in C <sub>5</sub> D <sub>5</sub> N.                                                                                                                                                                                                                                                                                        | 20   |
| 17  | Figure S17. HR-ESI-MS Spectrum of 6'-methylester- <i>O</i> -Xanifolia-Y5 (3).                                                                                                                                                                                                                                                                                                                                     | 21   |

---

|    |                                                                                                                                                                                                                                                                                         |    |
|----|-----------------------------------------------------------------------------------------------------------------------------------------------------------------------------------------------------------------------------------------------------------------------------------------|----|
| 18 | Figure S18. HMBC Spectrum of 6'-methylester-O-Xanifolia-Y5 (3) in C <sub>5</sub> D <sub>5</sub> N.                                                                                                                                                                                      | 22 |
| 19 | Figure S19. HSQC Spectrum of 6'-methylester-O-Xanifolia-Y5 (3) in C <sub>5</sub> D <sub>5</sub> N.                                                                                                                                                                                      | 23 |
| 20 | Figure S20. IR Spectrum of 6'-methylester-O-Xanifolia-Y5 (3).                                                                                                                                                                                                                           | 24 |
| 21 | Figure S21. <sup>1</sup> H-NMR Spectrum of 16-O-acetyl-aesculoside G12 (4) in C <sub>5</sub> D <sub>5</sub> N.                                                                                                                                                                          | 25 |
| 22 | Figure S22. <sup>13</sup> C-NMR Spectrum of 16-O-acetyl-aesculoside G12 (4) in C <sub>5</sub> D <sub>5</sub> N.                                                                                                                                                                         | 26 |
| 23 | Figure S23. HR-ESI-MS Spectrum of 16-O-acetyl-aesculoside G12 (4).                                                                                                                                                                                                                      | 27 |
| 24 | Figure S24. HMBC Spectrum of 16-O-acetyl-aesculoside G12 (4) in C <sub>5</sub> D <sub>5</sub> N.                                                                                                                                                                                        | 28 |
| 25 | Figure S25. HSQC Spectrum of 16-O-acetyl-aesculoside G12 (4) in C <sub>5</sub> D <sub>5</sub> N.                                                                                                                                                                                        | 29 |
| 26 | Figure S26. NOESYS Spectrum of 16-O-acetyl-aesculoside G12 (4) in C <sub>5</sub> D <sub>5</sub> N.                                                                                                                                                                                      | 30 |
| 27 | Figure S27. IR Spectrum of 16-O-acetyl-aesculoside G12 (4).                                                                                                                                                                                                                             | 31 |
| 28 | Figure S28. <sup>1</sup> H-NMR Spectrum of 3-O-[α-L-arabinofuranosyl(1→3)]-β-D-galactopyranosyl(1→2)-β-D-6'-methyl-glucuronic acid-21-O-(3''',4'''-O-diangeloyl)-β-D-fucopyranosyl-28-O-acetyl-3β, 16α, 21β, 22α, 28-pentahydroxy-olean-12-ene (5) in C <sub>5</sub> D <sub>5</sub> N.  | 32 |
| 29 | Figure S29. <sup>13</sup> C-NMR Spectrum of 3-O-[α-L-arabinofuranosyl(1→3)]-β-D-galactopyranosyl(1→2)-β-D-6'-methyl-glucuronic acid-21-O-(3''',4'''-O-diangeloyl)-β-D-fucopyranosyl-28-O-acetyl-3β, 16α, 21β, 22α, 28-pentahydroxy-olean-12-ene (5) in C <sub>5</sub> D <sub>5</sub> N. | 33 |
| 30 | Figure S30. HR-ESI-MS Spectrum of 3-O-[α-L-arabinofuranosyl(1→3)]-β-D-galactopyranosyl(1→2)-β-D-6'-methyl-glucuronic acid-21-O-(3''',4'''-O-diangeloyl)-β-D-fucopyranosyl-28-O-acetyl-3β, 16α, 21β, 22α, 28-pentahydroxy-olean-12-ene (5).                                              | 34 |
| 31 | Figure S31. HMBC Spectrum of 3-O-[α-L-arabinofuranosyl(1→3)]-β-D-galactopyranosyl(1→2)-β-D-6'-methyl-glucuronic acid-21-O-(3''',4'''-O-diangeloyl)-β-D-fucopyranosyl-28-O-acetyl-3β, 16α, 21β, 22α, 28-pentahydroxy-olean-12-ene (5) in C <sub>5</sub> D <sub>5</sub> N.                | 35 |
| 32 | Figure S32. HSQC Spectrum of 3-O-[α-L-arabinofuranosyl(1→3)]-β-D-galactopyranosyl(1→2)-β-D-6'-methyl-glucuronic acid-21-O-(3''',4'''-O-diangeloyl)-β-D-fucopyranosyl-28-O-acetyl-3β, 16α, 21β, 22α, 28-pentahydroxy-olean-12-ene (5) in C <sub>5</sub> D <sub>5</sub> N.                | 36 |
| 33 | Figure S33. IR Spectrum of 3-O-[α-L-arabinofuranosyl(1→3)]-β-D-galactopyranosyl(1→2)-β-D-6'-methyl-glucuronic acid-21-O-(3''',4'''-O-diangeloyl)-β-D-fucopyranosyl-28-O-acetyl-3β, 16α, 21β, 22α, 28-pentahydroxy-olean-12-ene (5).                                                     | 37 |
| 34 | Figure S34. <sup>1</sup> H-NMR Spectrum of 6'-methylester-O-Xanifolia-Y2 (6) in C <sub>5</sub> D <sub>5</sub> N.                                                                                                                                                                        | 38 |
| 35 | Figure S35. <sup>13</sup> C-NMR Spectrum of 6'-methylester-O-Xanifolia-Y2 (6) in C <sub>5</sub> D <sub>5</sub> N.                                                                                                                                                                       | 39 |
| 36 | Figure S36. HR-ESI-MS Spectrum of 6'-methylester-O-Xanifolia-Y2 (6).                                                                                                                                                                                                                    | 40 |
| 37 | Figure S37. HMBC Spectrum of 6'-methylester-O-Xanifolia-Y2 (6) in C <sub>5</sub> D <sub>5</sub> N.                                                                                                                                                                                      | 41 |
| 38 | Figure S38. HSQC Spectrum of 6'-methylester-O-Xanifolia-Y2 (6) in C <sub>5</sub> D <sub>5</sub> N.                                                                                                                                                                                      | 42 |
| 39 | Figure S39. IR Spectrum of 6'-methylester-O-Xanifolia-Y2 (6).                                                                                                                                                                                                                           | 43 |
| 40 | Figure S40. <sup>1</sup> H-NMR Spectrum of 6'-methylester-O-Xanifolia-Y8 (7) in C <sub>5</sub> D <sub>5</sub> N.                                                                                                                                                                        | 44 |
| 41 | Figure S41. <sup>13</sup> C-NMR Spectrum of 6'-methylester-O-Xanifolia-Y8 (7) in C <sub>5</sub> D <sub>5</sub> N.                                                                                                                                                                       | 45 |
| 42 | Figure S42. HR-ESI-MS Spectrum of 6'-methylester-O-Xanifolia-Y8 (7).                                                                                                                                                                                                                    | 46 |
| 43 | Figure S43. HMBC Spectrum of 6'-methylester-O-Xanifolia-Y8 (7) in C <sub>5</sub> D <sub>5</sub> N.                                                                                                                                                                                      | 47 |

---

---

|    |                                                                                                     |    |
|----|-----------------------------------------------------------------------------------------------------|----|
| 44 | Figure S44. HSQC Spectrum of 6'-methylester-O-Xanifolia-Y8 (7) in C <sub>5</sub> D <sub>5</sub> N.  | 48 |
| 45 | Figure S45. IR Spectrum of 6'-methylester-O-Xanifolia-Y8 (7).                                       | 49 |
| 46 | Figure S46. <sup>1</sup> H-NMR Spectrum of Xanifolia Y (8) in C <sub>5</sub> D <sub>5</sub> N.      | 50 |
| 47 | Figure S47. <sup>13</sup> C-NMR Spectrum of Xanifolia Y (8) in C <sub>5</sub> D <sub>5</sub> N.     | 51 |
| 48 | Figure S48. <sup>1</sup> H-NMR Spectrum of Xanifolia ACH-Y (9) in C <sub>5</sub> D <sub>5</sub> N.  | 52 |
| 49 | Figure S49. <sup>13</sup> C-NMR Spectrum of Xanifolia ACH-Y (9) in C <sub>5</sub> D <sub>5</sub> N. | 53 |
| 50 | Figure S50. <sup>1</sup> H-NMR Spectrum of Xanifolia Y2 (10) in C <sub>5</sub> D <sub>5</sub> N.    | 54 |
| 51 | Figure S51. <sup>13</sup> C-NMR Spectrum of Xanifolia Y2 (10) in C <sub>5</sub> D <sub>5</sub> N.   | 55 |
| 52 | Figure S52. HR-ESI-MSS pectrum of Xanifolia Y2 (10).                                                | 56 |

---

Figure S1. <sup>1</sup>H-NMR Spectrum of 3-O-(3'-O-angeloyl)-β-D-glucopyranosyl-28-O-[α-L-rhamnopyranosyl(1→2)]-β-D-glucopyranosyl-3β, 21β, 22α, 28-tetrahydroxy-olean-12-ene (1) in C<sub>5</sub>D<sub>5</sub>N.

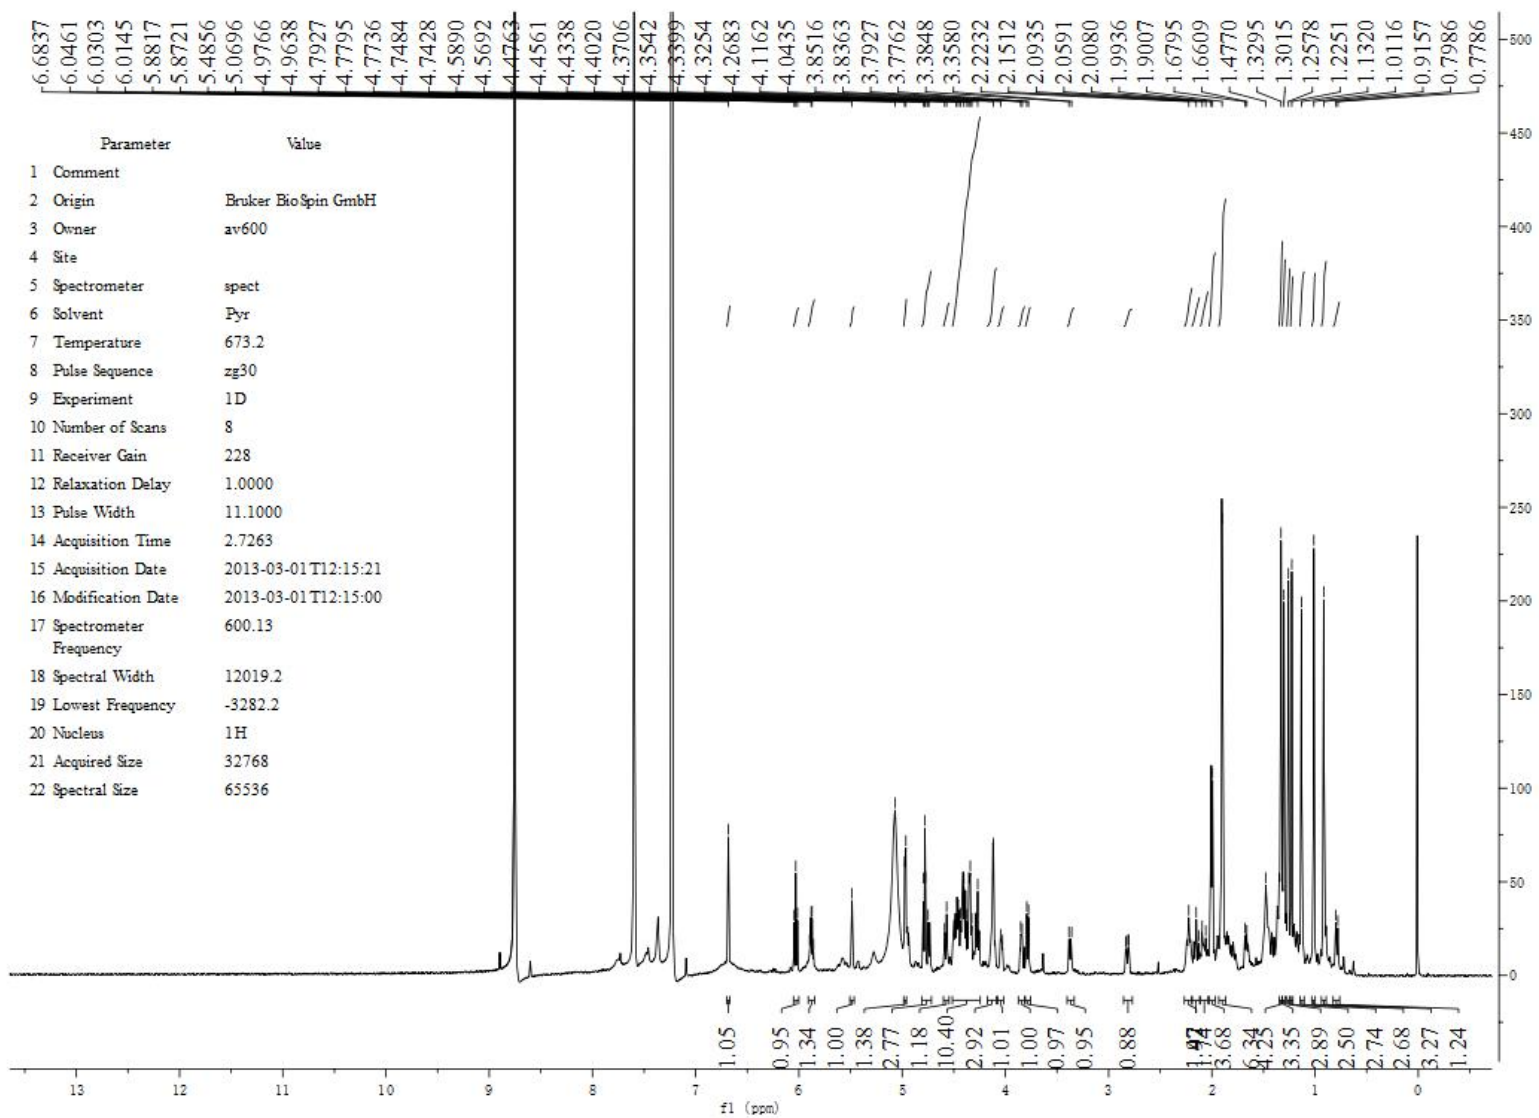

Figure S2.  $^{13}\text{C}$ -NMR Spectrum of 3-*O*-(3'-*O*-angeloyl)- $\beta$ -*D*-glucopyranosyl-28-*O*-[ $\alpha$ -*L*-rhamnopyranosyl(1 $\rightarrow$ 2)]- $\beta$ -*D*-glucopyranosyl-3 $\beta$ , 21 $\beta$ , 22 $\alpha$ , 28-tetrahydroxy-olean-12-ene (1) in  $\text{C}_5\text{D}_5\text{N}$ .

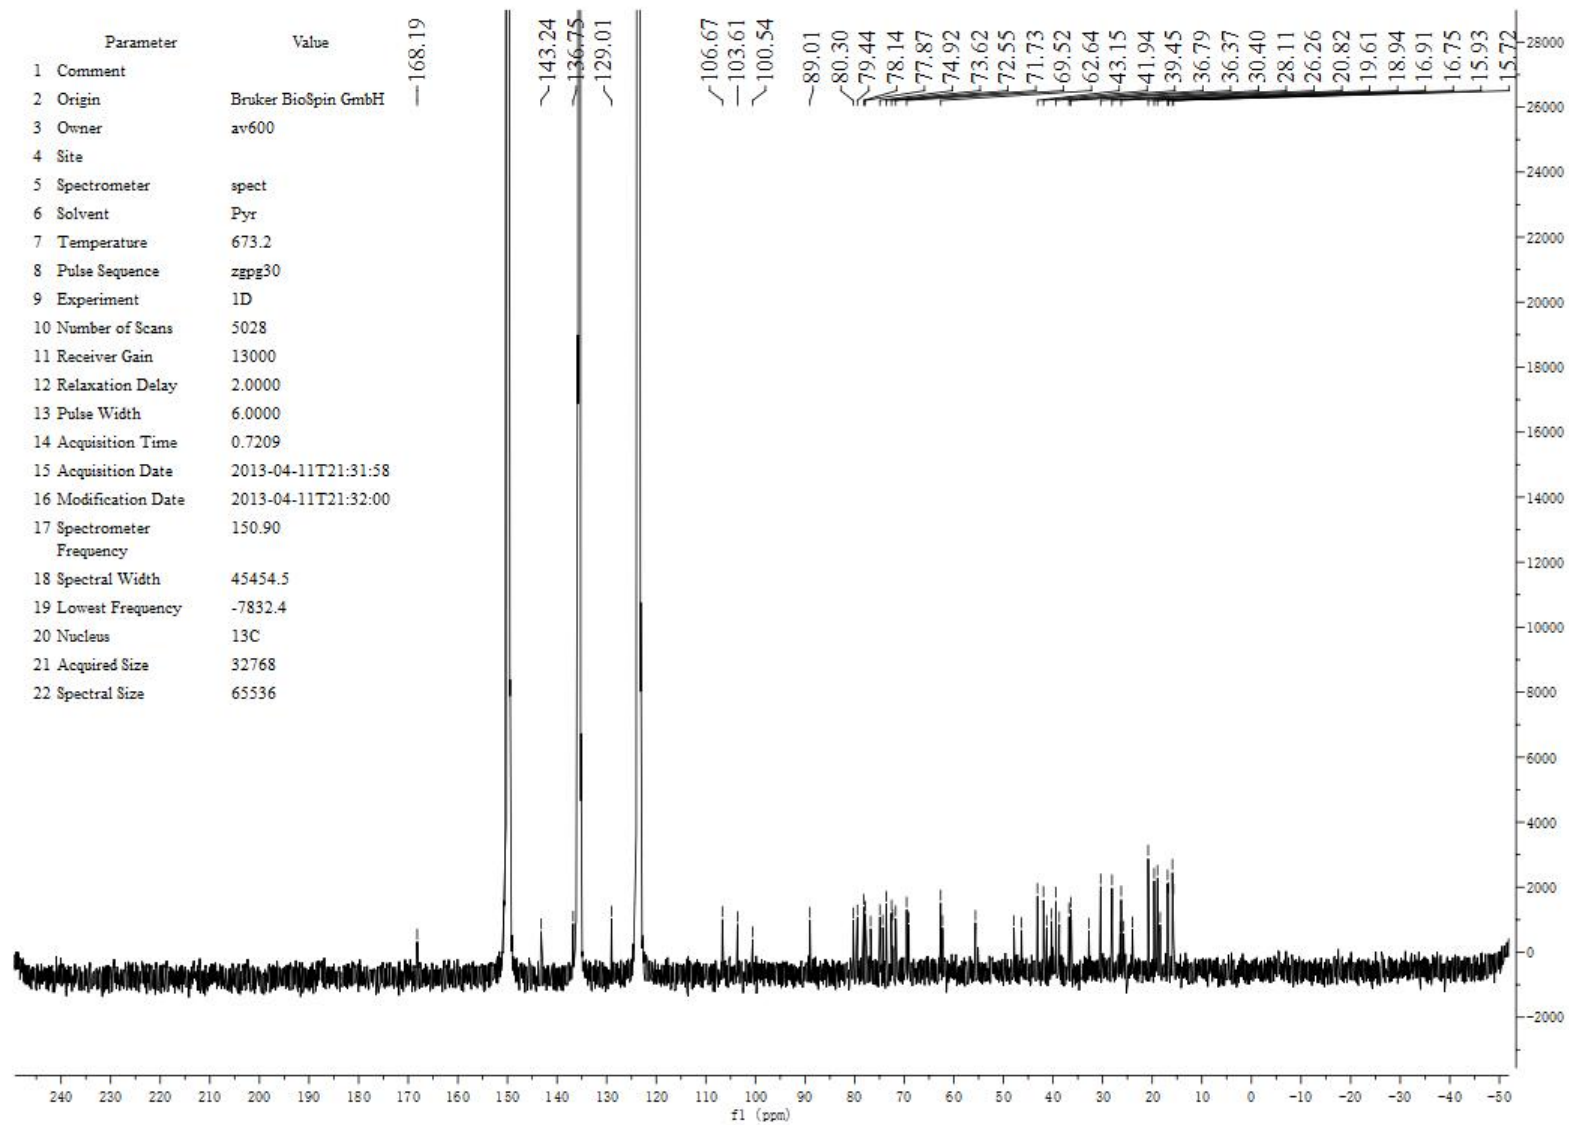

Figure S3. HR-ESI-MS Spectrum of 3-O-(3'-O-angeloyl)- $\beta$ -D-glucopyranosyl-28-O- $[\alpha$ -L-rhamnopyranosyl(1 $\rightarrow$ 2)]- $\beta$ -D-glucopyranosyl-3 $\beta$ , 21 $\beta$ , 22 $\alpha$ , 28-tetrahydro-olean-12-ene (1).

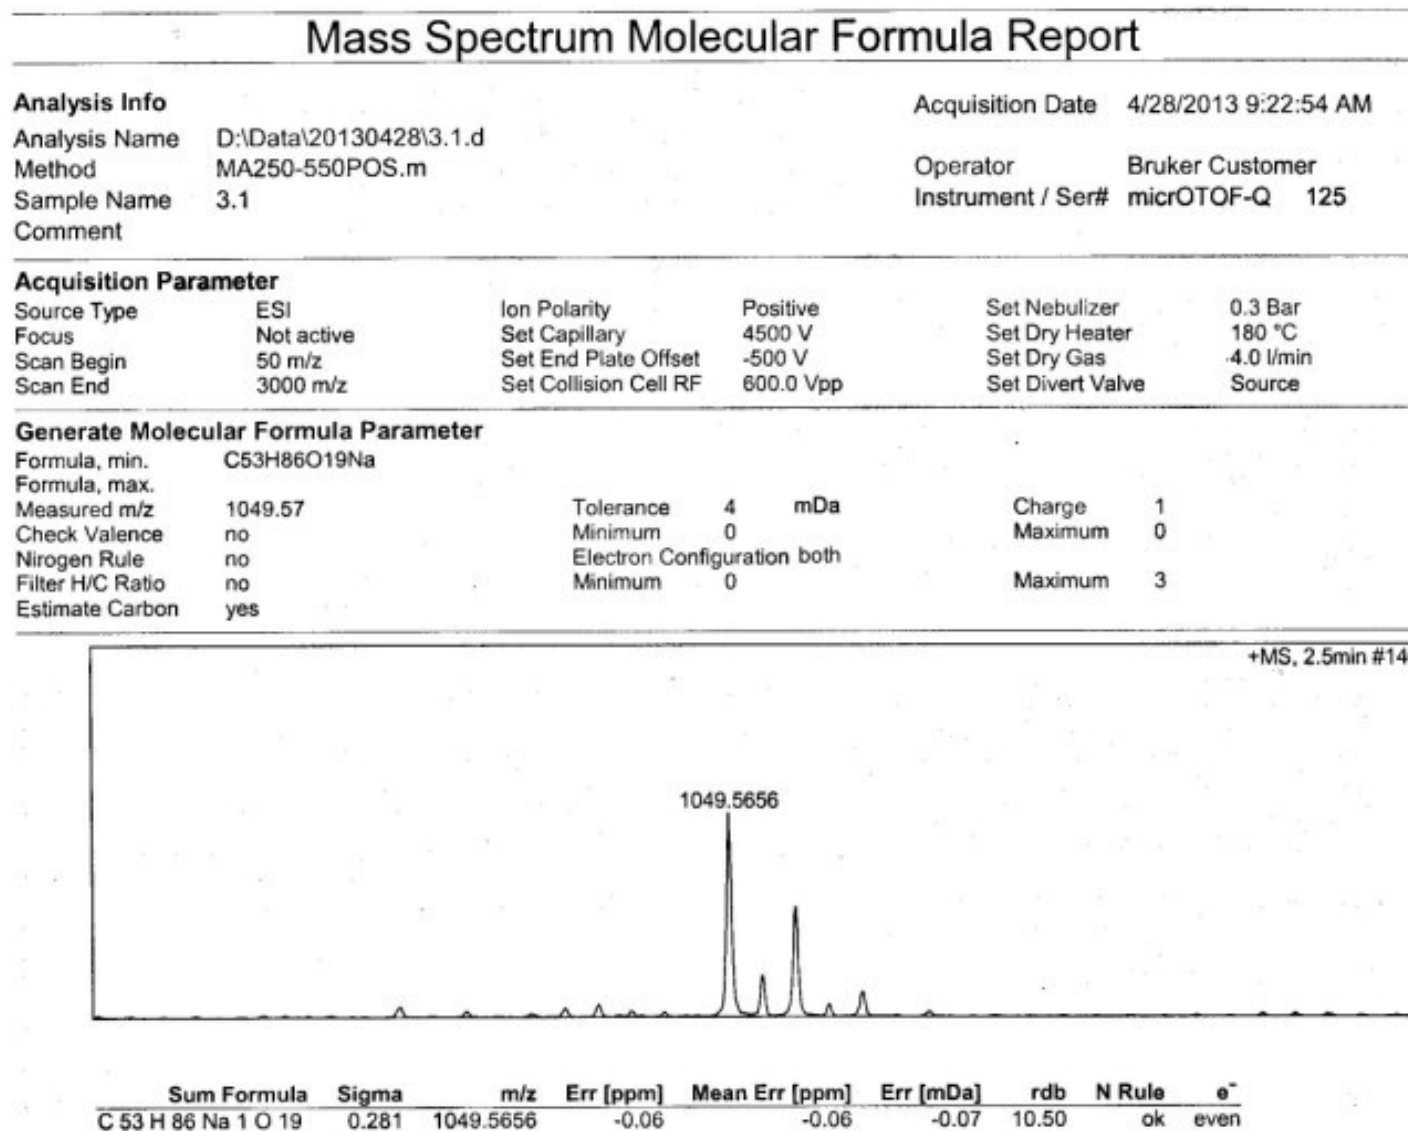

Figure S4. HMBC Spectrum of 3-*O*-(3'-*O*-angeloyl)- $\beta$ -*D*-glucopyranosyl-28-*O*-[ $\alpha$ -*L*-rhamnopyranosyl(1 $\rightarrow$ 2)]- $\beta$ -*D*-glucopyranosyl-3 $\beta$ , 21 $\beta$ , 22 $\alpha$ , 28-tetrahydroxy-olean-12-ene (1) in C<sub>5</sub>D<sub>5</sub>N.

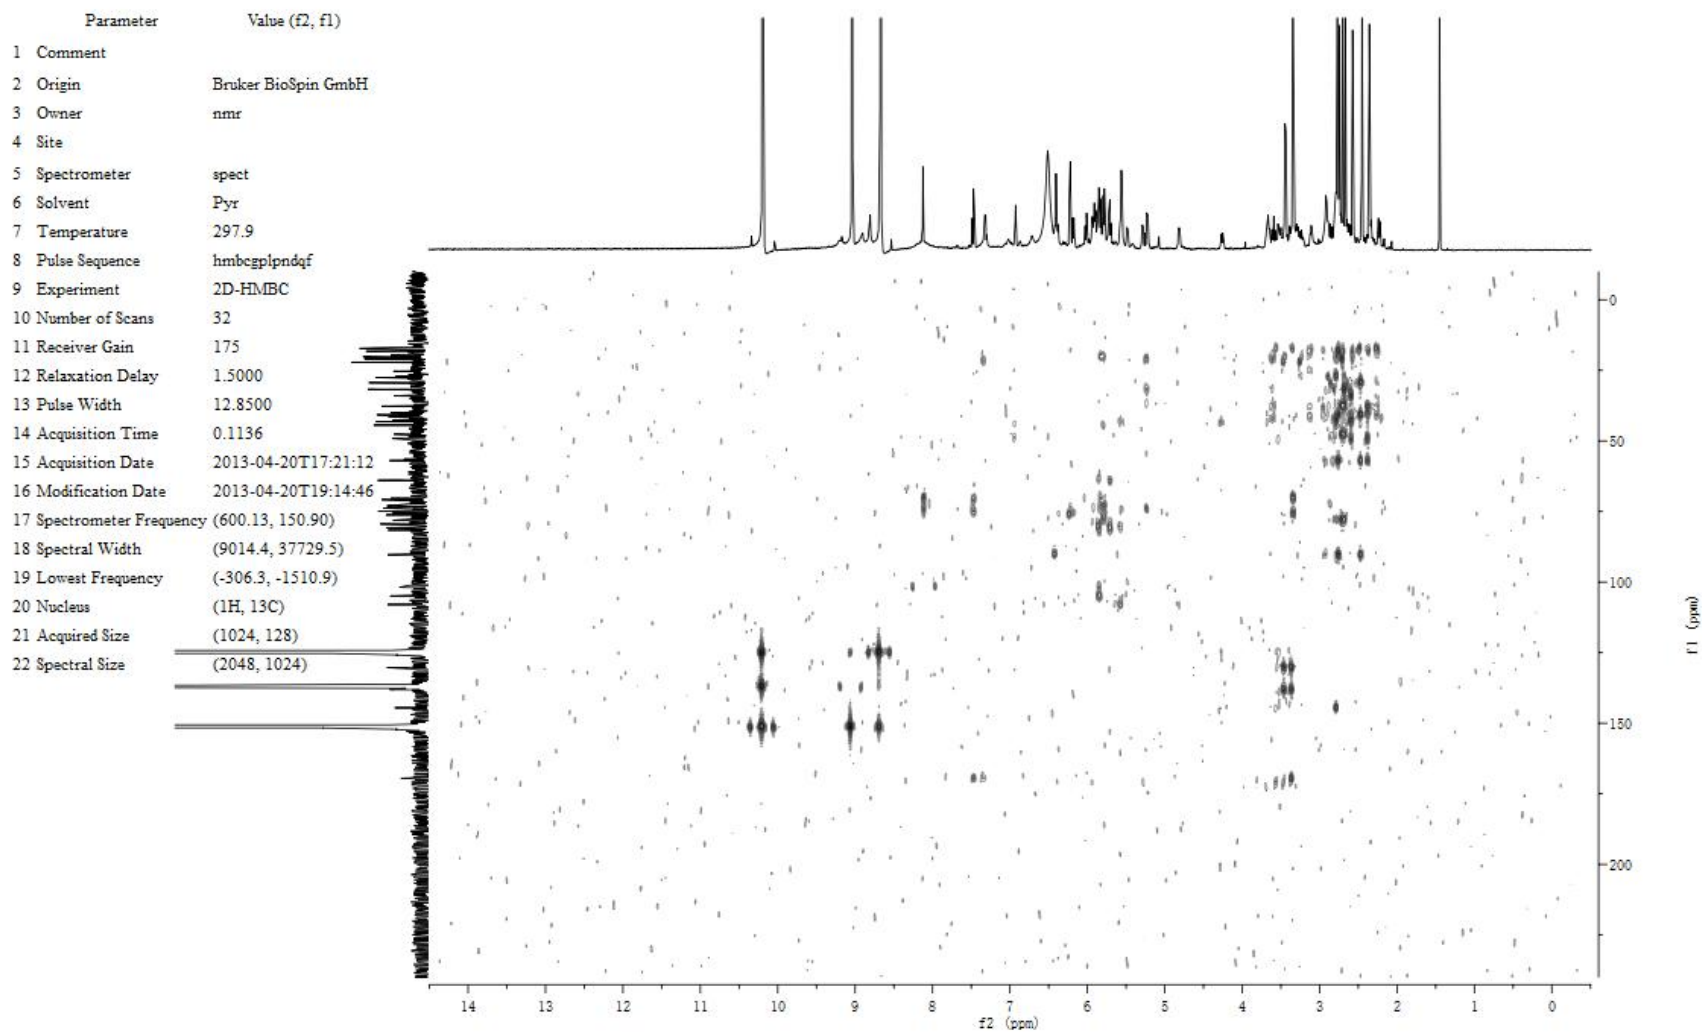



Figure S5. HSQC Spectrum of 3-*O*-(3'-*O*-angeloyl)- $\beta$ -*D*-glucopyranosyl-28-*O*-[ $\alpha$ -*L*-rhamnopyranosyl(1 $\rightarrow$ 2)]- $\beta$ -*D*-glucopyranosyl-3 $\beta$ , 21 $\beta$ , 22 $\alpha$ , 28-tetrahydroxy-olean-12-ene (1) in C<sub>5</sub>D<sub>5</sub>N.

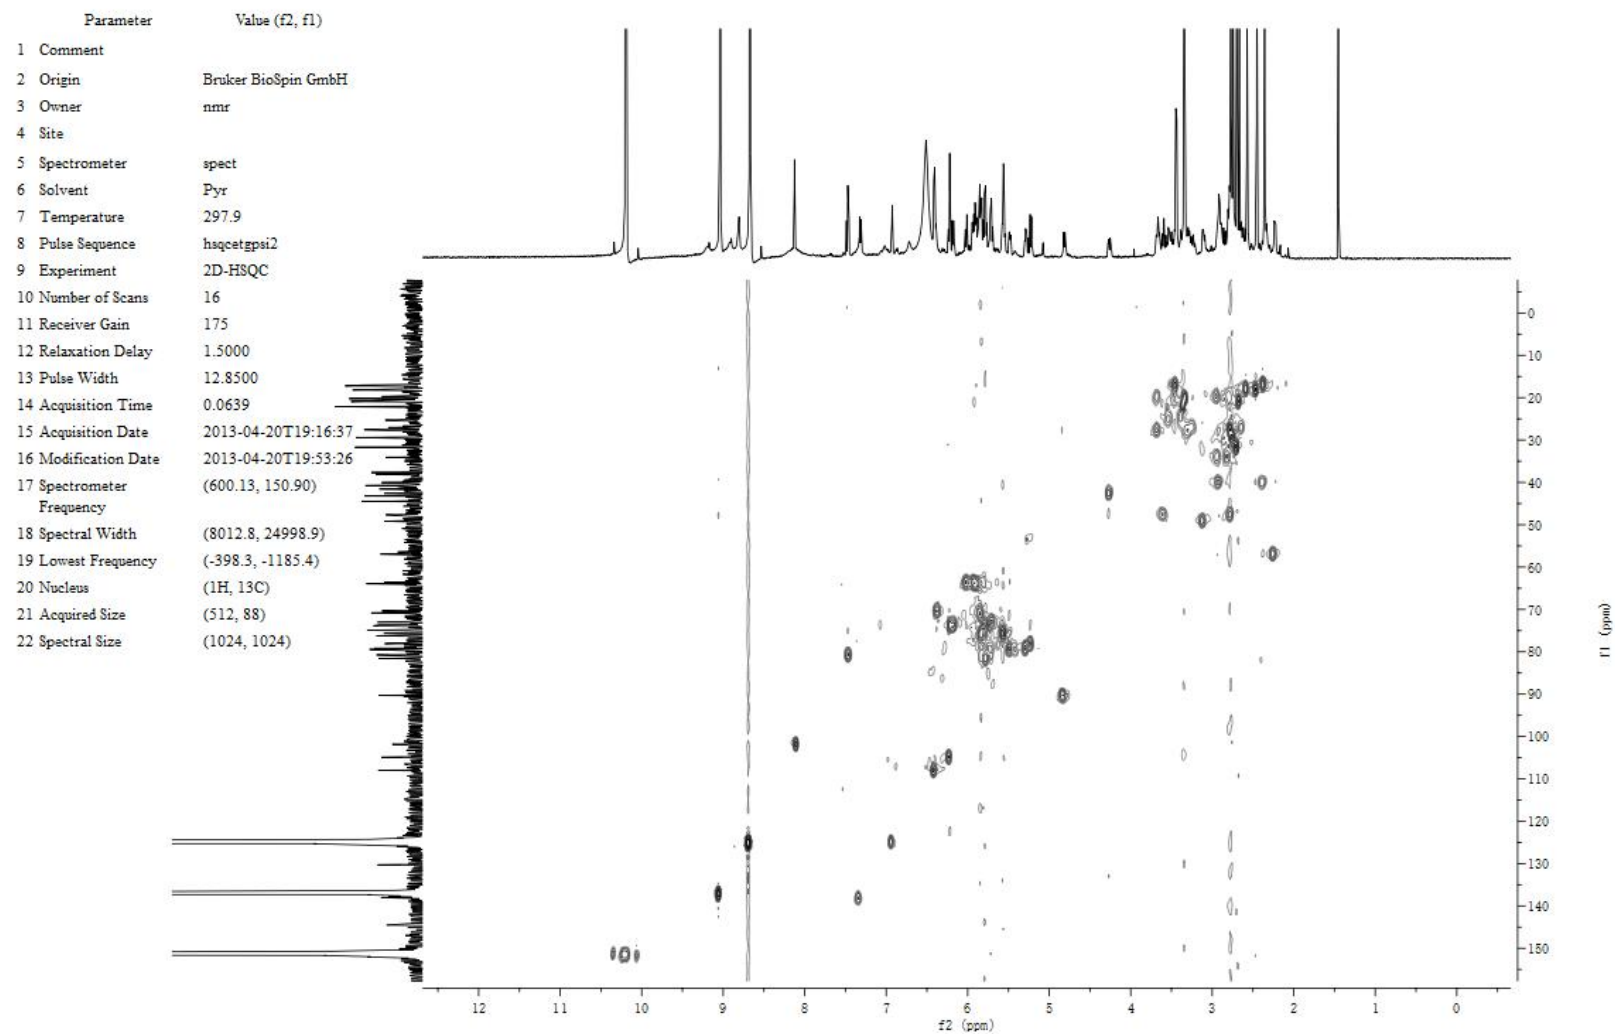

Figure S6. NOESY Spectrum of 3-*O*-(3'-*O*-angeloyl)- $\beta$ -*D*-glucopyranosyl-28-*O*- [ $\alpha$ -*L*-rhamnopyranosyl(1 $\rightarrow$ 2)]- $\beta$ -*D*-glucopyranosyl-3 $\beta$ , 21 $\beta$ , 22 $\alpha$ , 28-tetrahydroxy-olean-12-ene (1) in C<sub>5</sub>D<sub>5</sub>N.

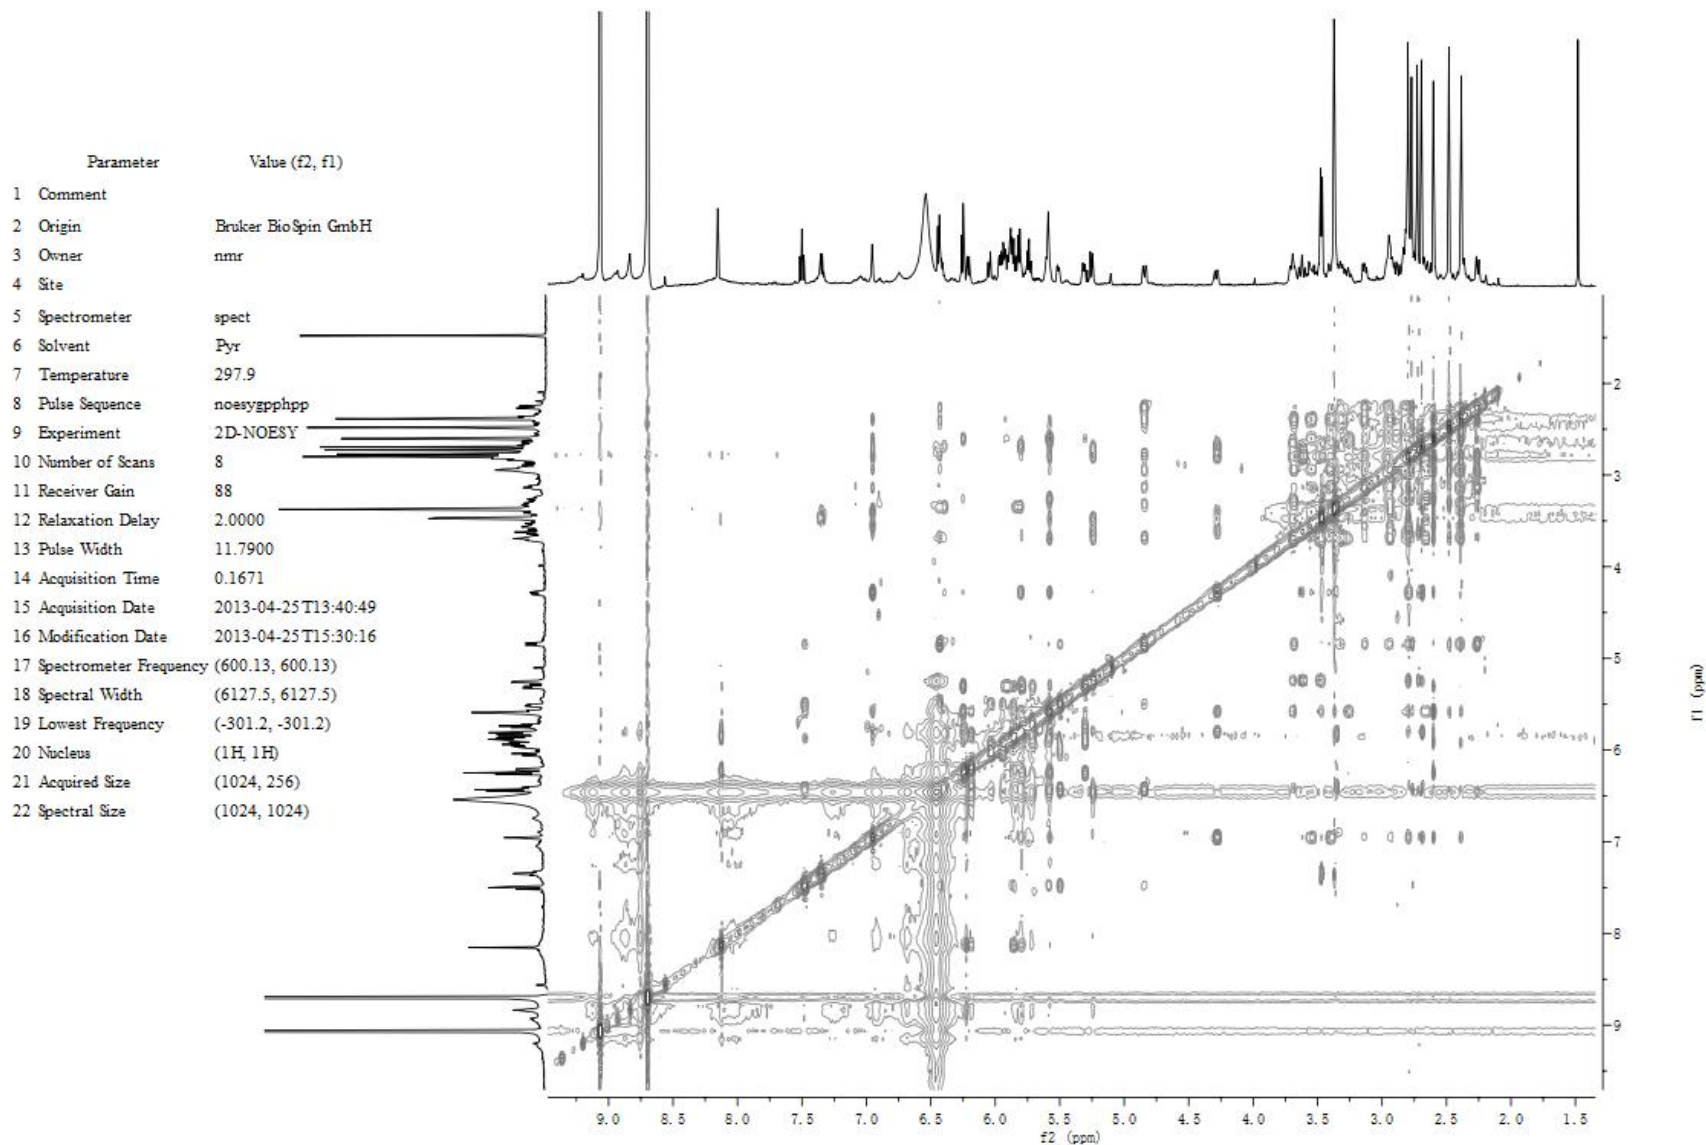

Figure S7. IR Spectrum of 3-O-(3'-O-angeloyl)- $\beta$ -D-glucopyranosyl-28-O- [ $\alpha$ -L-rhamnopyranosyl(1 $\rightarrow$ 2)]- $\beta$ -D-glucopyranosyl-3 $\beta$ , 21 $\beta$ , 22 $\alpha$ , 28-tetrahydro-olean-12-ene (1).

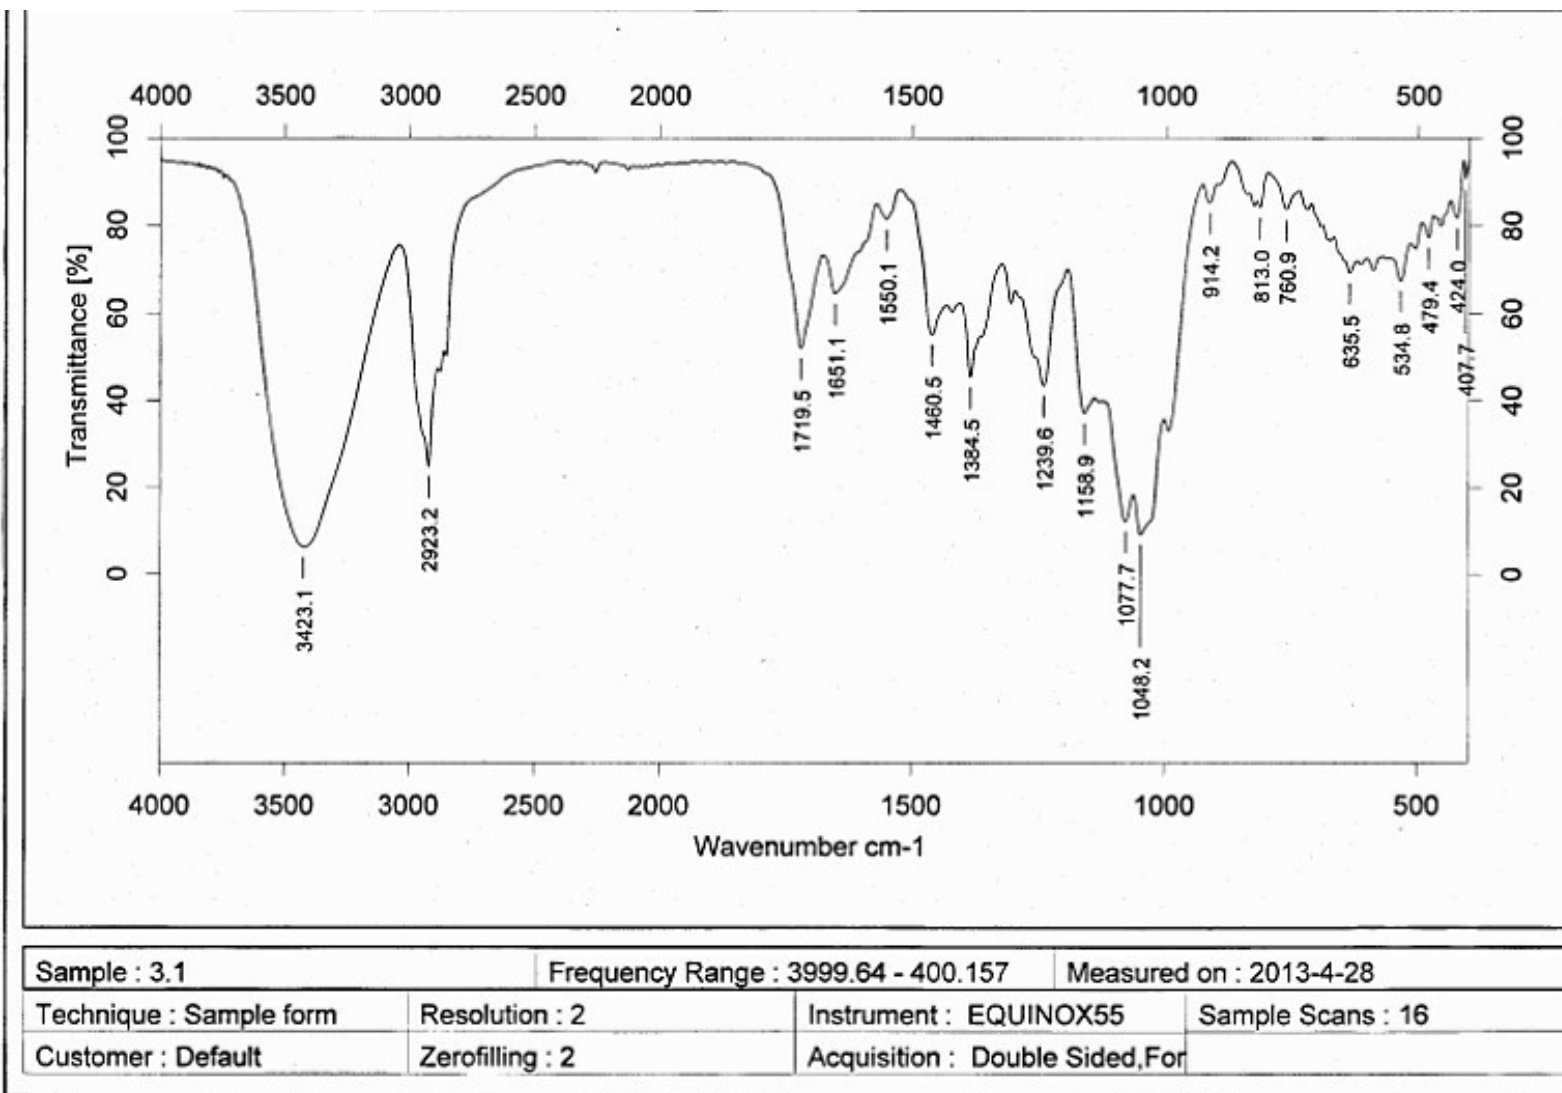

Figure S8. <sup>1</sup>H-NMR Spectrum of 3-*O*-[ $\alpha$ -*L*-arabinofuranosyl(1 $\rightarrow$ 3)]- $\beta$ -*D*-galactopyranosyl(1 $\rightarrow$ 2)- $\beta$ -*D*-6'-*n*-butyl-glucuronic acid-21-*O*-epoxyangeloyl-22-*O*-angeloyl-3 $\beta$ , 16 $\alpha$ , 21 $\beta$ , 22 $\alpha$ , 28-pentahydroxy-olean-12-ene (2) in C<sub>5</sub>D<sub>5</sub>N.

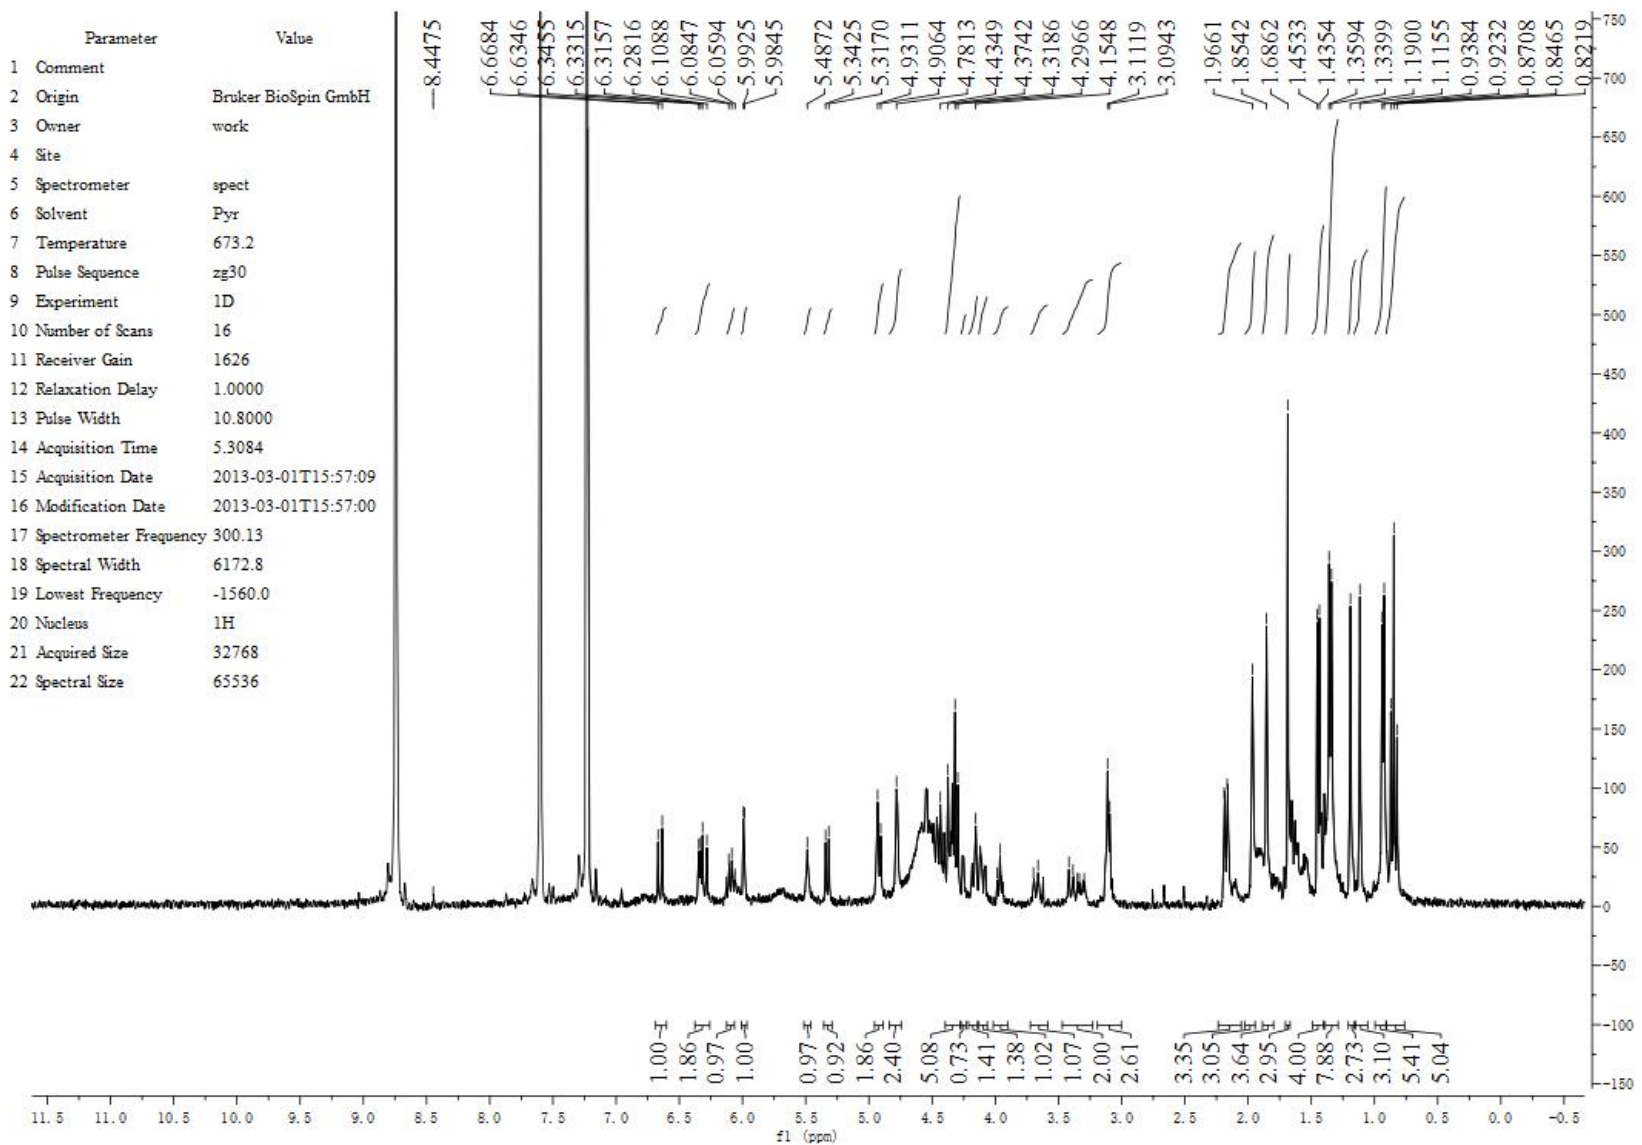

Figure S9.  $^{13}\text{C}$ -NMR Spectrum of 3-*O*-[ $\alpha$ -*L*-arabinofuranosyl(1 $\rightarrow$ 3)]- $\beta$ -*D*-galactopyranosyl(1 $\rightarrow$ 2)- $\beta$ -*D*-6'-*n*-butyl-glucuronic acid-21-*O*-epoxyangeloyl-22-*O*-angeloyl-3 $\beta$ , 16 $\alpha$ , 21 $\beta$ , 22 $\alpha$ , 28-pentahydroxy-olean-12-ene (2) in  $\text{C}_5\text{D}_5\text{N}$ .

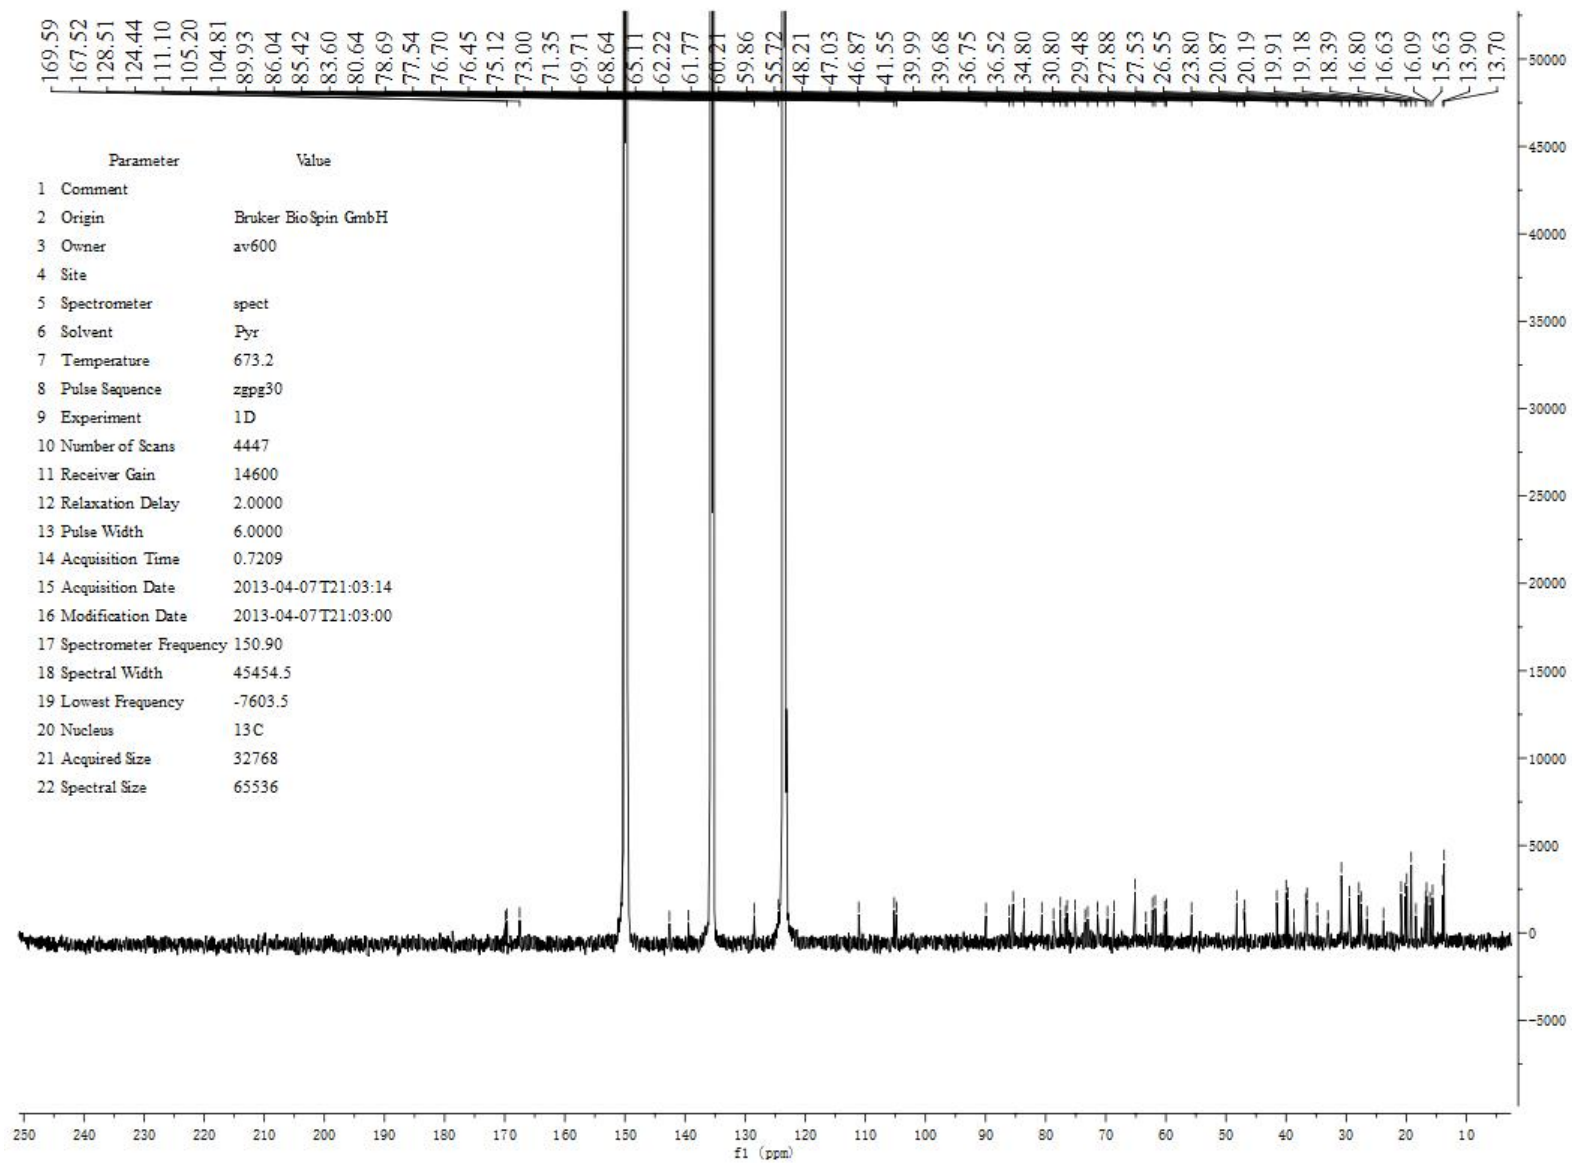

Figure S10. HR-ESI-MS Spectrum of 3-O-[ $\alpha$ -L-arabinofuranosyl(1 $\rightarrow$ 3)]- $\beta$ -D-galactopyranosyl(1 $\rightarrow$ 2)- $\beta$ -D-6'-n-butyl-glucuronic acid-21-O-epoxyangeloyl-22-O-angeloyl-3 $\beta$ , 16 $\alpha$ , 21 $\beta$ , 22 $\alpha$ , 28-pentahydroxy-olean-12-ene (2).

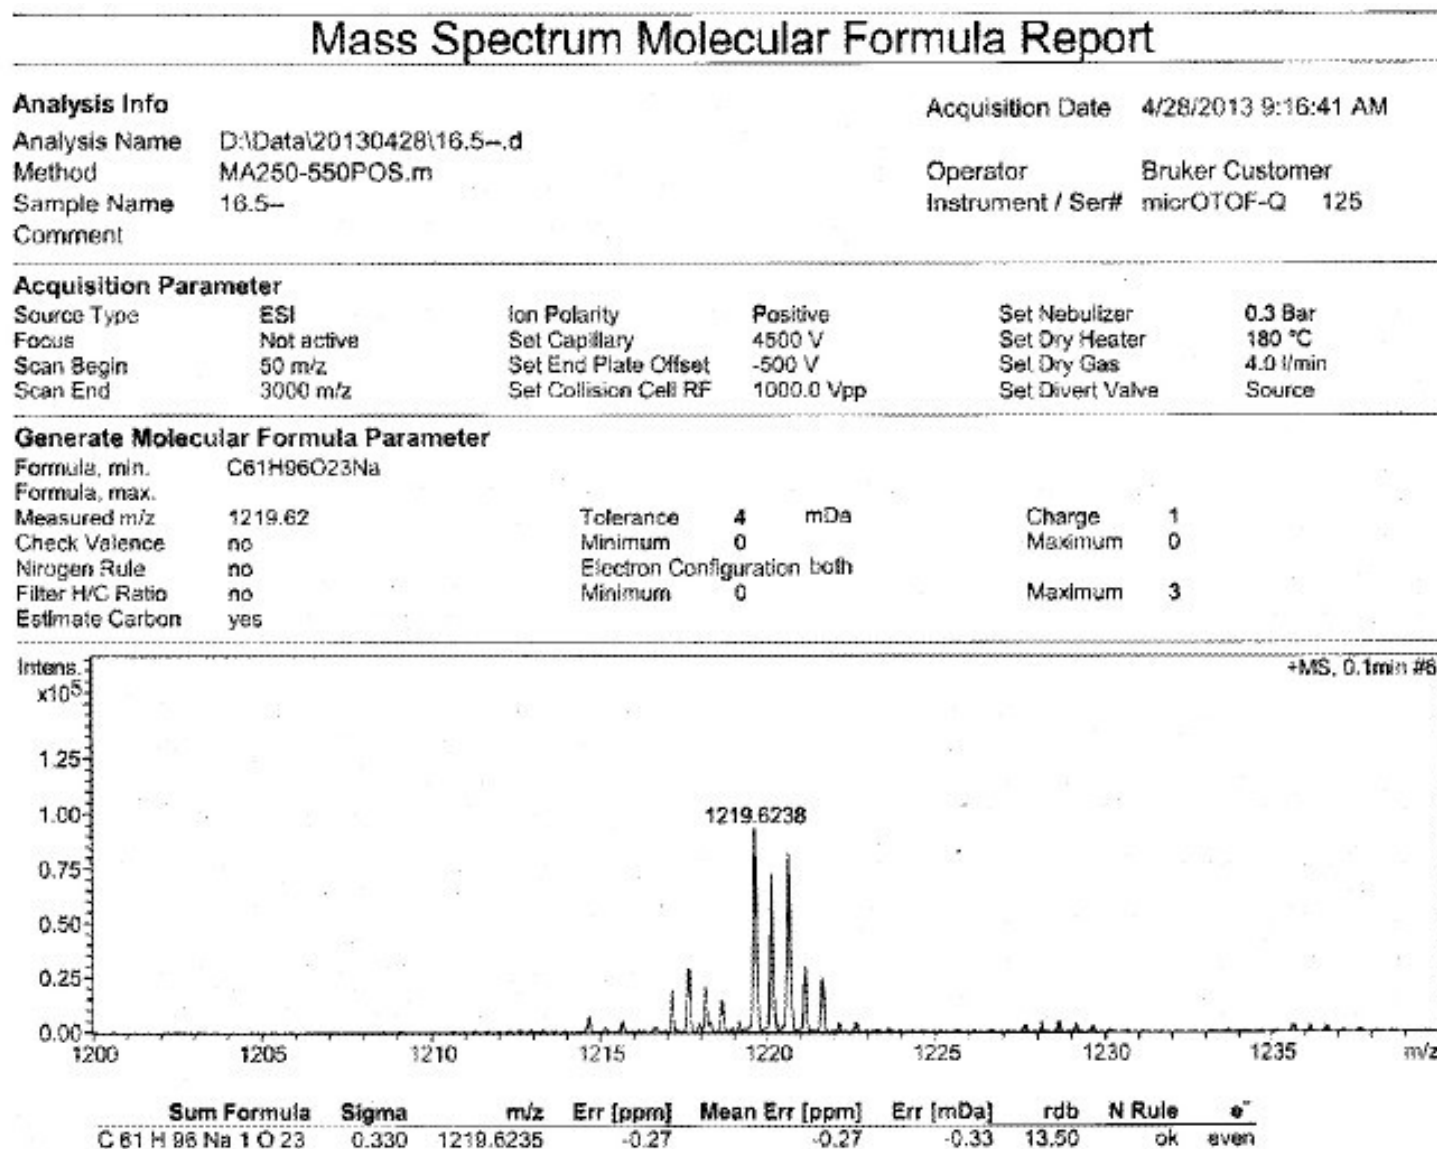



Figure S11. HMBC Spectrum of 3-*O*-[ $\alpha$ -*L*-arabinofuranosyl(1 $\rightarrow$ 3)]- $\beta$ -*D*-galactopyranosyl(1 $\rightarrow$ 2)- $\beta$ -*D*-6'-*n*-butyl-glucuronic acid-21-*O*-epoxyangeloyl-22-*O*-angeloyl-3 $\beta$ , 16 $\alpha$ , 21 $\beta$ , 22 $\alpha$ , 28-pentahydroxy-olean-12-ene (2) in C<sub>5</sub>D<sub>5</sub>N.

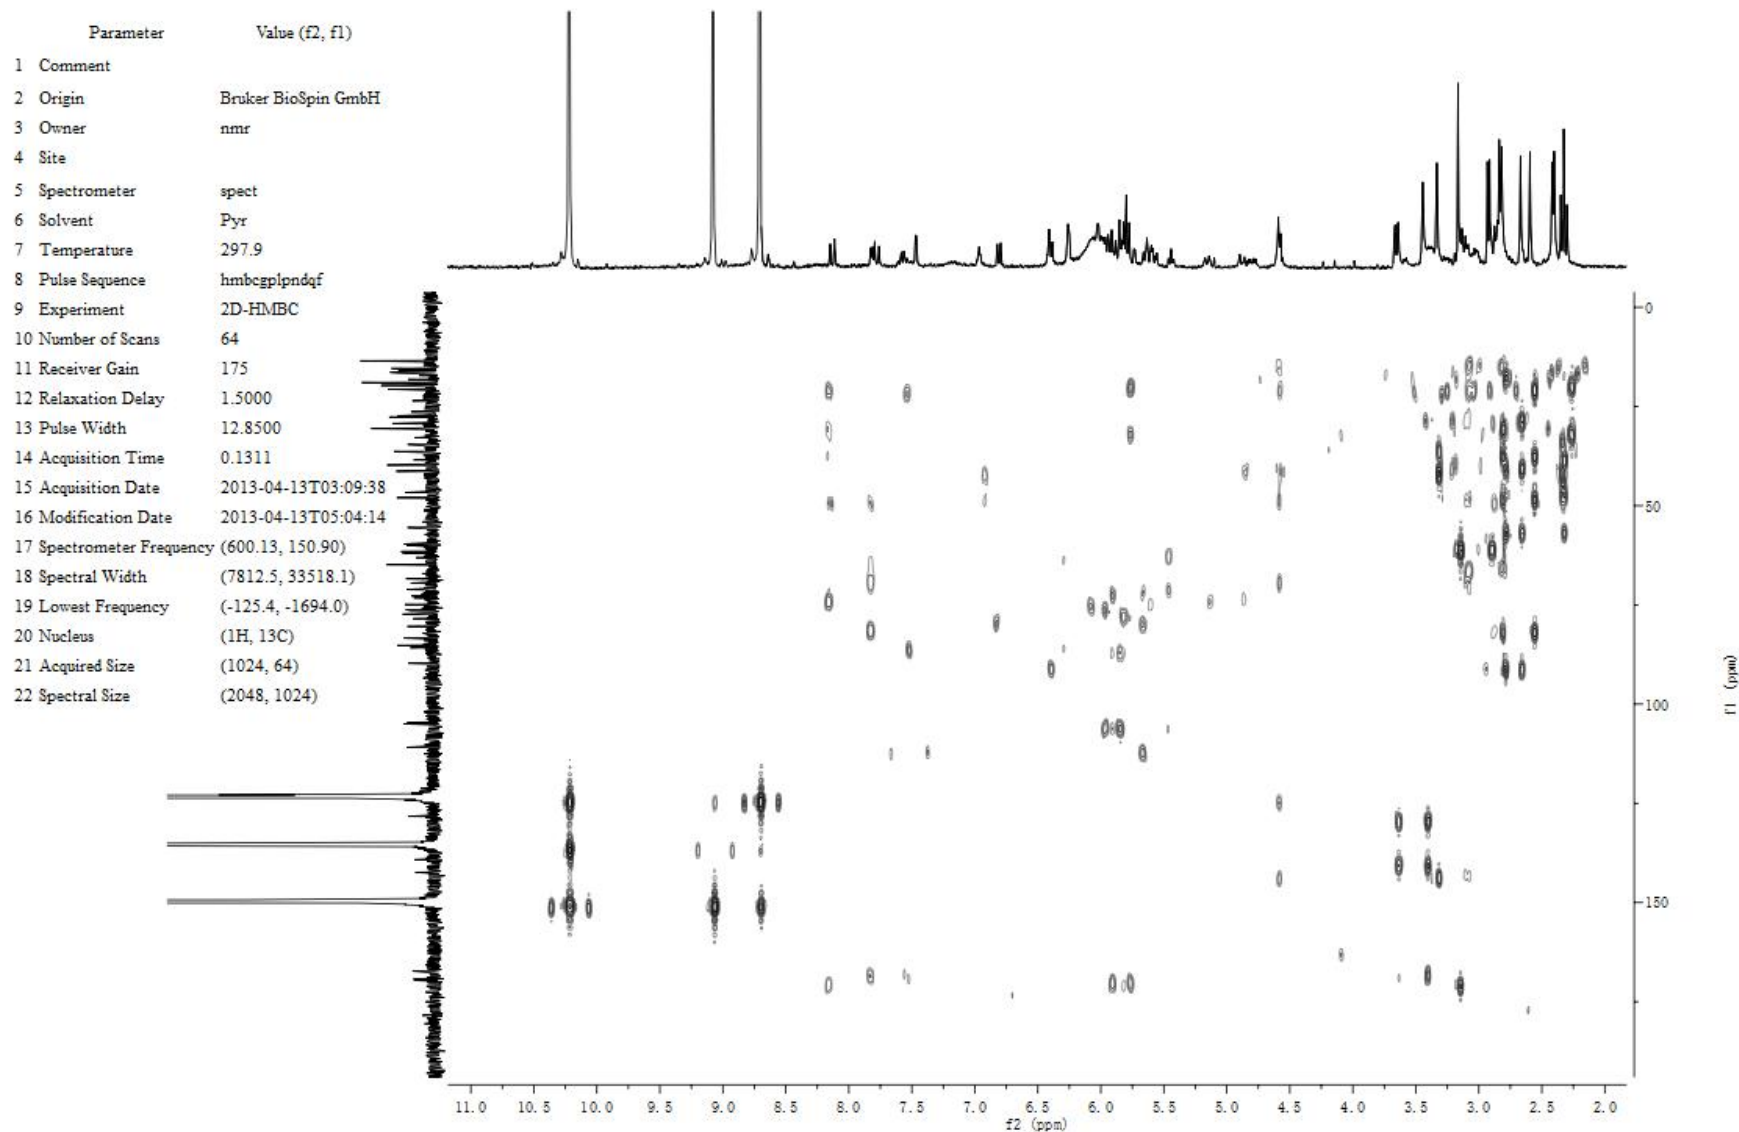

Figure S12. HSQC Spectrum of 3-*O*-[ $\alpha$ -*L*-arabinofuranosyl(1 $\rightarrow$ 3)]- $\beta$ -*D*-galactopyranosyl(1 $\rightarrow$ 2)- $\beta$ -*D*-6'-*n*-butyl-glucuronic acid-21-*O*-epoxyangeloyl-22-*O*-angeloyl-3 $\beta$ , 16 $\alpha$ , 21 $\beta$ , 22 $\alpha$ , 28-pentahydroxy-olean-12-ene (2) in C<sub>5</sub>D<sub>5</sub>N.

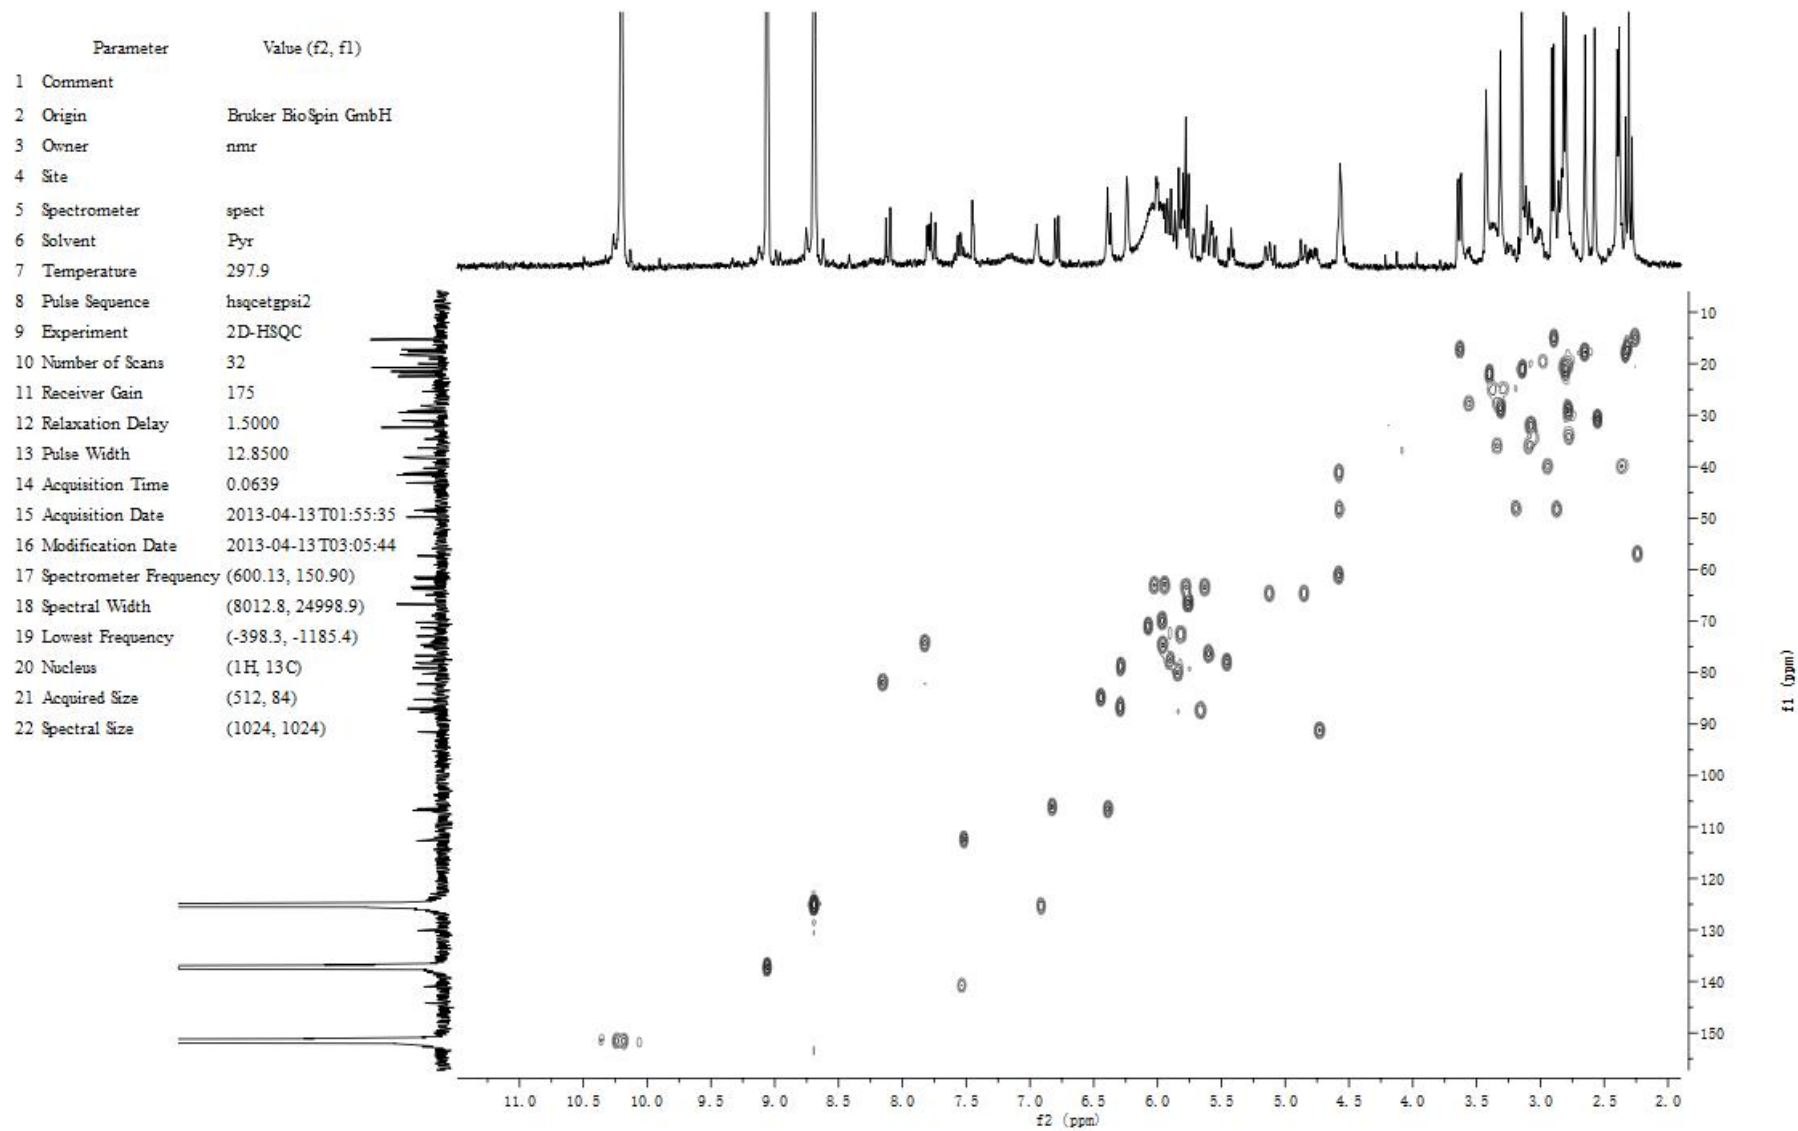



Figure S13. NOESY Spectrum of 3-*O*-[ $\alpha$ -*L*-arabinofuranosyl(1 $\rightarrow$ 3)]- $\beta$ -*D*-galactopyranosyl(1 $\rightarrow$ 2)- $\beta$ -*D*-6'-*n*-butyl-glucuronic acid-21-*O*-epoxyangeloyl-22-*O*-angeloyl-3 $\beta$ , 16 $\alpha$ , 21 $\beta$ , 22 $\alpha$ , 28-pentahydroxy-olean-12-ene (2) in C<sub>5</sub>D<sub>5</sub>N.

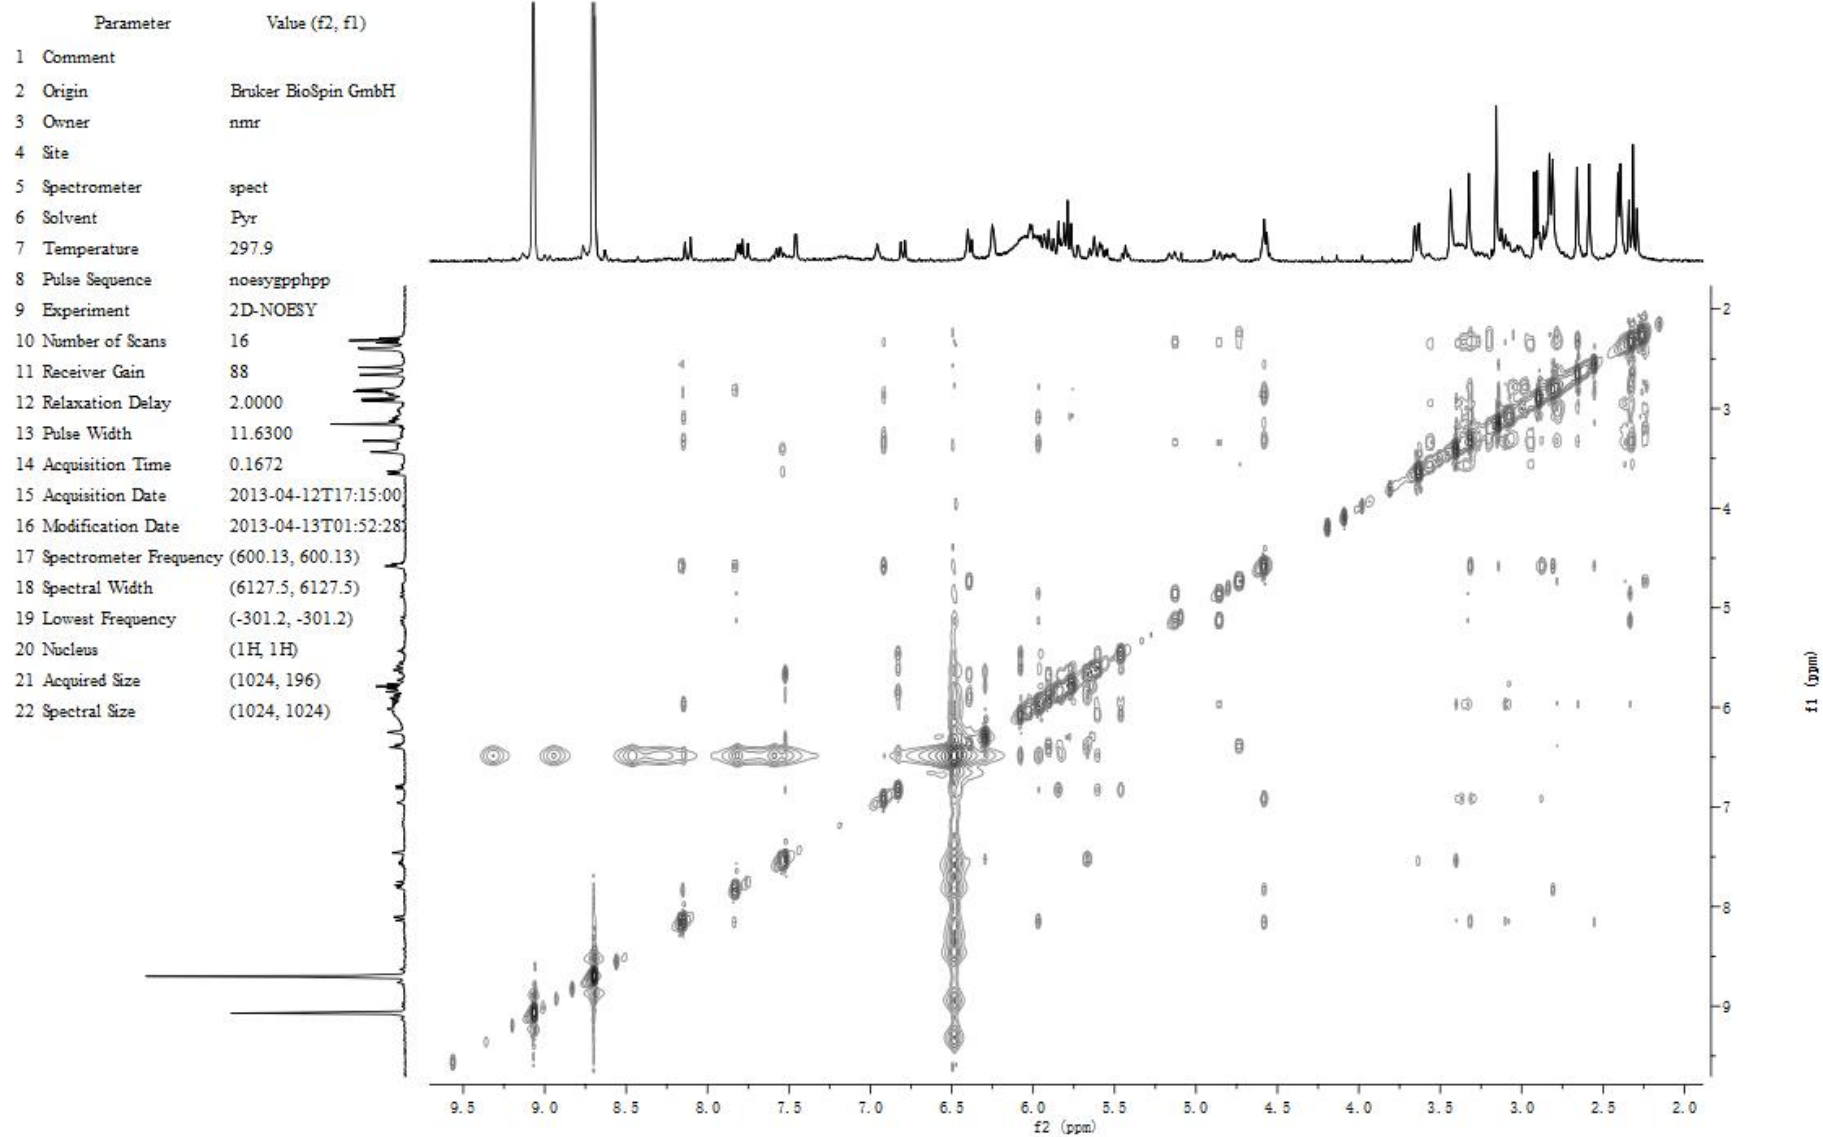

Figure S14. IR Spectrum of 3-O-[ $\alpha$ -L-arabinofuranosyl(1 $\rightarrow$ 3)]- $\beta$ -D-galactopyranosyl(1 $\rightarrow$ 2)- $\beta$ -D-6'-n-butyl-glucuronic acid-21-O-epoxyangeloyl-22-O-angeloyl-3 $\beta$ , 16 $\alpha$ , 21 $\beta$ , 22 $\alpha$ , 28-pentahydroxy-olean-12-ene (2).

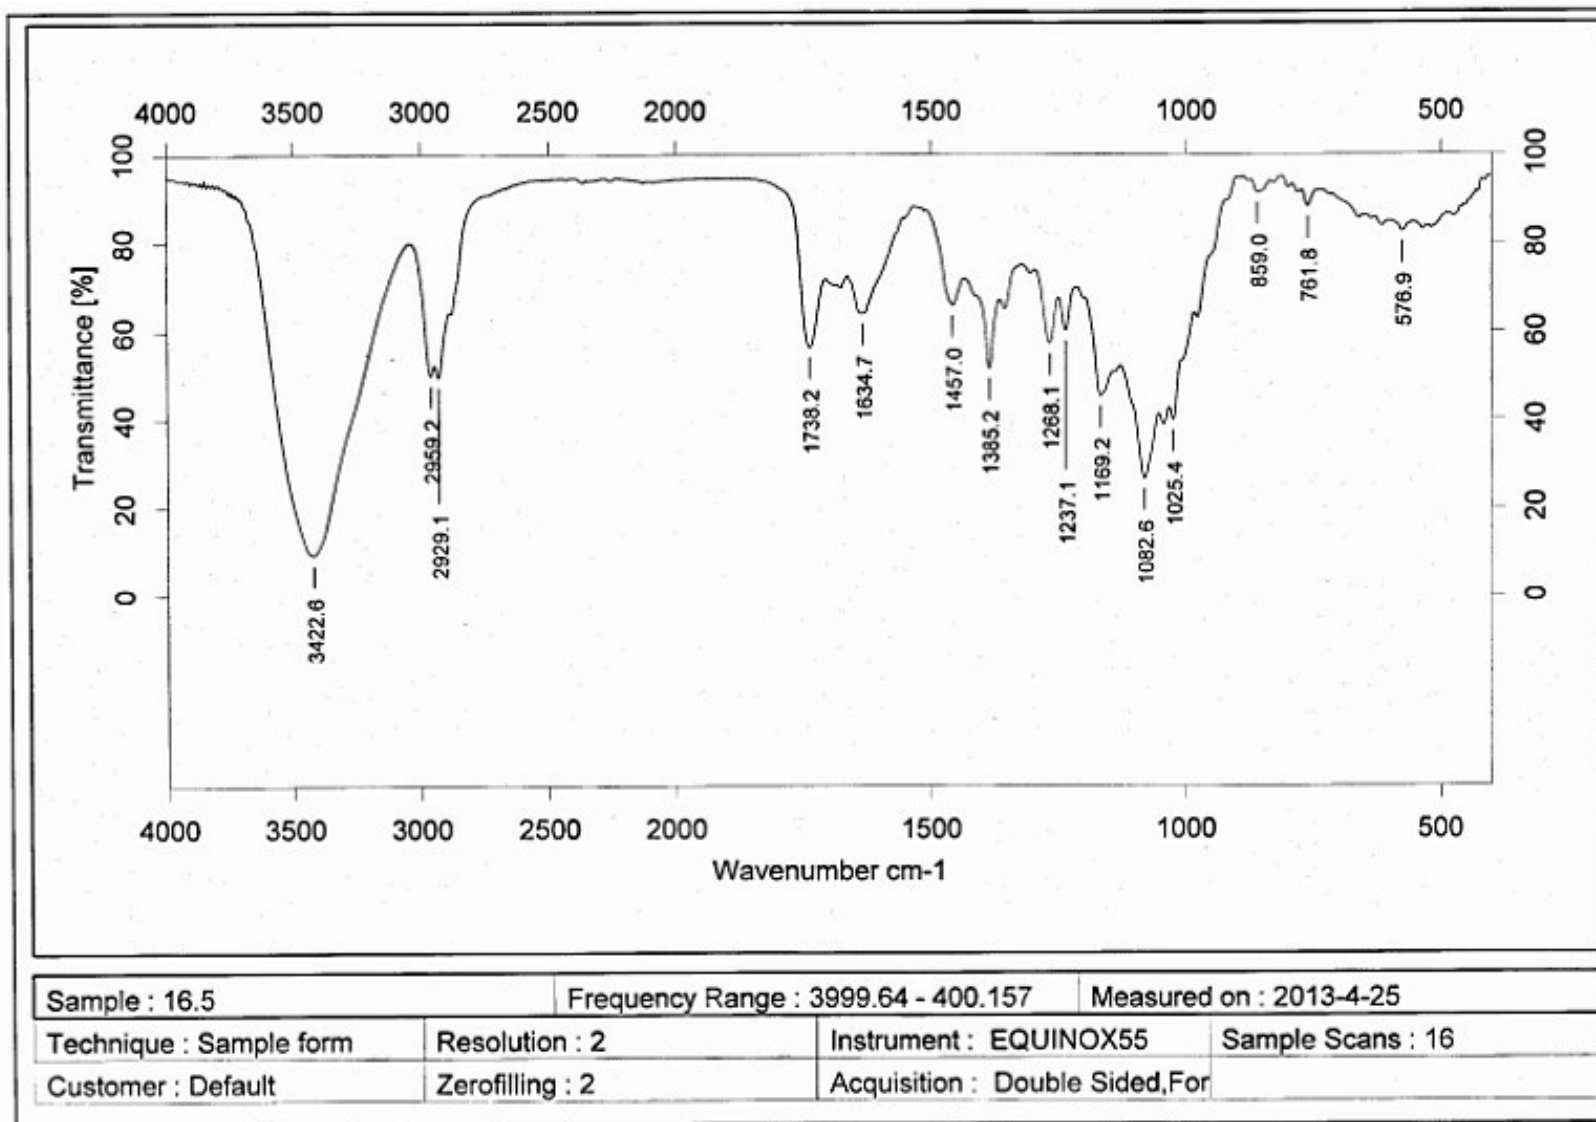

Figure S15. <sup>1</sup>H-NMR Spectrum of 6'-methylster-O-Xanifolia-Y5 (3) in C<sub>6</sub>D<sub>5</sub>N.

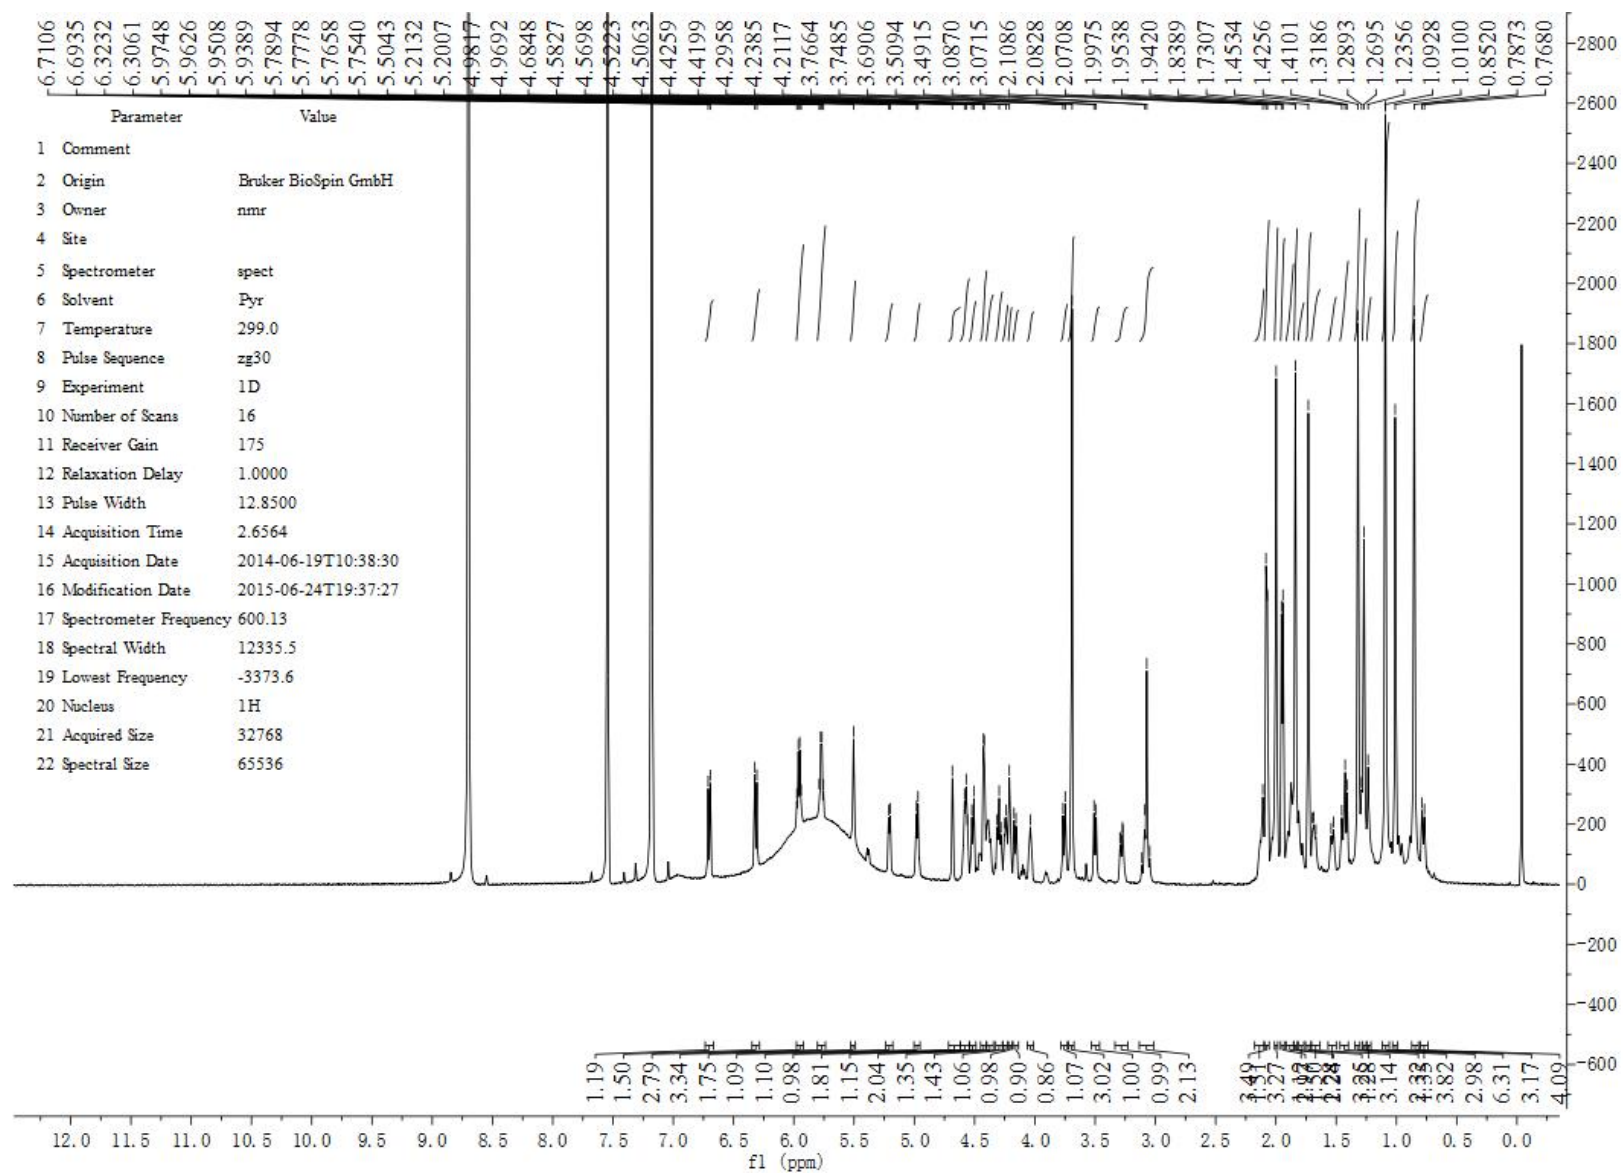

Figure S16.  $^{13}\text{C}$ -NMR Spectrum of 6'-methylster-O-Xanifolia-Y5 (3) in  $\text{C}_5\text{D}_5\text{N}$ .

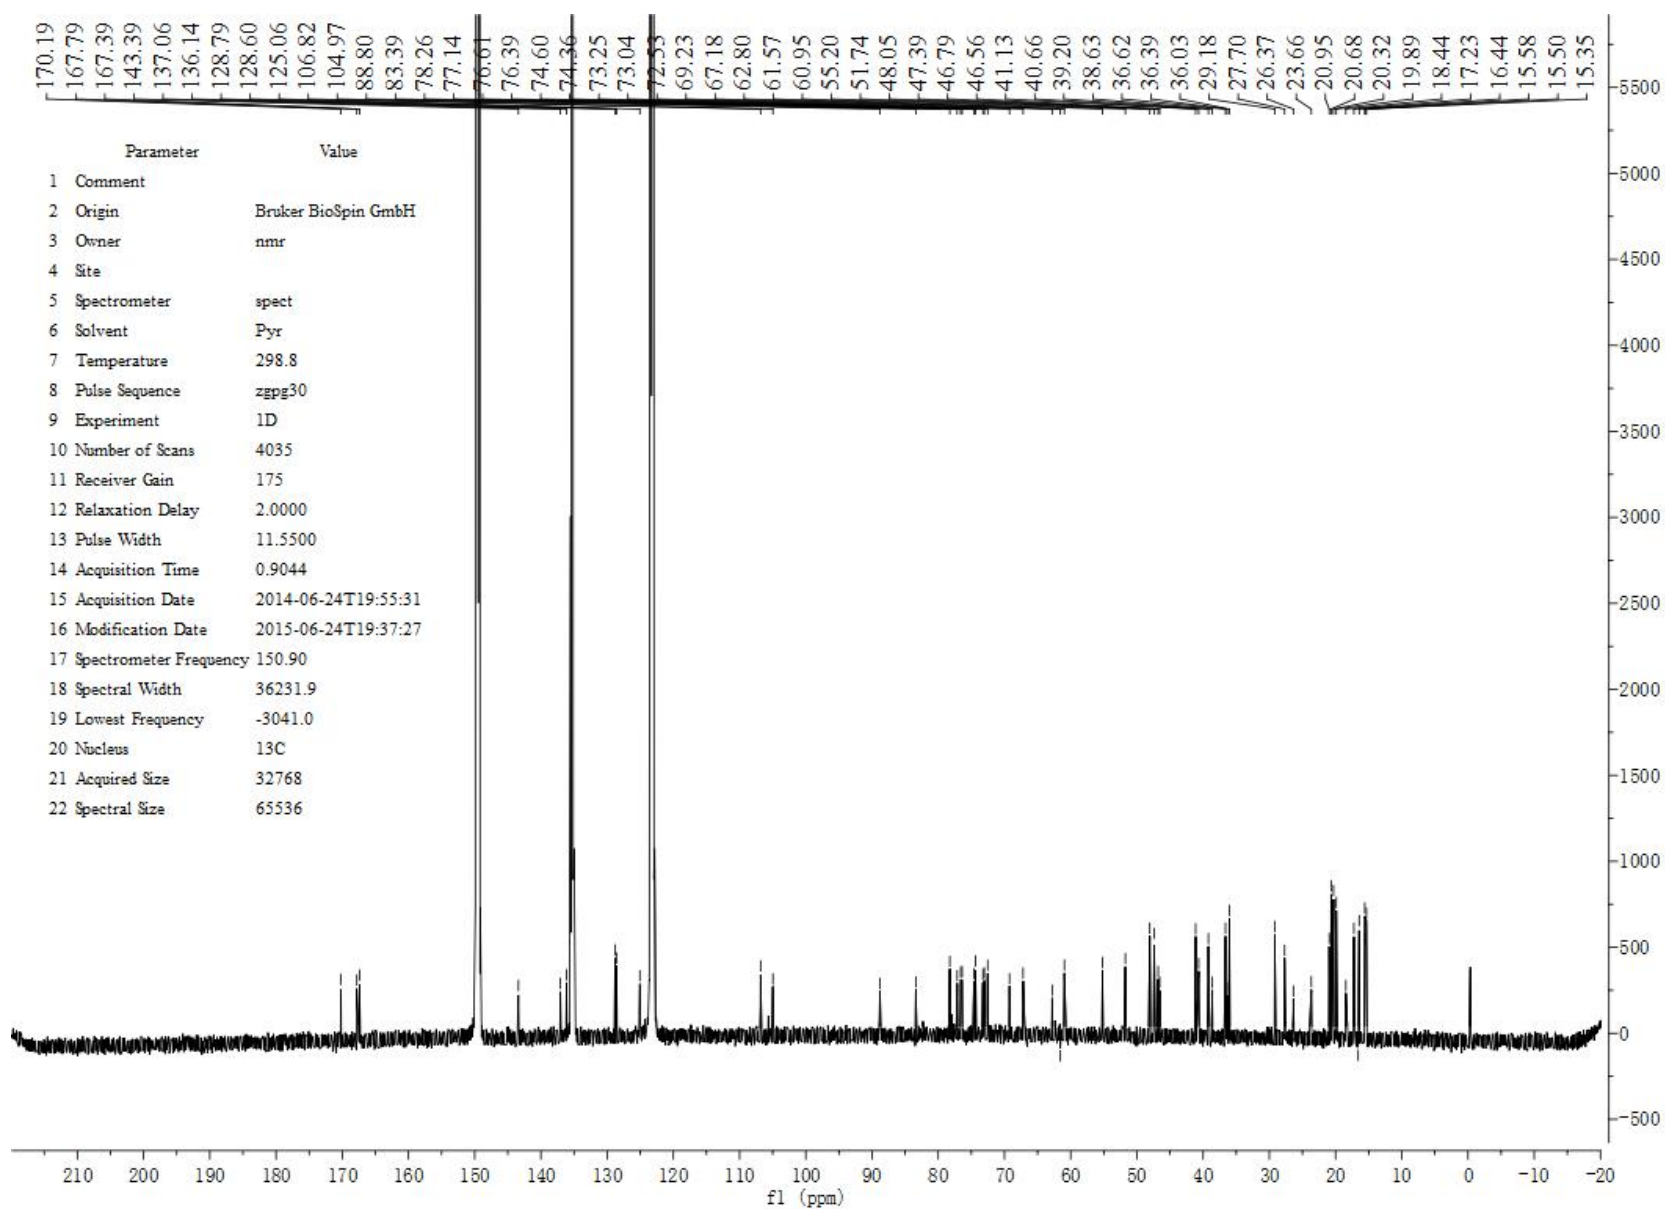

Figure S17. HR-ESI-MS Spectrum of 6'-methylester-O-Xanifolia-Y5 (3).

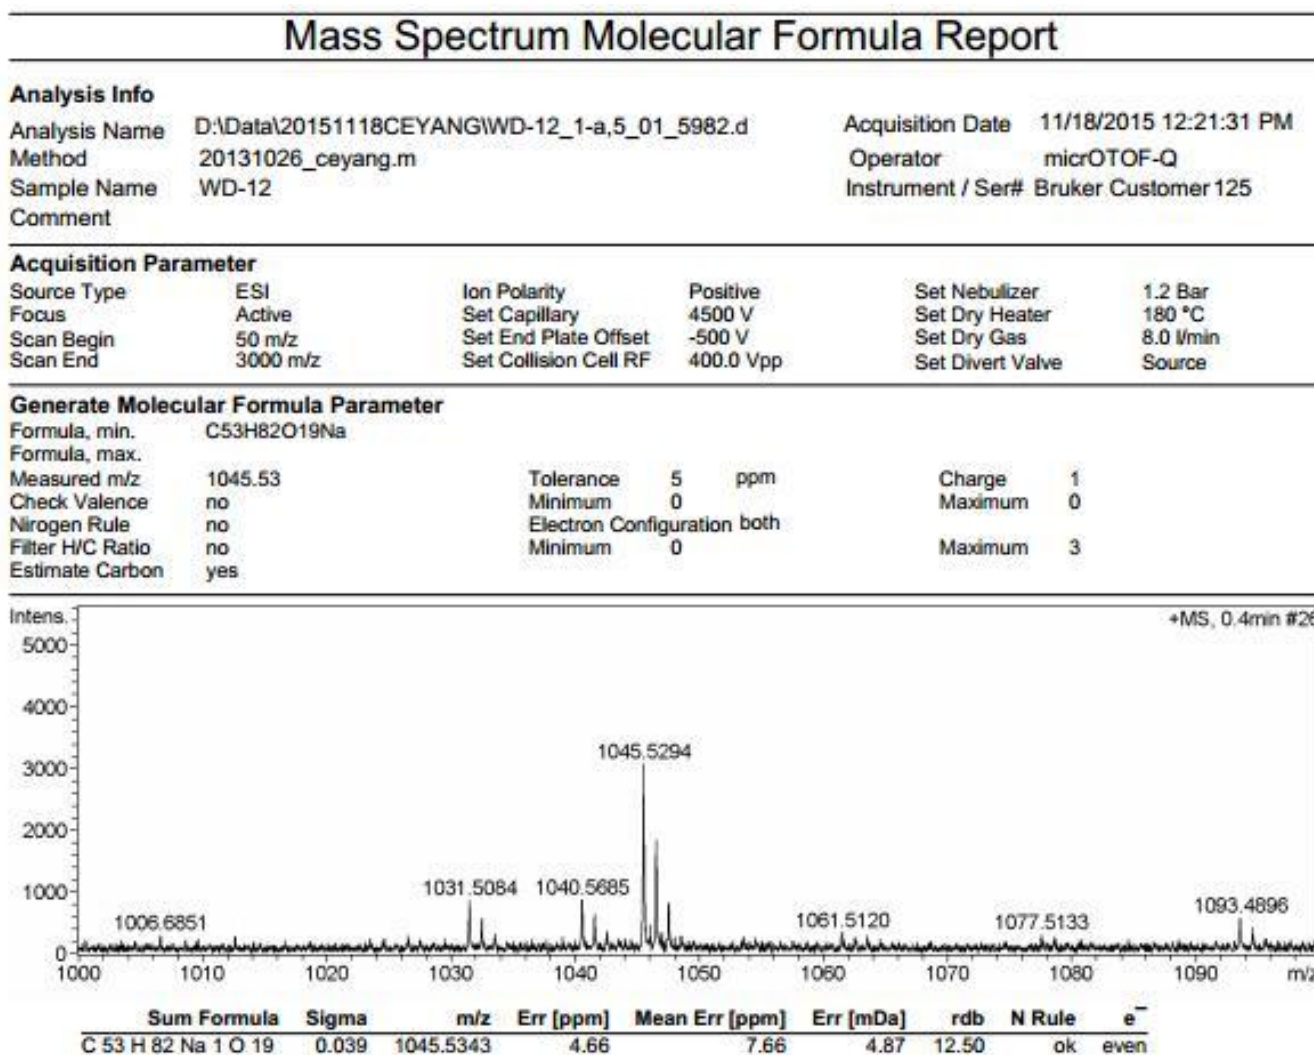



Figure S18. HMBC Spectrum of 6'-methylester-O-Xanifolia-Y5 (3) in C<sub>5</sub>D<sub>5</sub>N.

| Parameter                 | Value (f2, f1)      |
|---------------------------|---------------------|
| 1 Comment                 |                     |
| 2 Origin                  | Bruker BioSpin GmbH |
| 3 Owner                   | av600               |
| 4 Site                    |                     |
| 5 Spectrometer            | spect               |
| 6 Solvent                 | Pyr                 |
| 7 Temperature             | 292.2               |
| 8 Pulse Sequence          | hmbcgpndqf          |
| 9 Experiment              | 2D-HMBC             |
| 10 Number of Scans        | 180                 |
| 11 Receiver Gain          | 29100               |
| 12 Relaxation Delay       | 1.5000              |
| 13 Pulse Width            | 11.1000             |
| 14 Acquisition Time       | 0.0713              |
| 15 Acquisition Date       | 2013-03-30T11:15:47 |
| 16 Modification Date      | 2015-06-24T19:41:02 |
| 17 Spectrometer Frequency | (600.13, 150.90)    |
| 18 Spectral Width         | (7183.9, 30183.6)   |
| 19 Lowest Frequency       | (-582.7, -4.3)      |
| 20 Nucleus                | (1H, 13C)           |
| 21 Acquired Size          | (512, 256)          |
| 22 Spectral Size          | (512, 512)          |

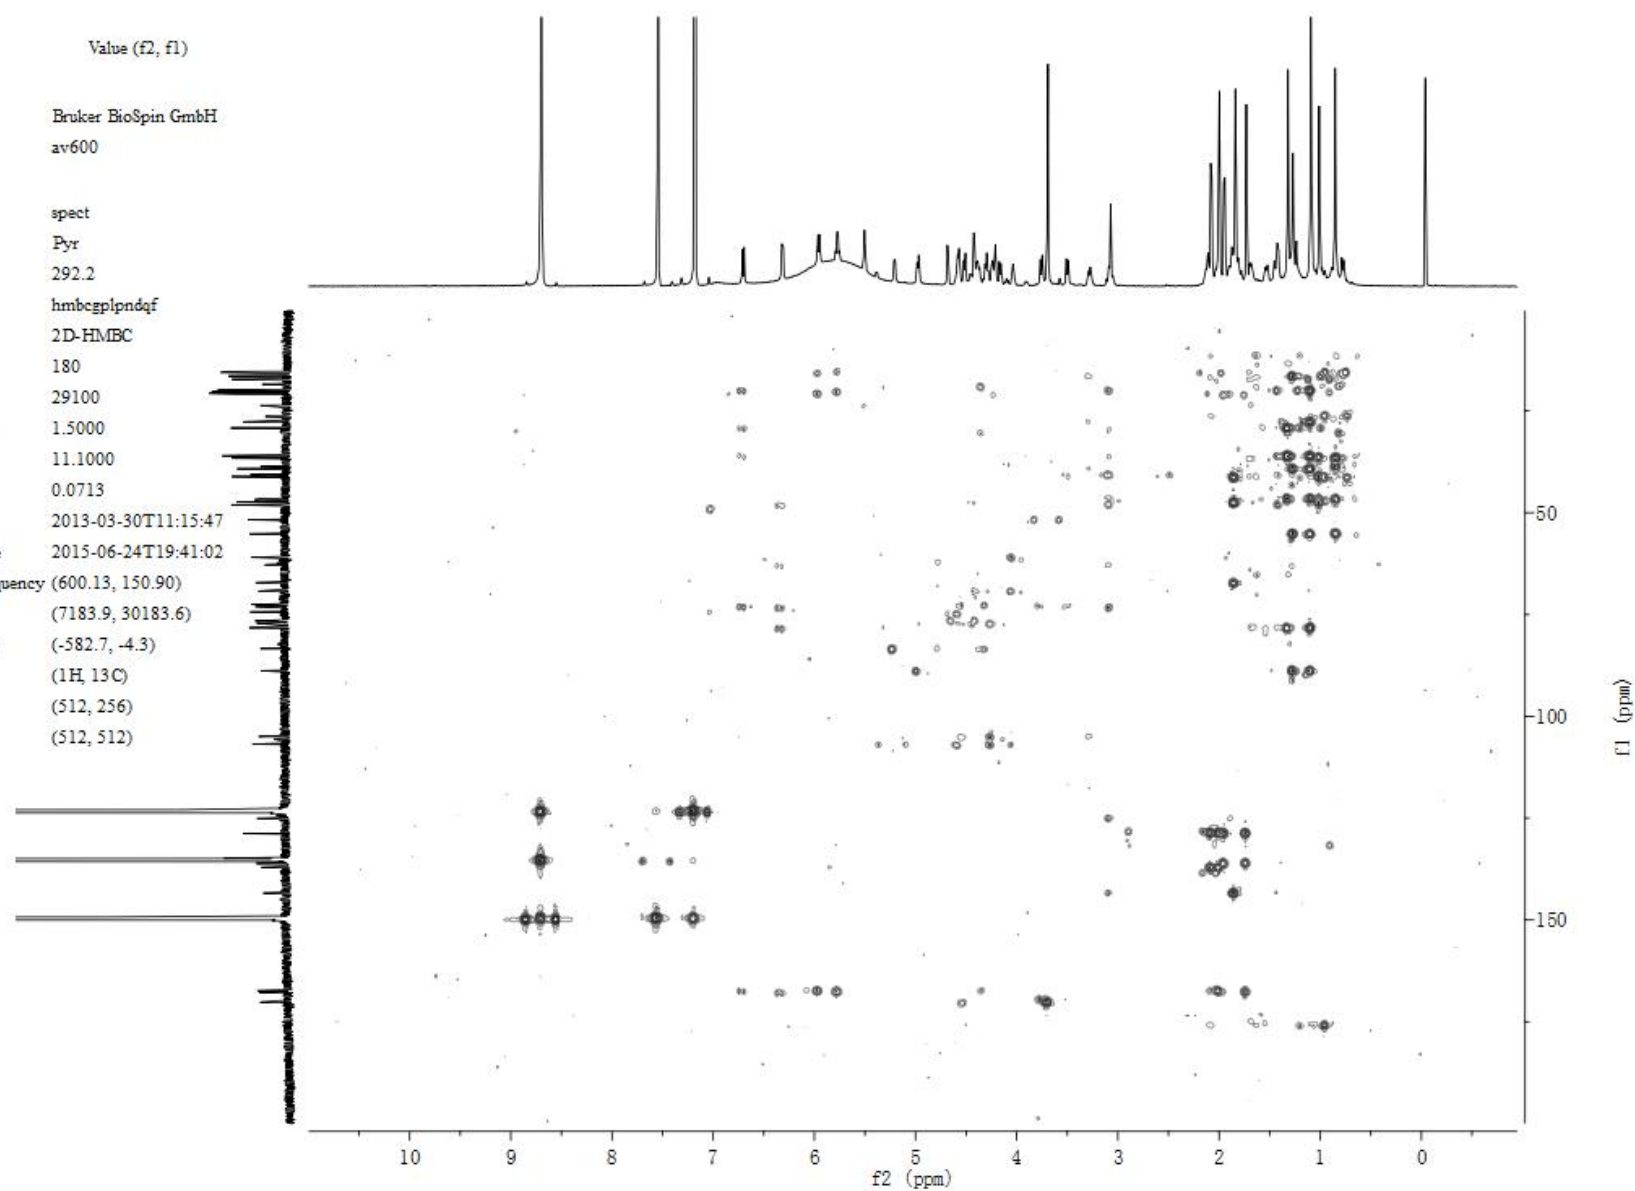

Figure S19. HSQC Spectrum of 6'-methylene-O-Xanifolia-Y5 (3) in C<sub>5</sub>D<sub>5</sub>N.

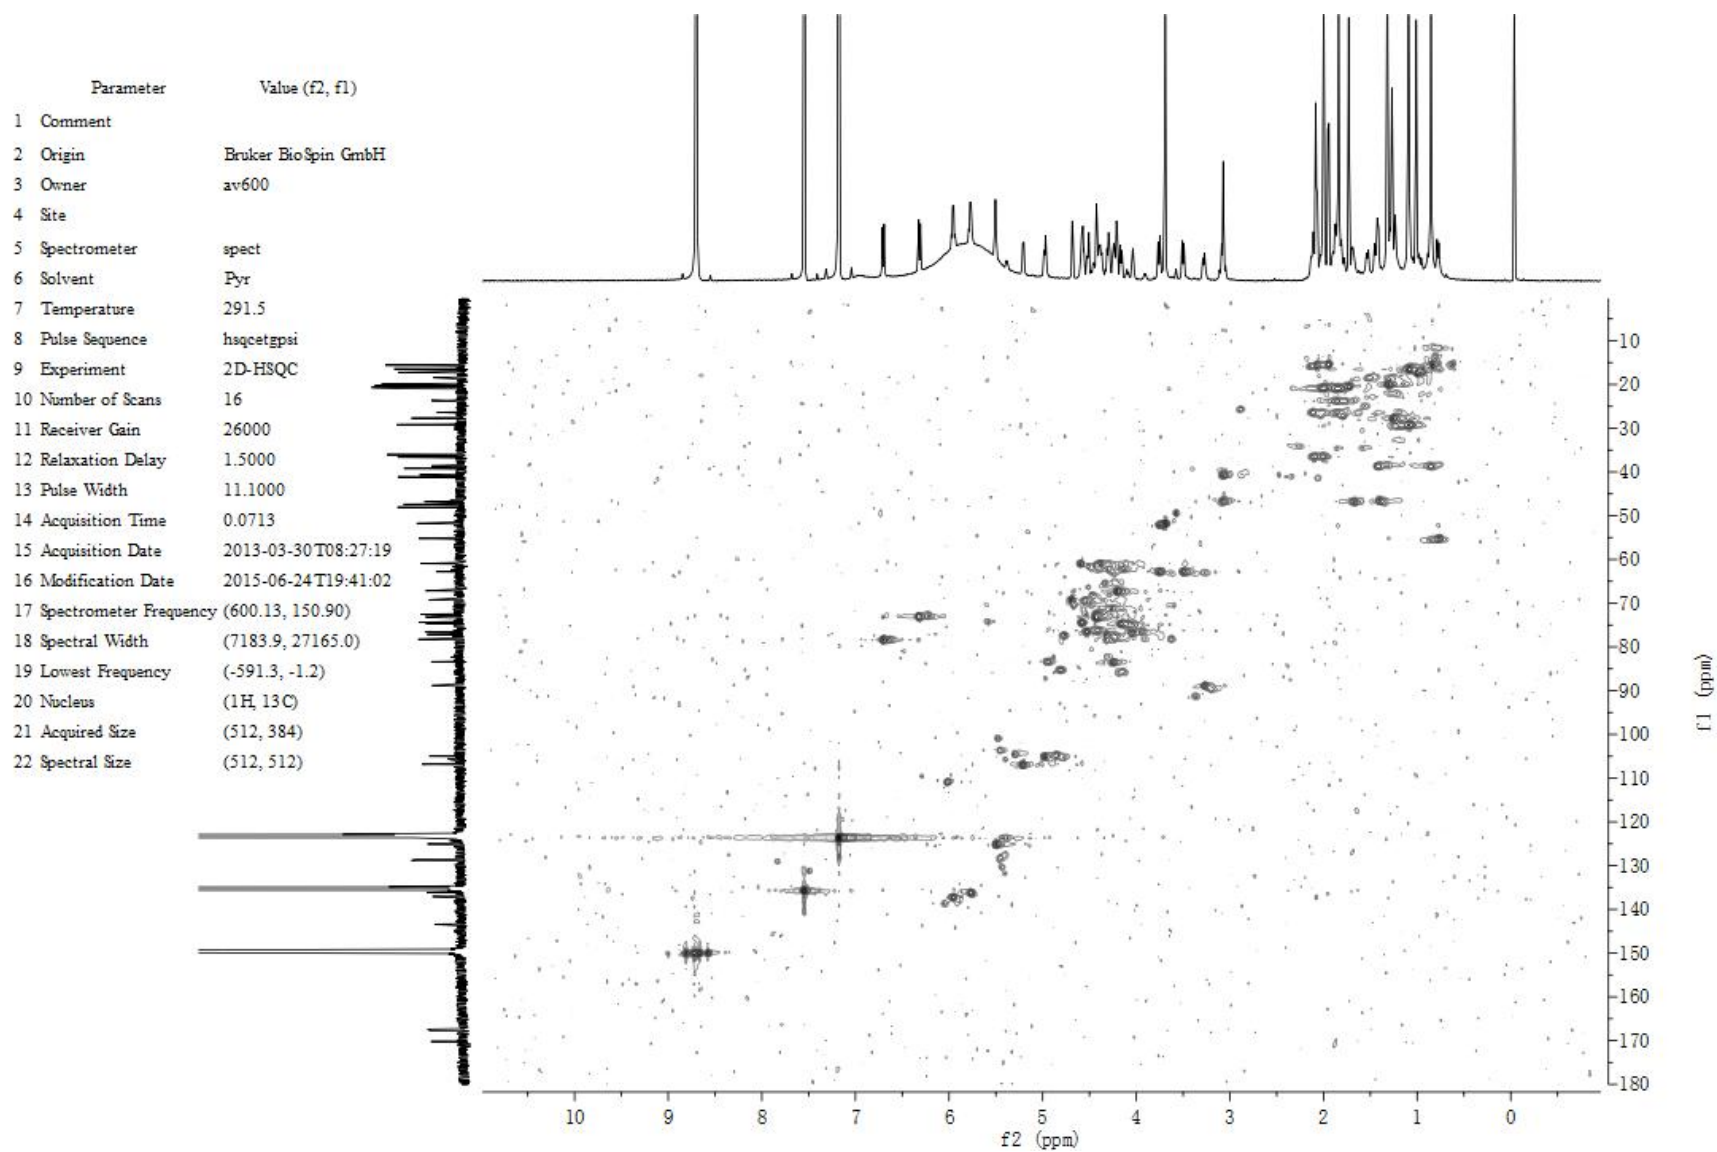

Figure S20. IR Spectrum of 6'-methylester-O-Xanifolia-Y5 (3).

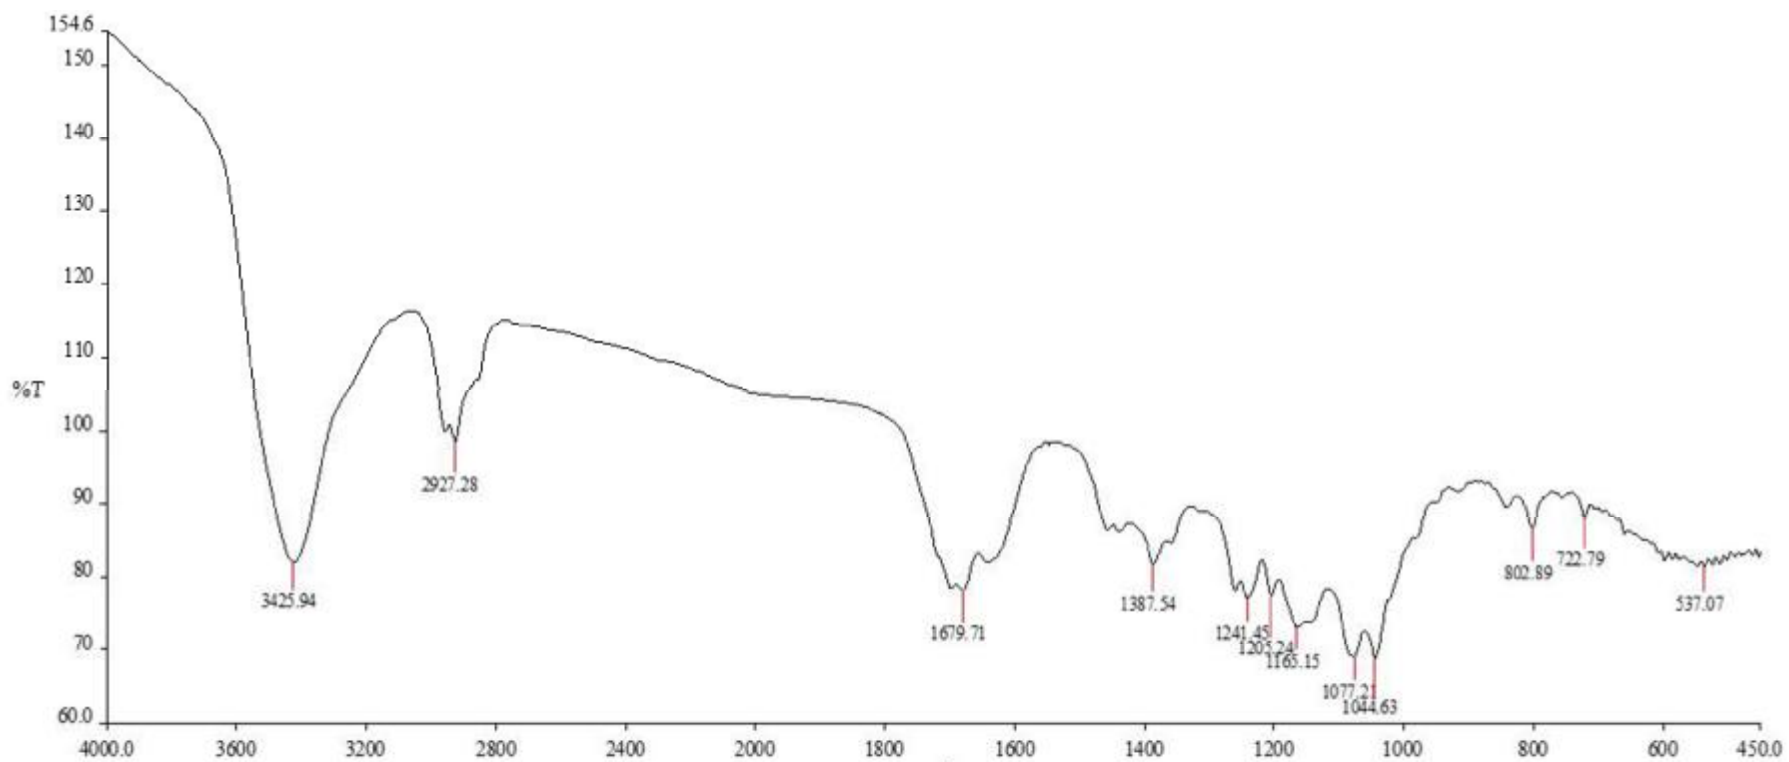



Figure S21. <sup>1</sup>H-NMR Spectrum of 16-*O*-acetyl-aesculoside G12 (4) in C<sub>5</sub>D<sub>5</sub>N.

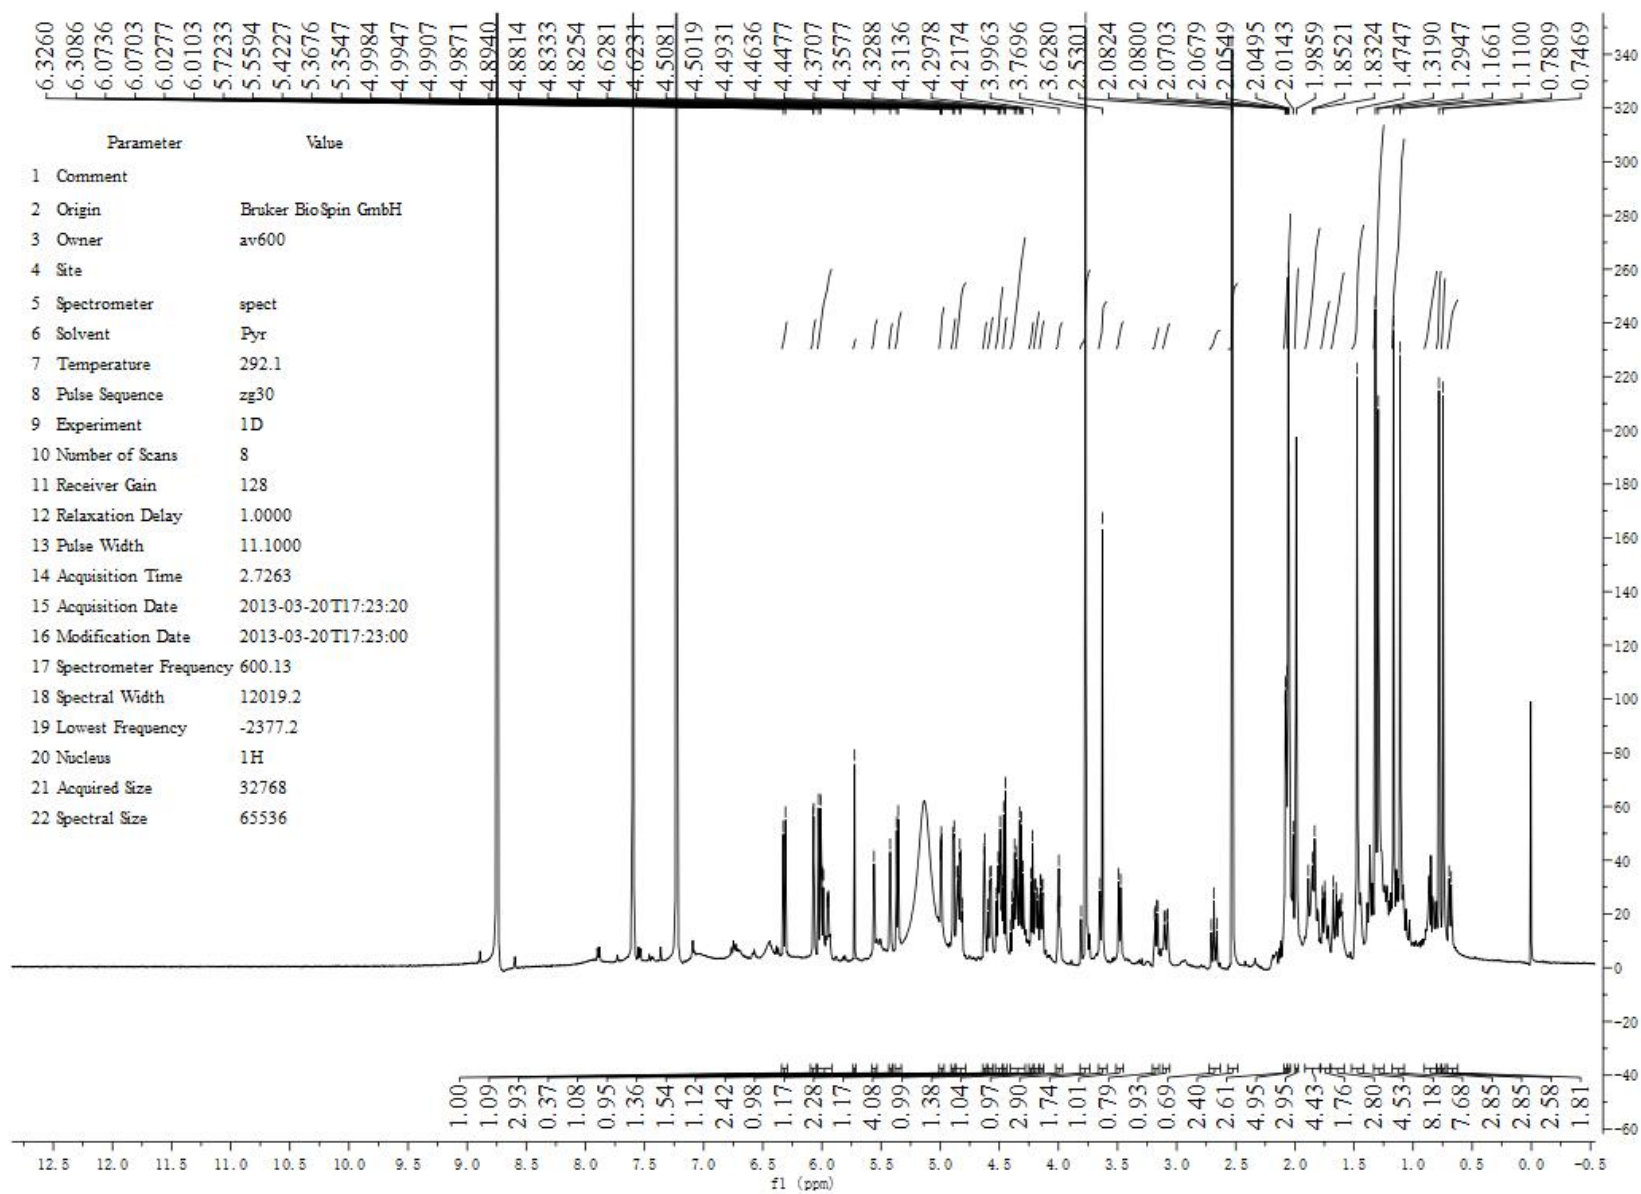

Figure S22.  $^{13}\text{C}$ -NMR Spectrum of 16-*O*-acetyl-aesculoside G12 (4) in  $\text{C}_5\text{D}_5\text{N}$ .

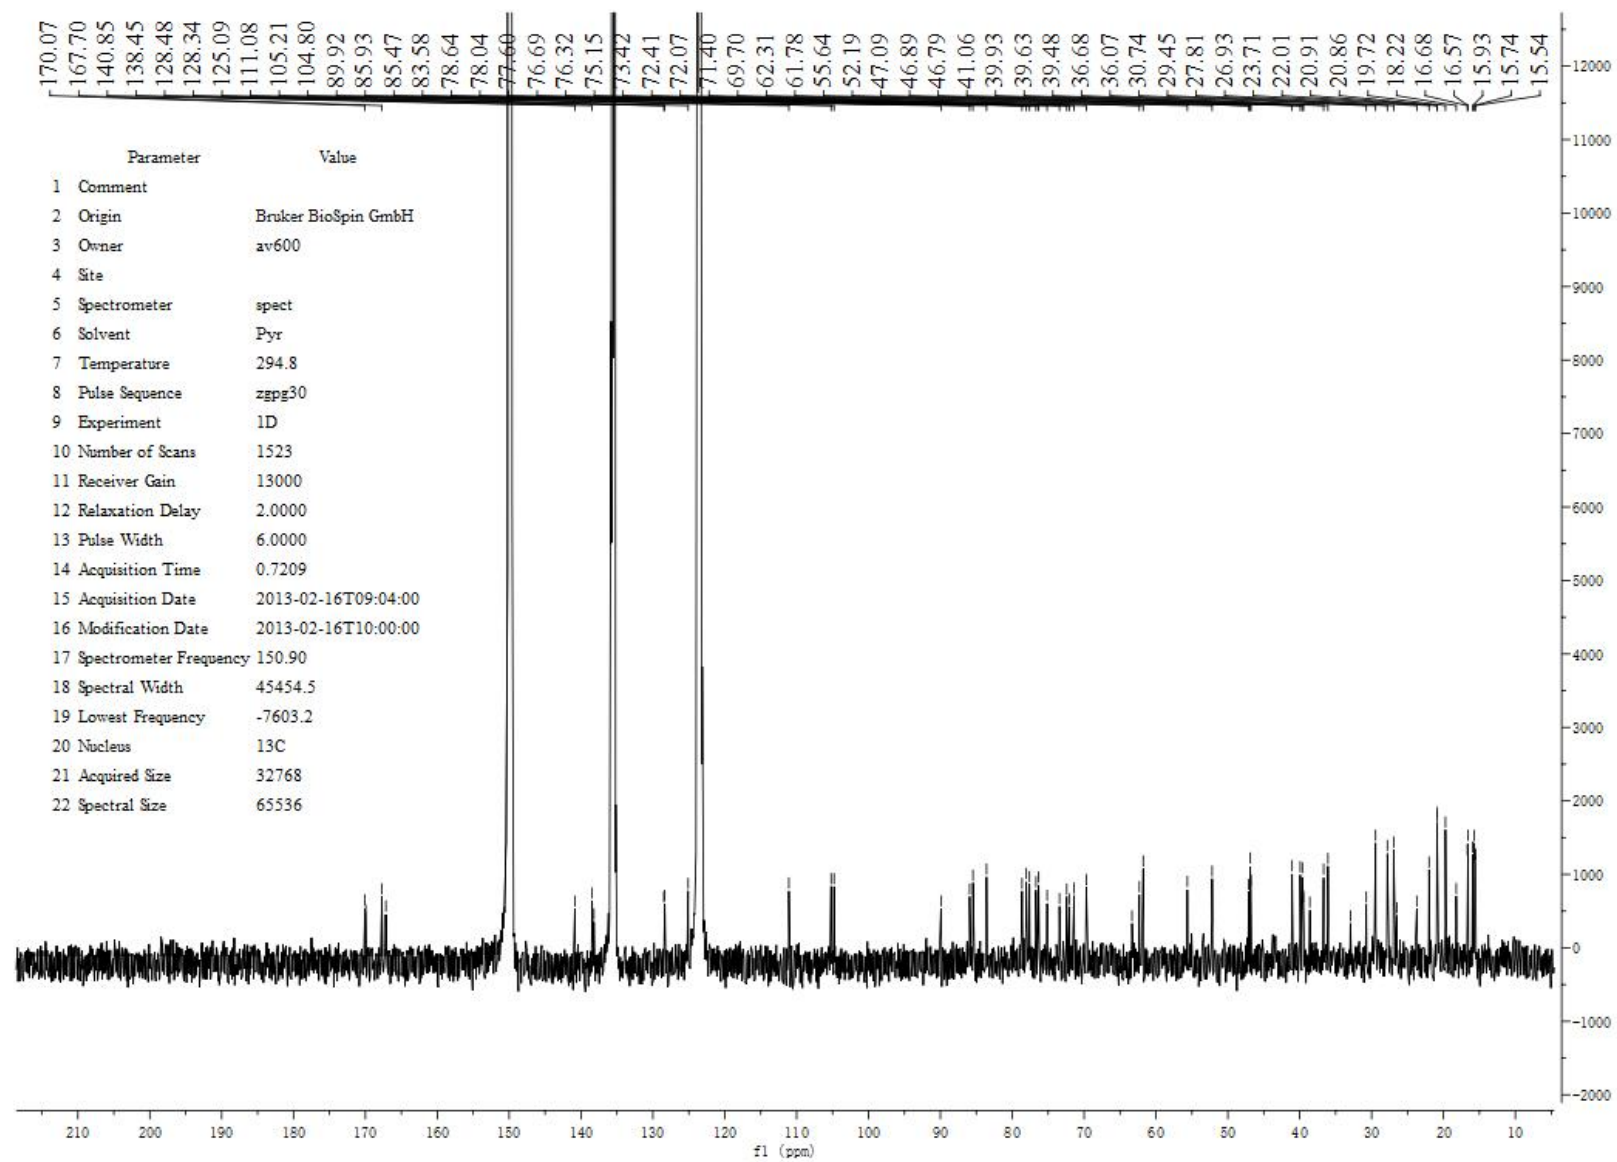

Figure S23. HR-ESI-MS Spectrum of 16-O-acetyl-aesculoside G12 (4).

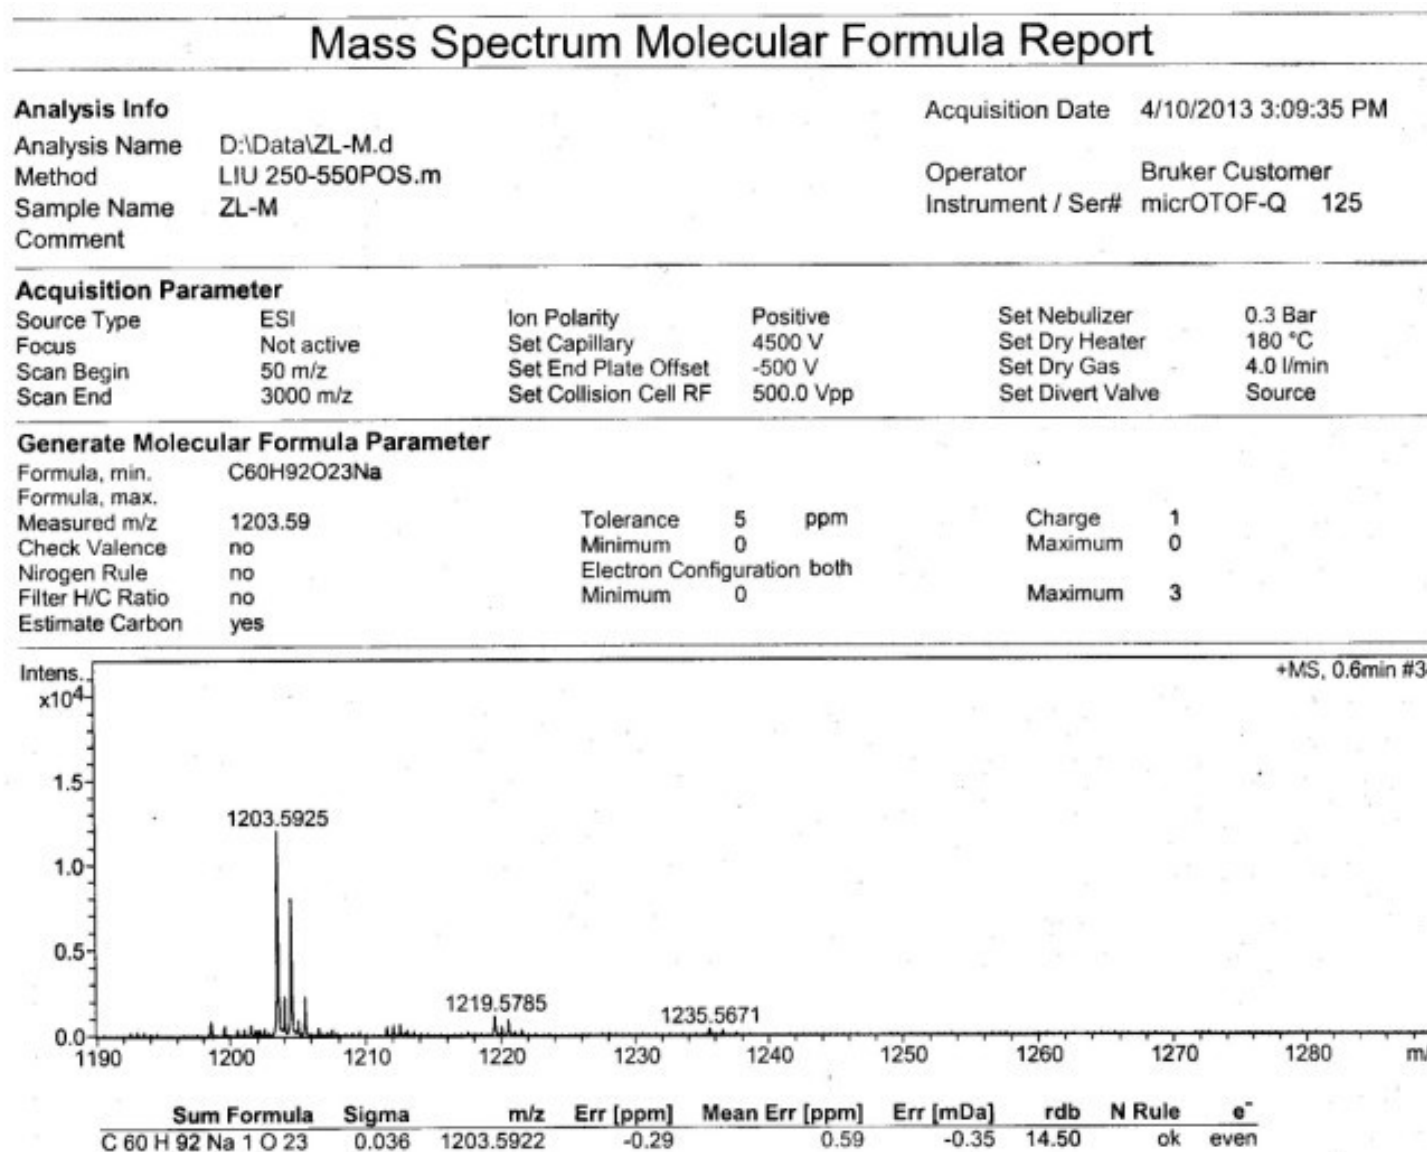

Figure S24. HMBC Spectrum of 16-*O*-acetyl-aesculoside G12 (4) in C<sub>5</sub>D<sub>5</sub>N.

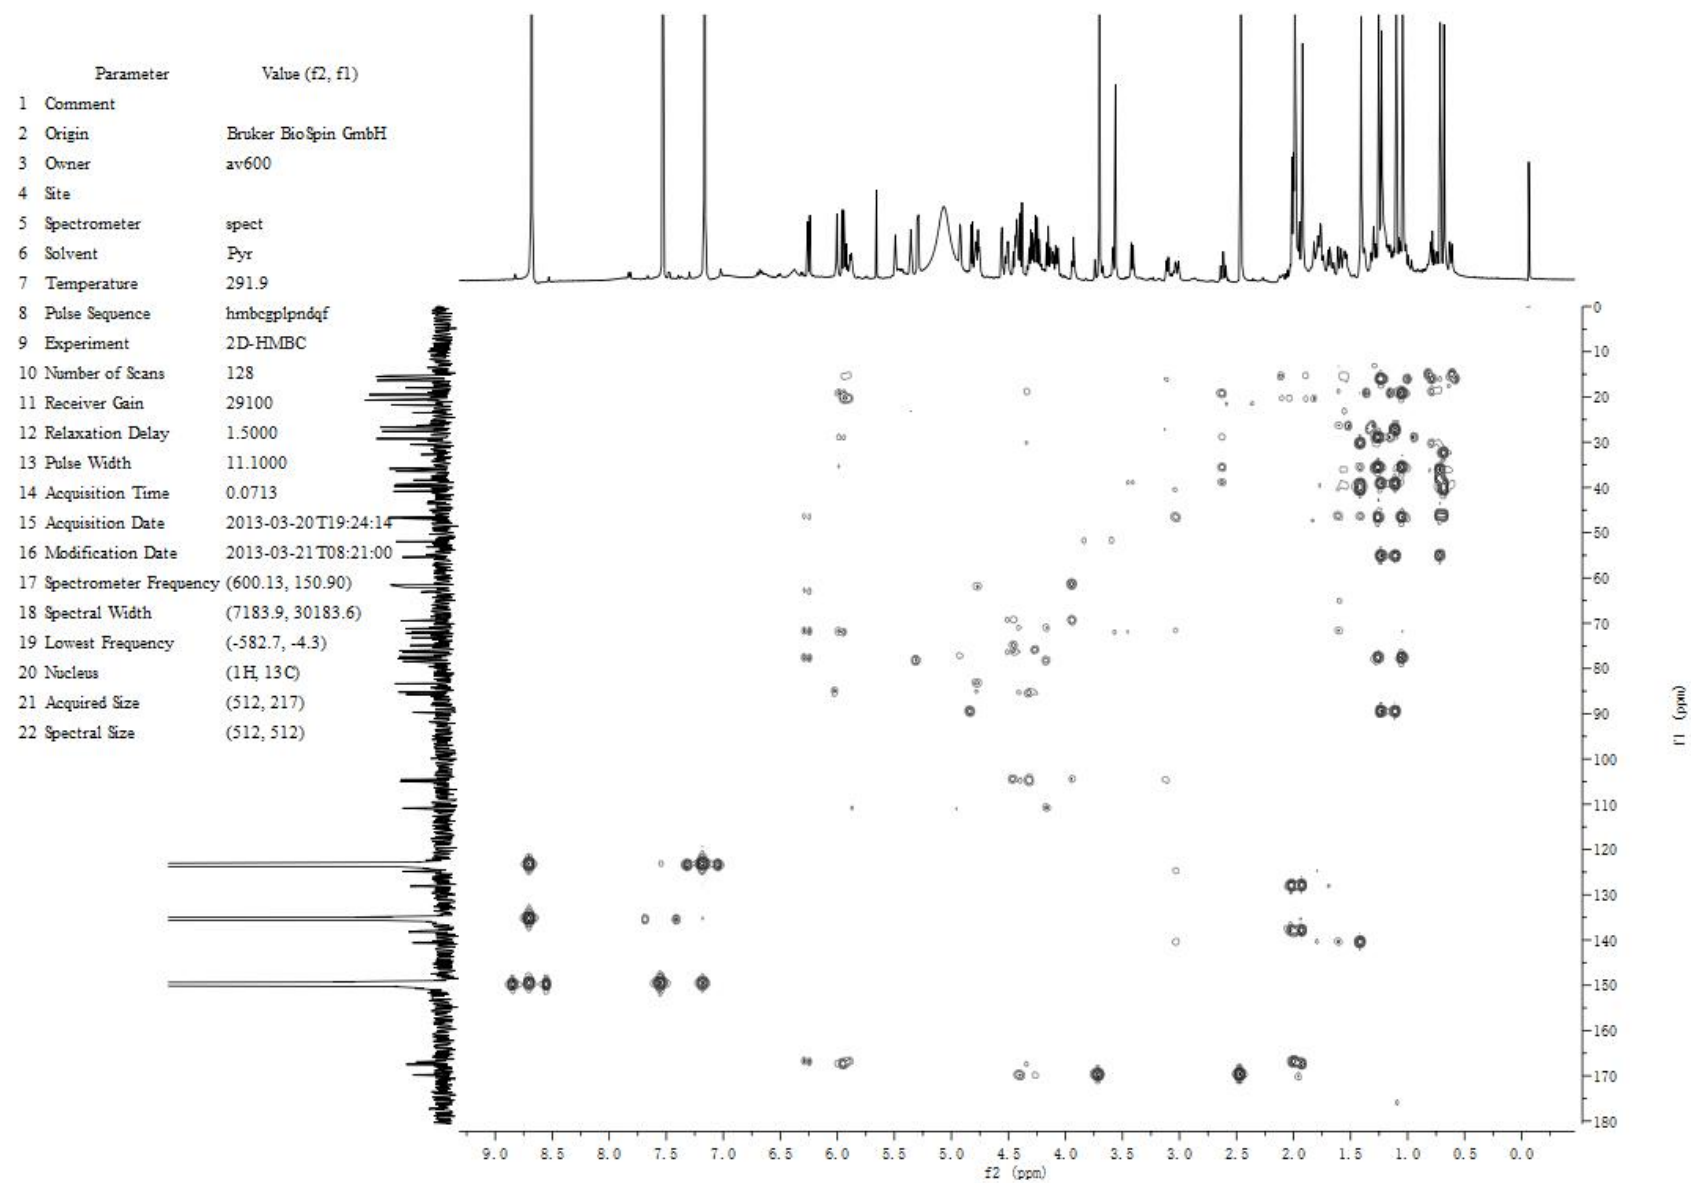

Figure S25. HSQC Spectrum of 16-*O*-acetyl-aesculioside G12 (4) in C<sub>5</sub>D<sub>5</sub>N.

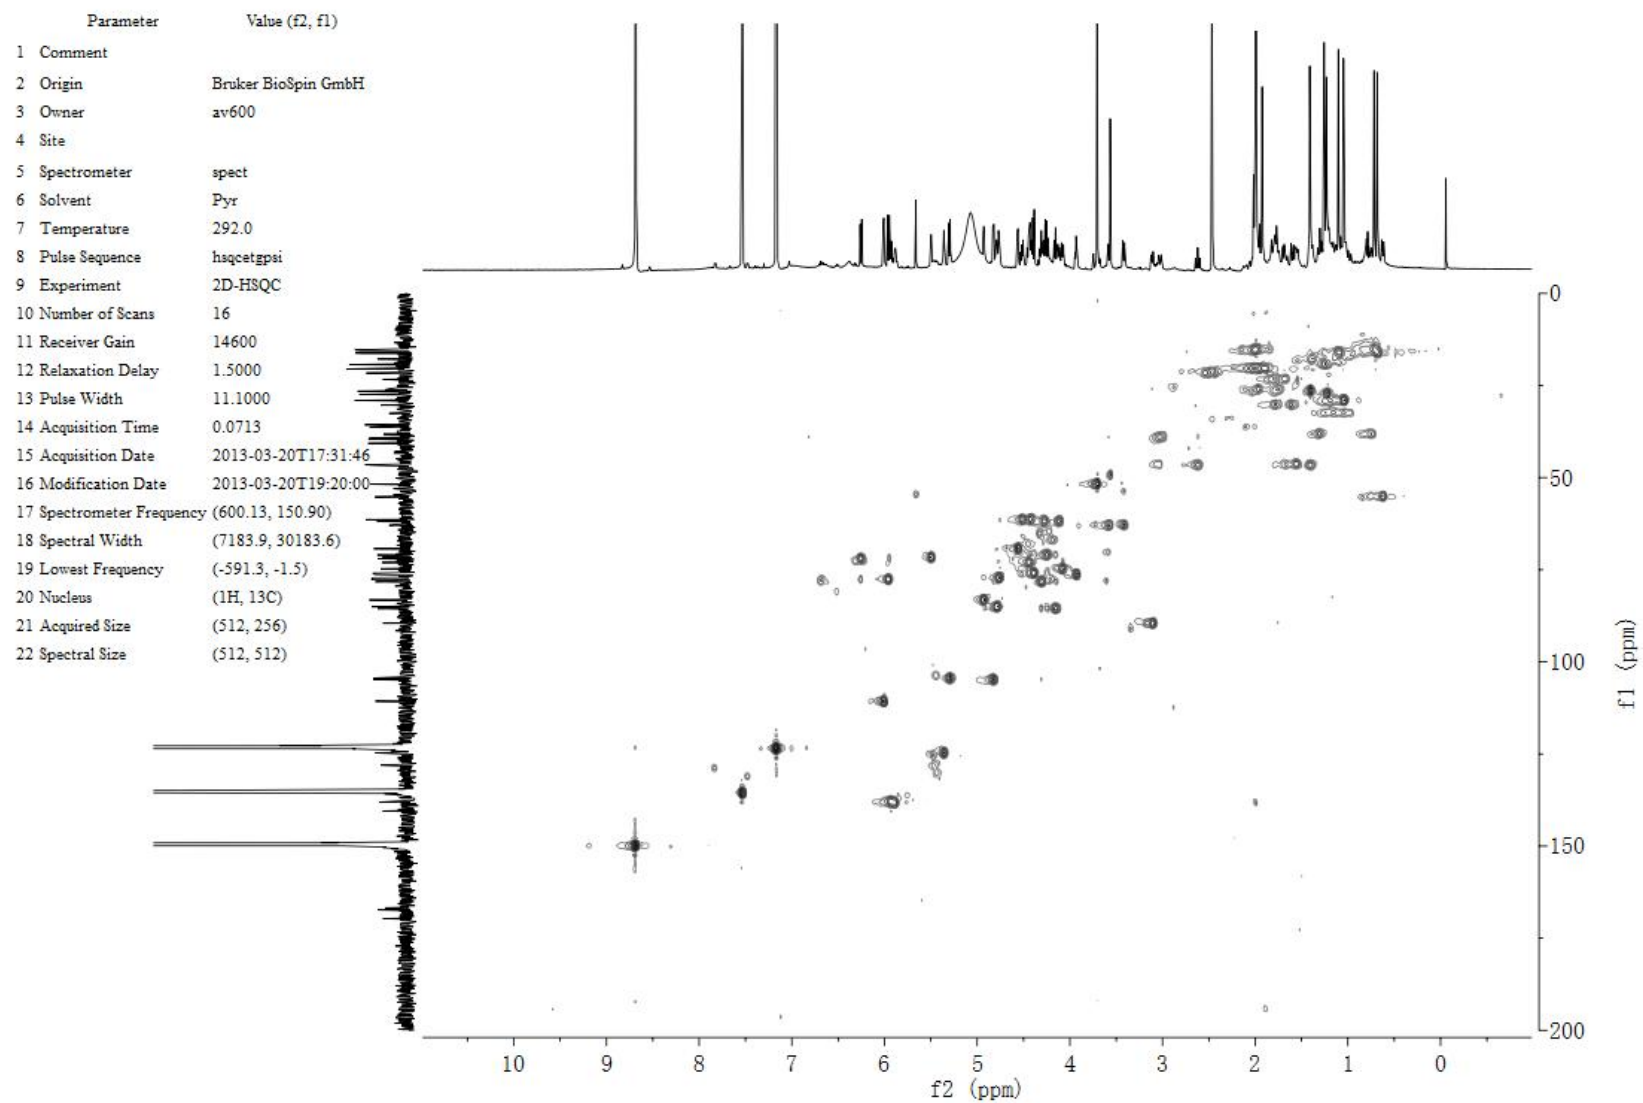

Figure S26. NOESY spectrum of 16-*O*-acetyl-aesculoside G12 (4) in C<sub>5</sub>D<sub>5</sub>N.

| Parameter                 | Value (f2, f1)      |
|---------------------------|---------------------|
| 1 Comment                 |                     |
| 2 Origin                  | Bruker BioSpin GmbH |
| 3 Owner                   | nmr                 |
| 4 Site                    |                     |
| 5 Spectrometer            | spect               |
| 6 Solvent                 | Pyr                 |
| 7 Temperature             | 297.9               |
| 8 Pulse Sequence          | noesygpqhpp         |
| 9 Experiment              | 2D-NOESY            |
| 10 Number of Scans        | 8                   |
| 11 Receiver Gain          | 88                  |
| 12 Relaxation Delay       | 2.0000              |
| 13 Pulse Width            | 11.7300             |
| 14 Acquisition Time       | 0.1671              |
| 15 Acquisition Date       | 2013-04-16T16:23:22 |
| 16 Modification Date      | 2013-04-16T18:12:48 |
| 17 Spectrometer Frequency | (600.13, 600.13)    |
| 18 Spectral Width         | (6127.5, 6127.5)    |
| 19 Lowest Frequency       | (-301.2, -301.2)    |
| 20 Nucleus                | (1H, 1H)            |
| 21 Acquired Size          | (1024, 256)         |
| 22 Spectral Size          | (1024, 1024)        |

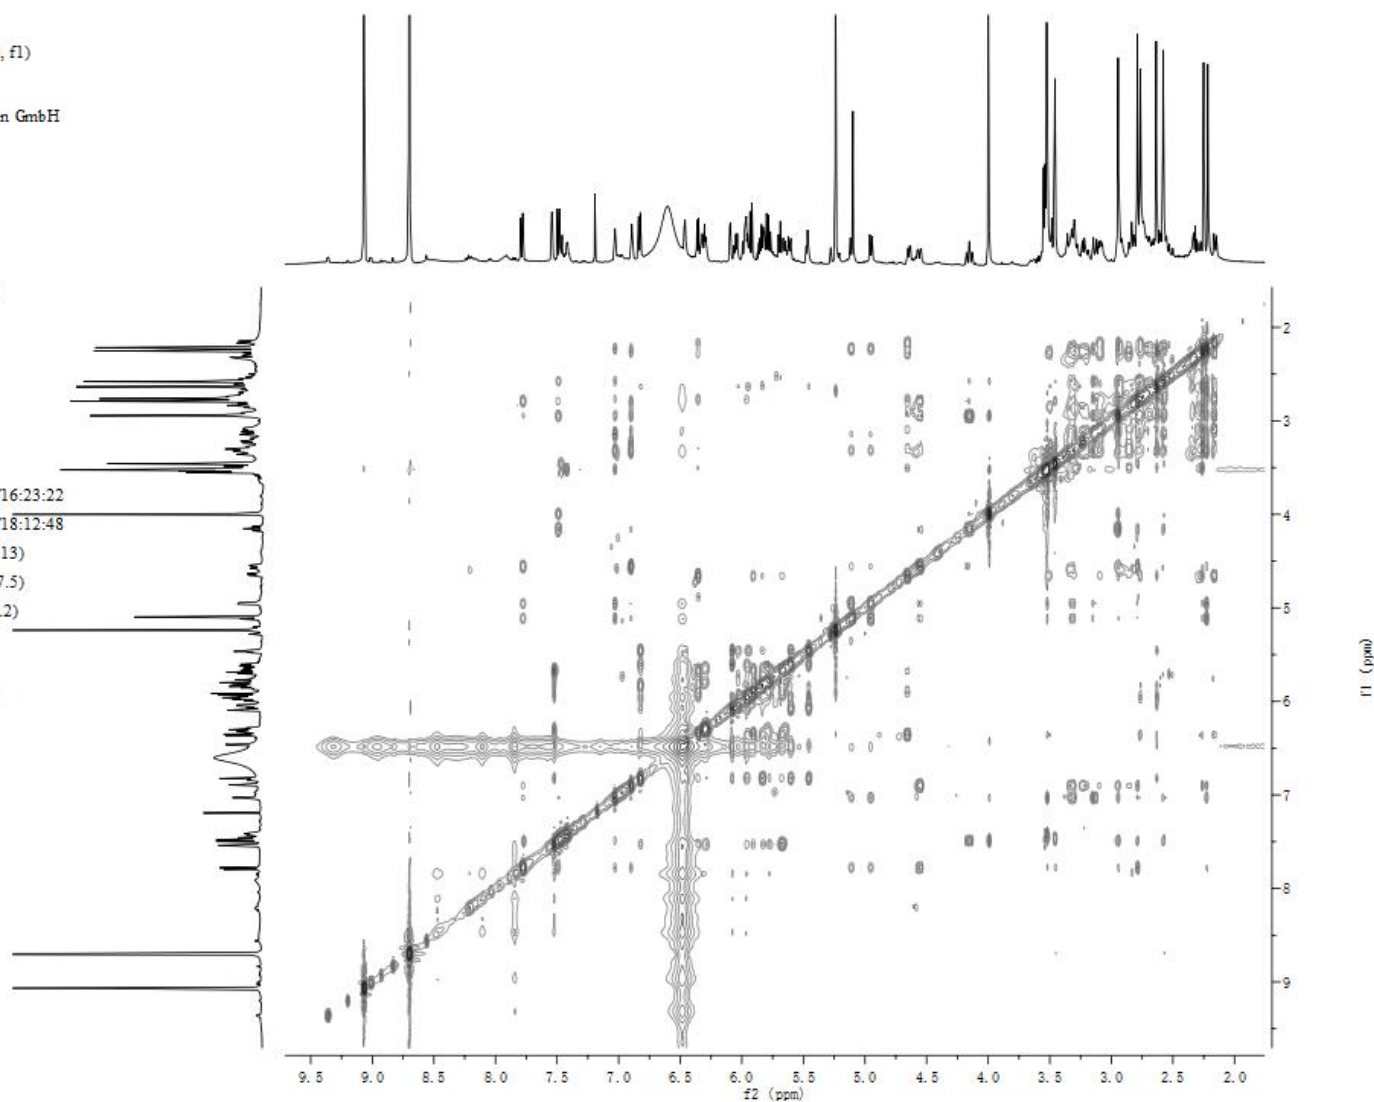



Figure S27. IR Spectrum of 16-O-acetyl-aesculoside G12 (4).

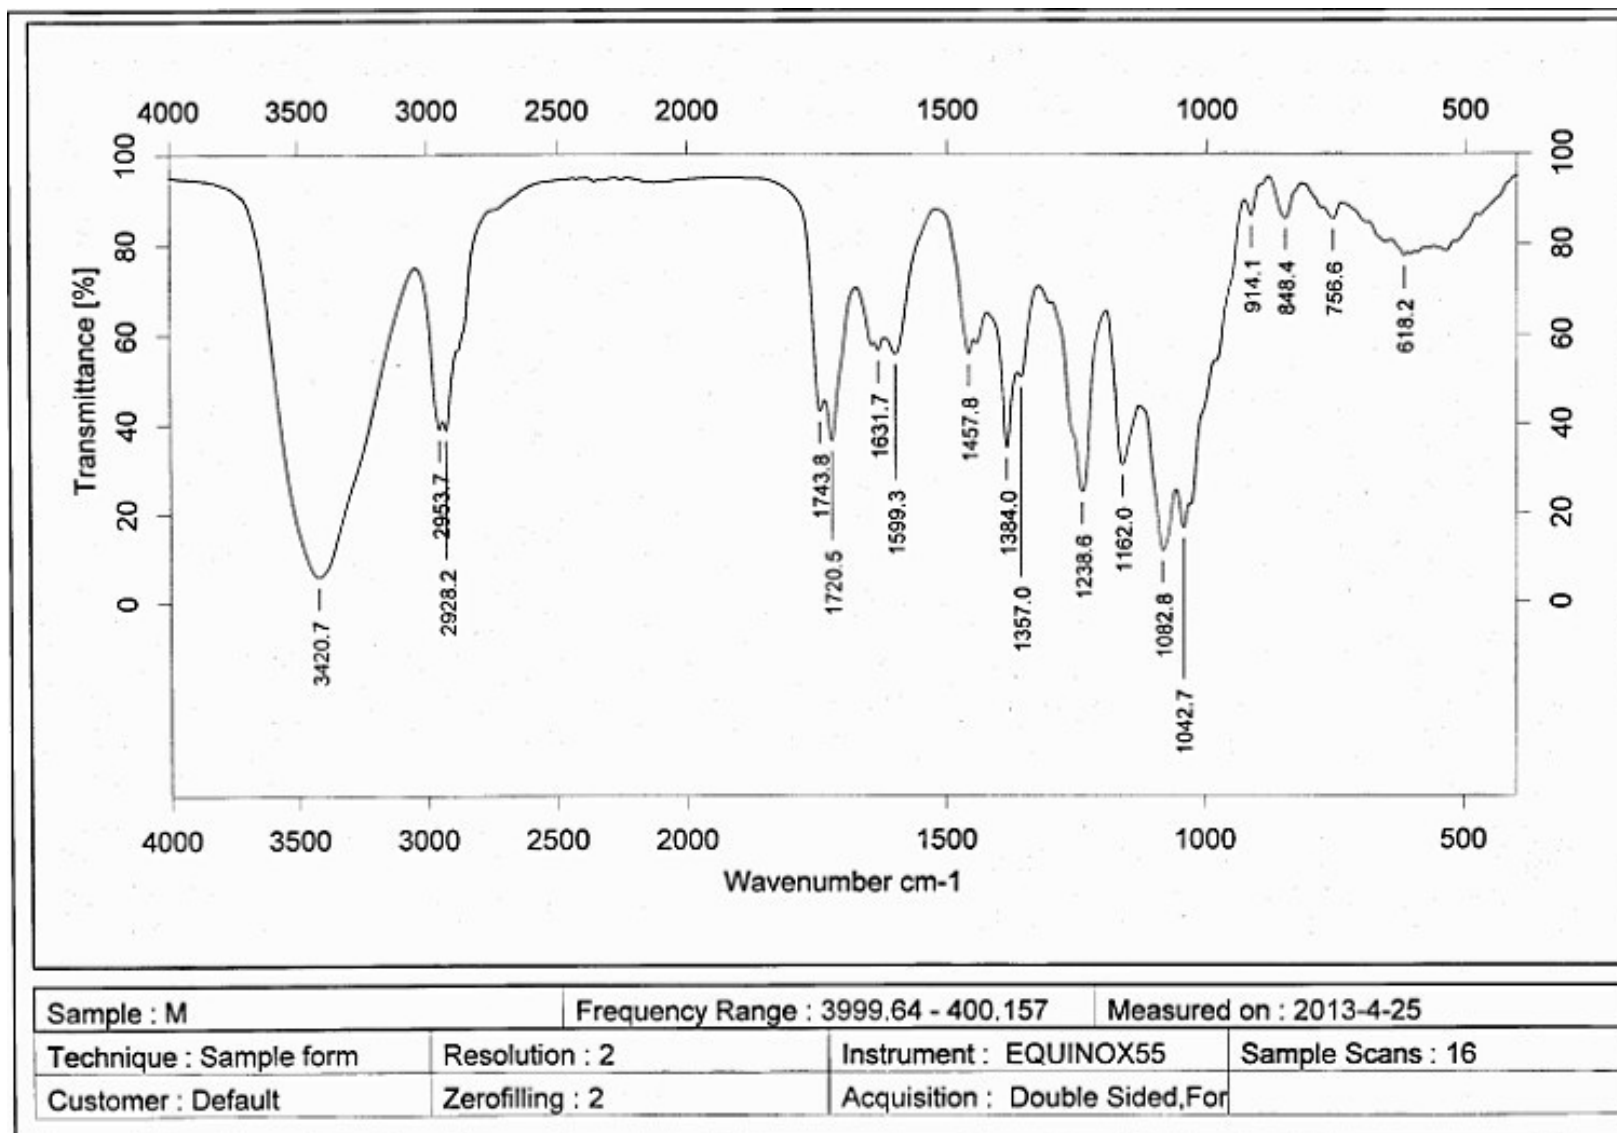

Figure S28. <sup>1</sup>H-NMR Spectrum of 3-O-[α-L-arabinofuranosyl(1→3)]-β-D-galactopyranosyl(1→2)-β-D-6'-methyl-glucuronic acid-21-O-(3''',4''''-O-diangeloyl)-β-D-fucopyranosyl-28-O-acetyl-3β, 16α, 21β, 22α, 28-pentahydroxy-olean-12-ene (5) in C<sub>5</sub>D<sub>5</sub>N.

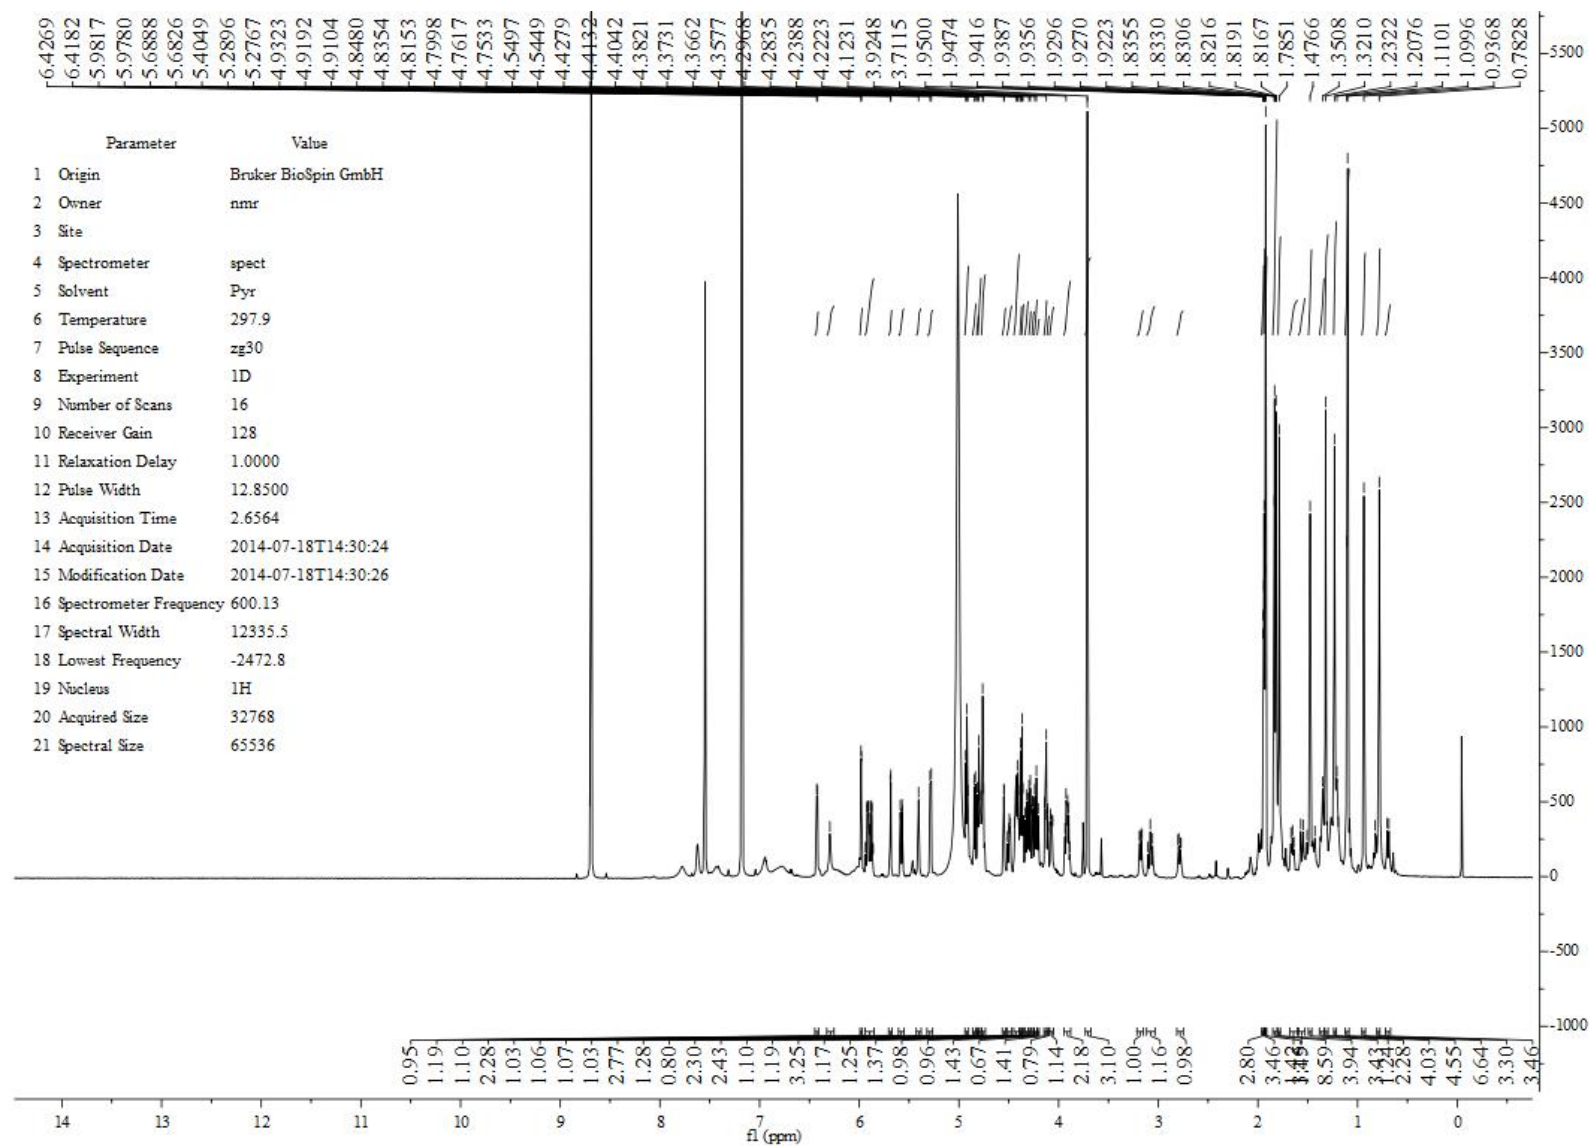



Figure S29.  $^{13}\text{C}$ -NMR Spectrum of 3-O-[ $\alpha$ -L-arabinofuranosyl(1 $\rightarrow$ 3)]- $\beta$ -D-galactopyranosyl(1 $\rightarrow$ 2)- $\beta$ -D-6'-methyl-glucuronic acid-21-O-(3''',4''''-O-diangeloyl)- $\beta$ -D-fucopyranosyl-28-O-acetyl-3 $\beta$ , 16 $\alpha$ , 21 $\beta$ , 22 $\alpha$ , 28-pentahydroxy-olean-12-ene (5) in  $\text{C}_5\text{D}_5\text{N}$ .

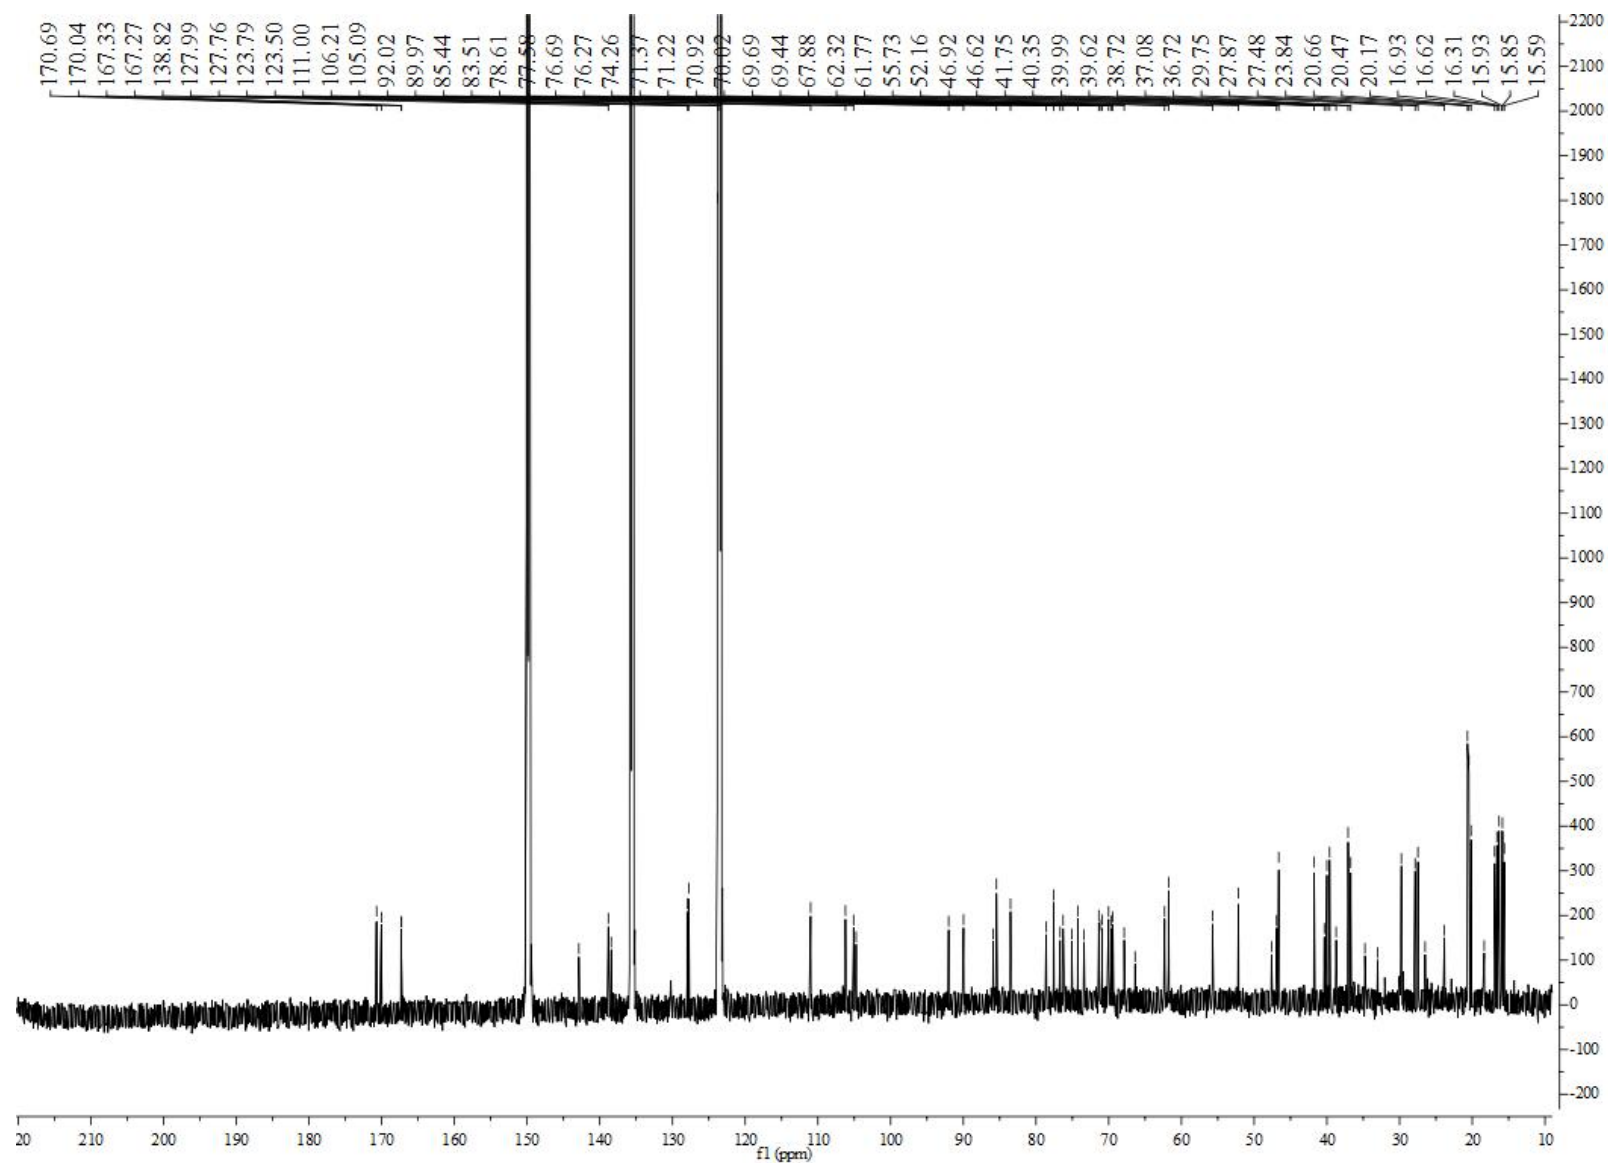

Figure S30. HR-ESI-MS Spectrum of 3-O-[ $\alpha$ -L-arabinofuranosyl(1 $\rightarrow$ 3)]- $\beta$ -D-galactopyranosyl(1 $\rightarrow$ 2)- $\beta$ -D-6'-methyl-glucuronic acid-21-O-(3''',4'''-O-diangeloyl)- $\beta$ -D-fucopyranosyl-28-O-acetyl-3 $\beta$ , 16 $\alpha$ , 21 $\beta$ , 22 $\alpha$ , 28-pentahydroxy-olean-12-ene (5).

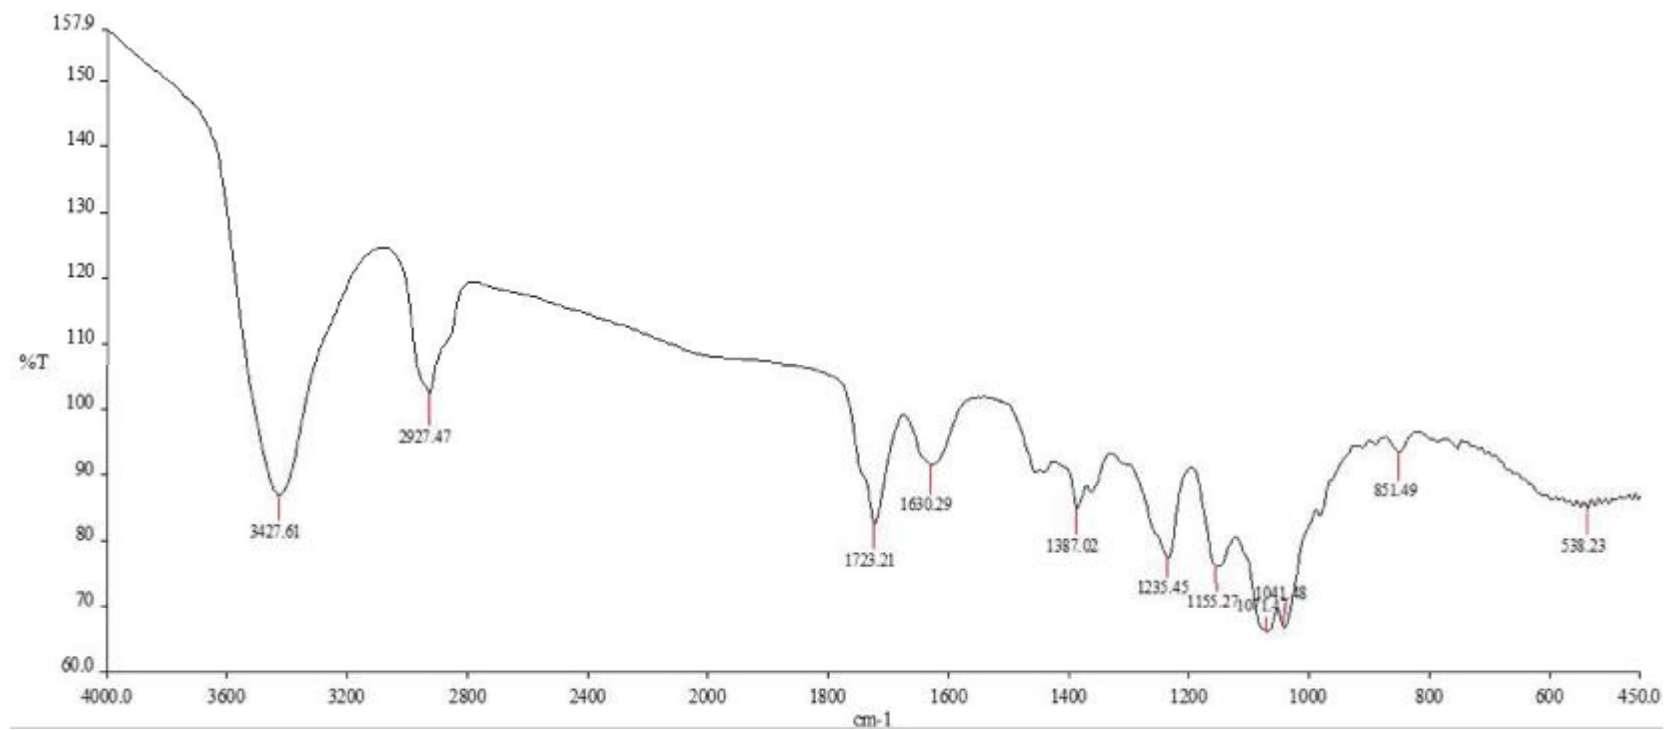

Figure S31. HMBC Spectrum of 3-O-[ $\alpha$ -L-arabinofuranosyl(1 $\rightarrow$ 3)]- $\beta$ -D-galactopyranosyl(1 $\rightarrow$ 2)- $\beta$ -D-6'-methyl-glucuronic acid-21-O-(3''',4''''-O-diangeloyl)- $\beta$ -D-fucopyranosyl-28-O-acetyl-3 $\beta$ , 16 $\alpha$ , 21 $\beta$ , 22 $\alpha$ , 28-pentahydroxy-olean-12-ene (5) in C<sub>5</sub>D<sub>5</sub>N.

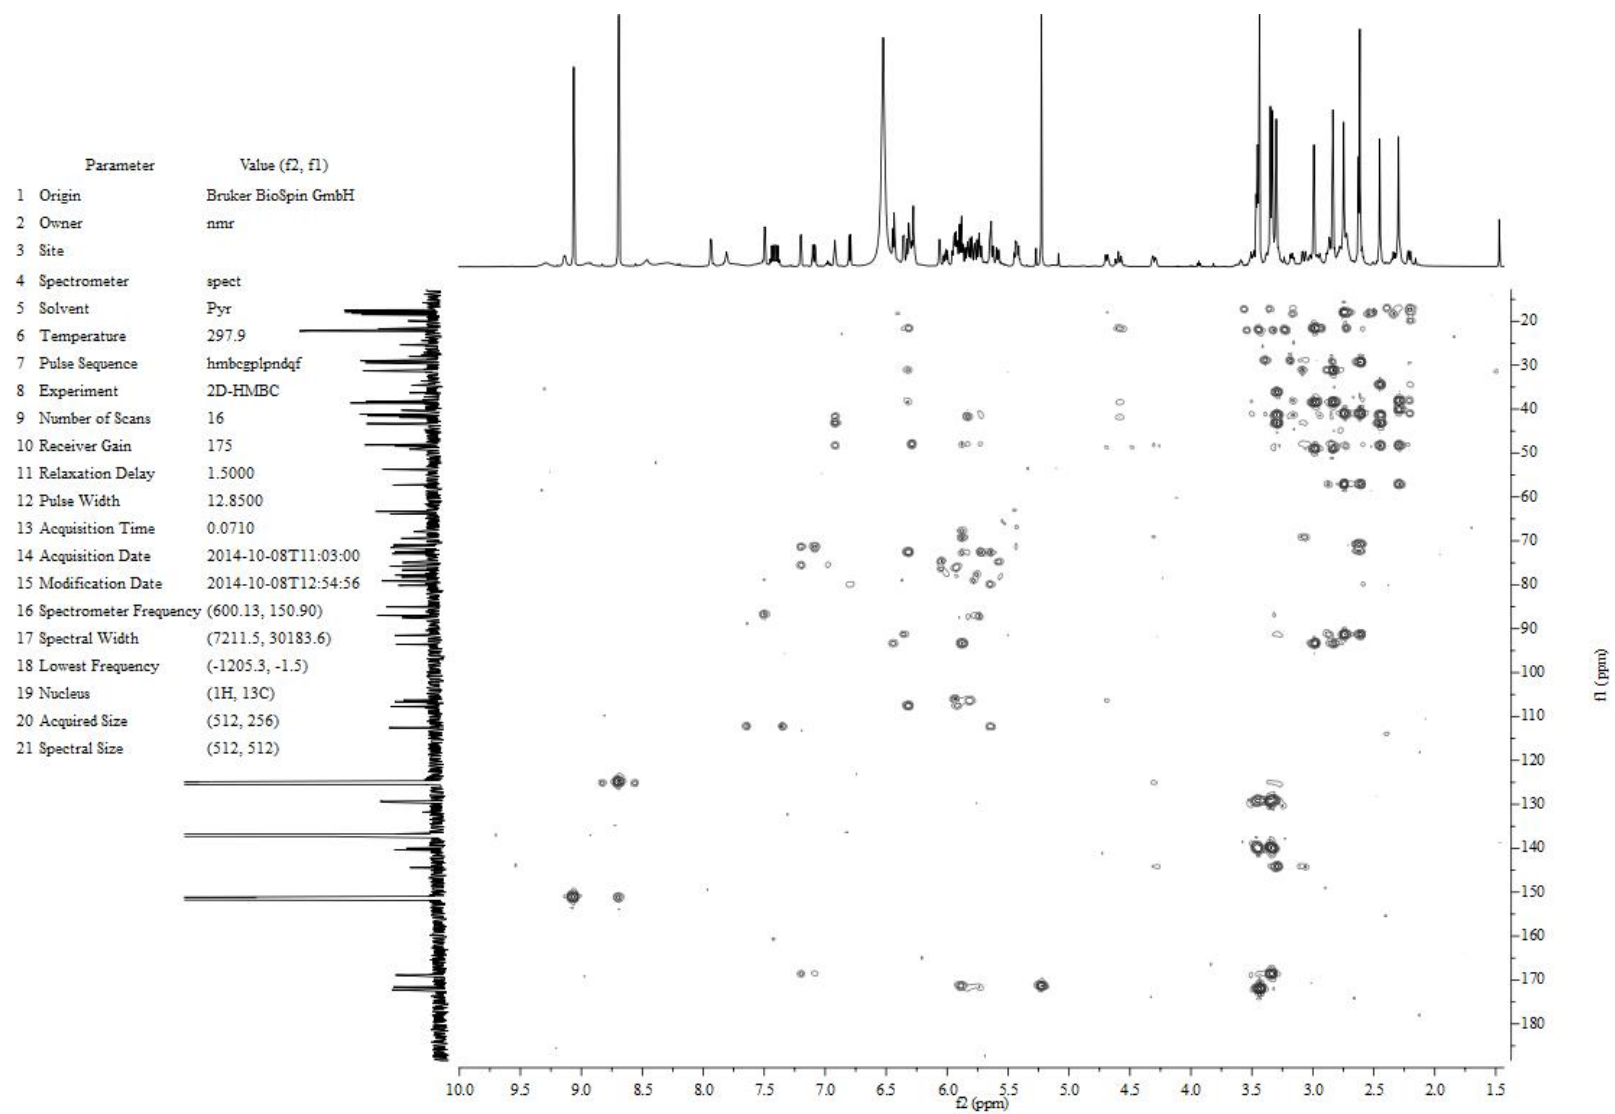

Figure S32. HSQC Spectrum of 3-O-[ $\alpha$ -L-arabinofuranosyl(1 $\rightarrow$ 3)]- $\beta$ -D-galactopyranosyl(1 $\rightarrow$ 2)- $\beta$ -D-6'-methyl-glucuronic acid-21-O-(3''',4''''-O-diangeloyl)- $\beta$ -D-fucopyranosyl-28-O-acetyl-3 $\beta$ , 16 $\alpha$ , 21 $\beta$ , 22 $\alpha$ , 28-pentahydroxy-olean-12-ene (5) in C<sub>5</sub>D<sub>5</sub>N.

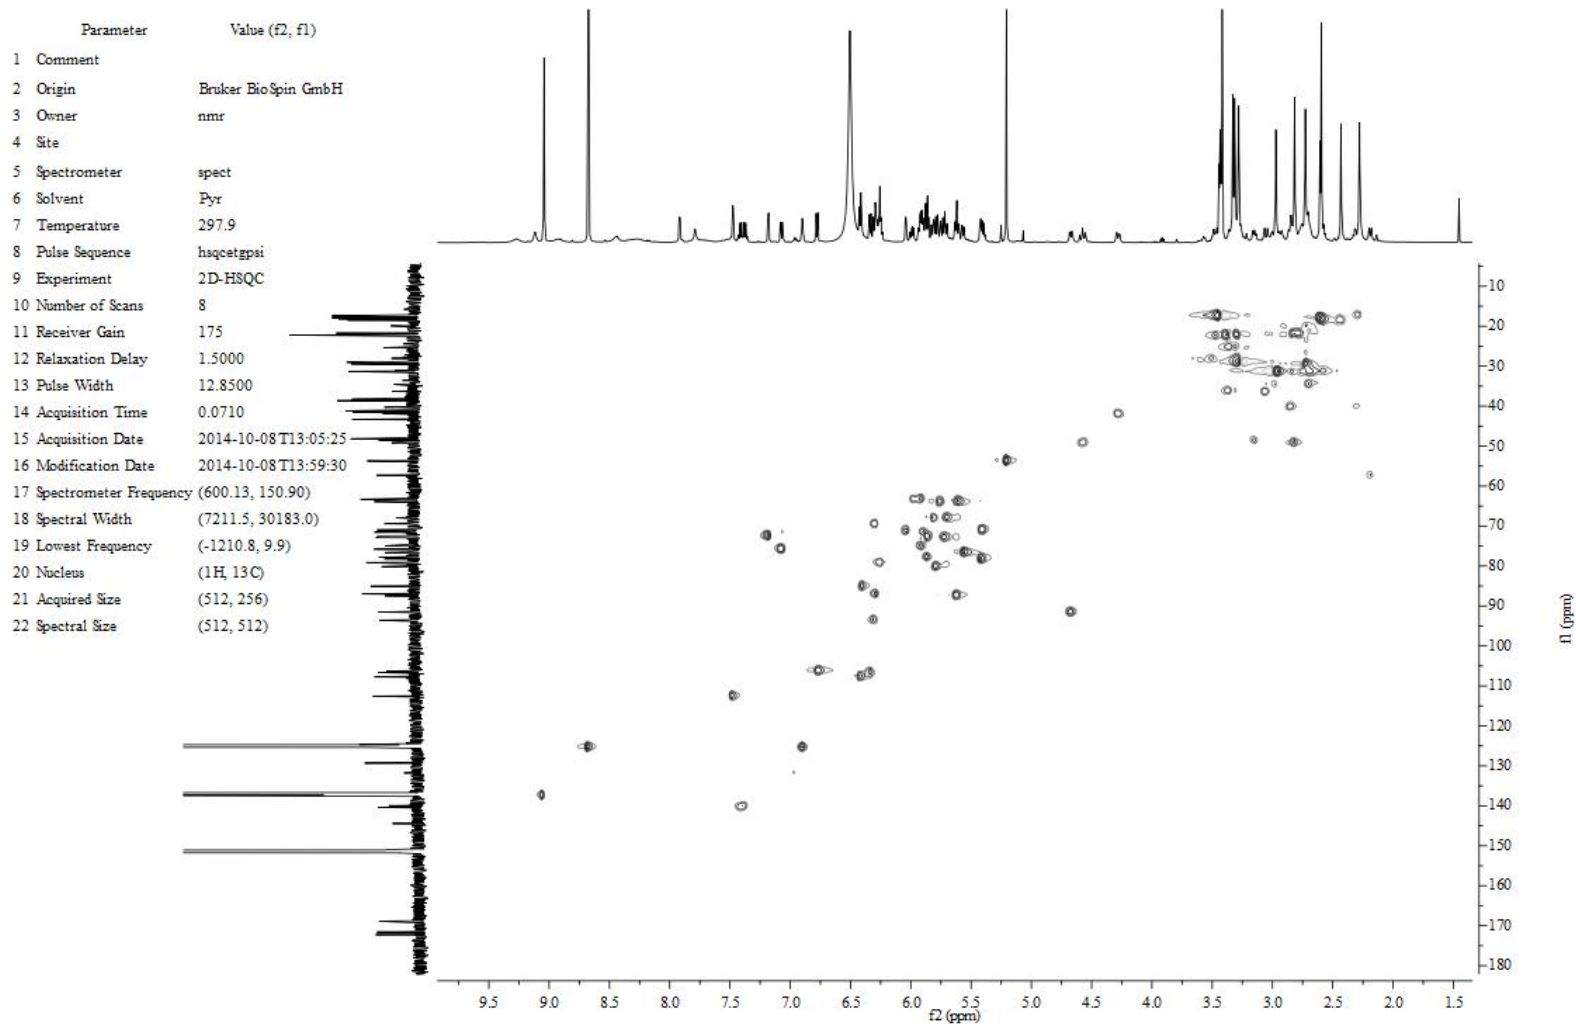

Figure S33. IR Spectrum of 3-O-[ $\alpha$ -L-arabinofuranosyl(1 $\rightarrow$ 3)]- $\beta$ -D-galactopyranosyl(1 $\rightarrow$ 2)- $\beta$ -D-6'-methyl-glucuronic acid-21-O-(3''',4''''-O-diangeloyl)- $\beta$ -D-fucopyranosyl-28-O-acetyl-3 $\beta$ , 16 $\alpha$ , 21 $\beta$ , 22 $\alpha$ , 28-pentahydroxy-olean-12-ene (5) in C<sub>5</sub>D<sub>5</sub>N.

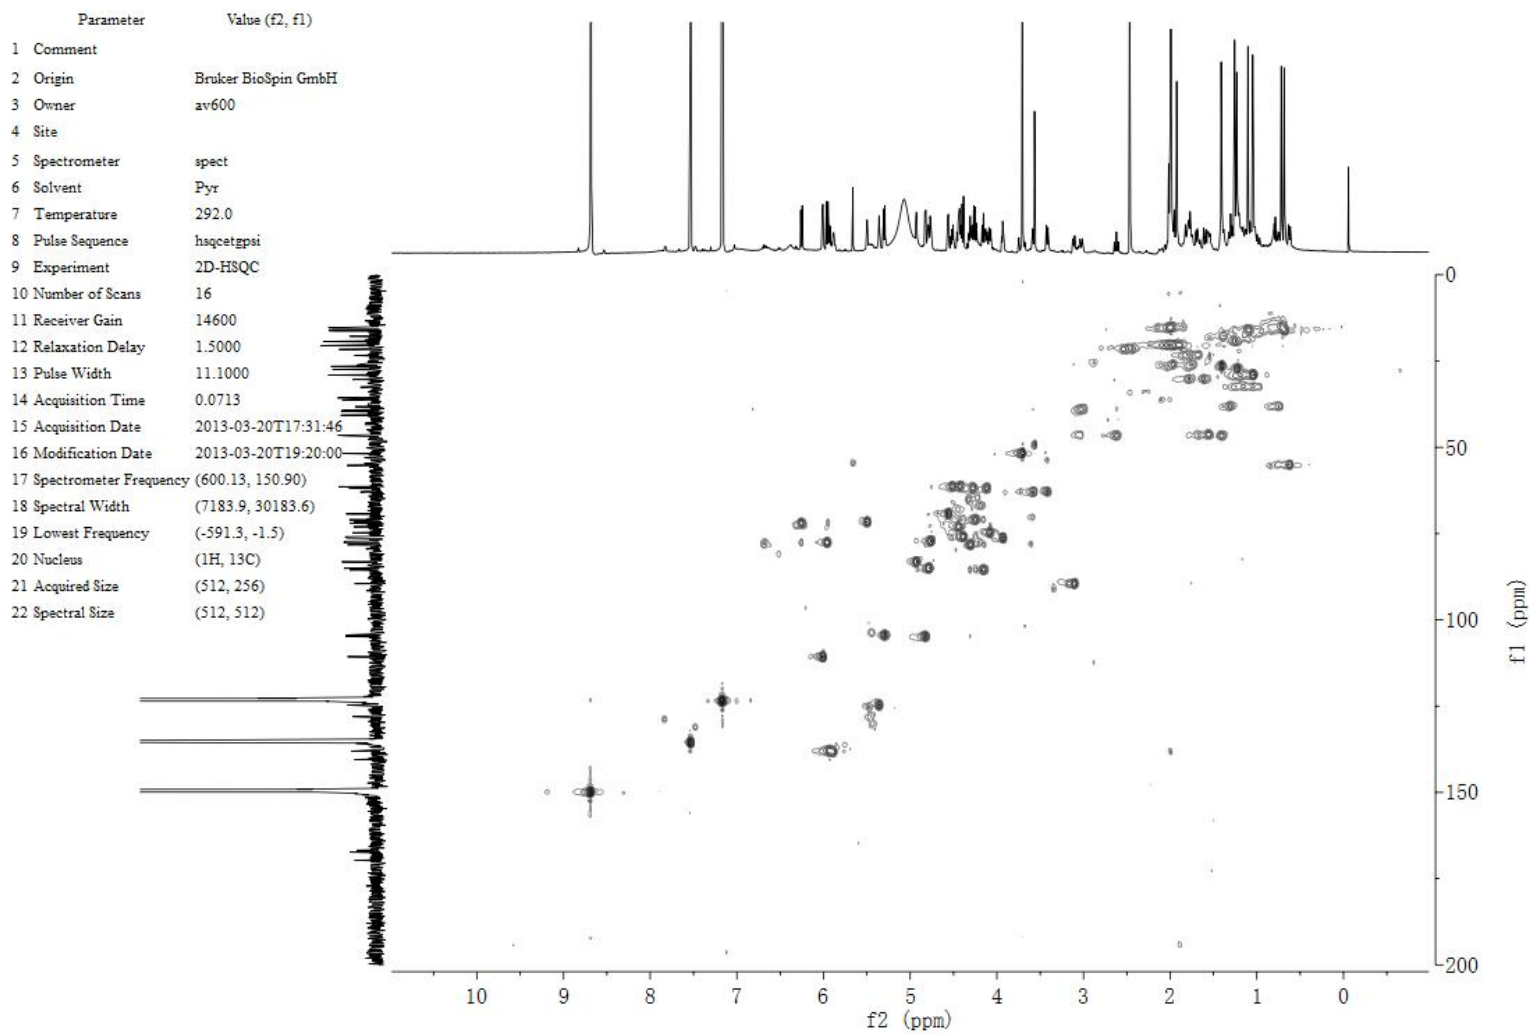

Figure S34. <sup>1</sup>H-NMR Spectrum of 6'-methyl ester-O-Xanifolia-Y2 (6) in C<sub>5</sub>D<sub>5</sub>N.

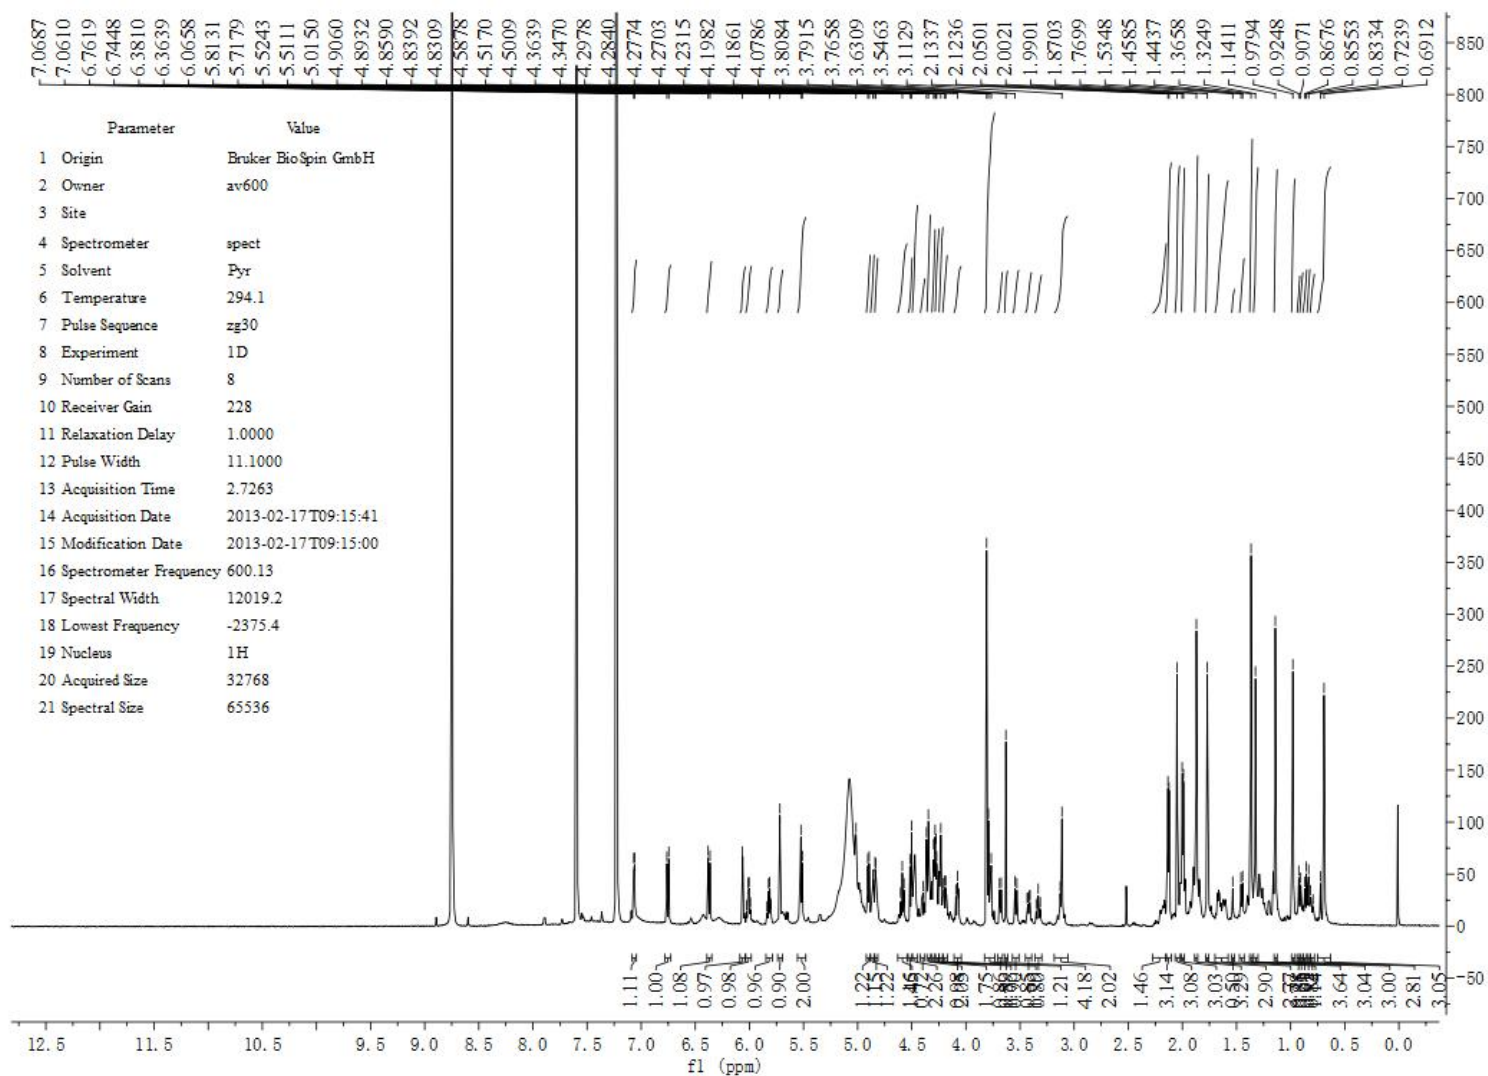

Figure S35.  $^{13}\text{C}$ -NMR Spectrum of 6'-methylster-O-Xanifolia-Y2 (6) in  $\text{C}_5\text{D}_5\text{N}$ .

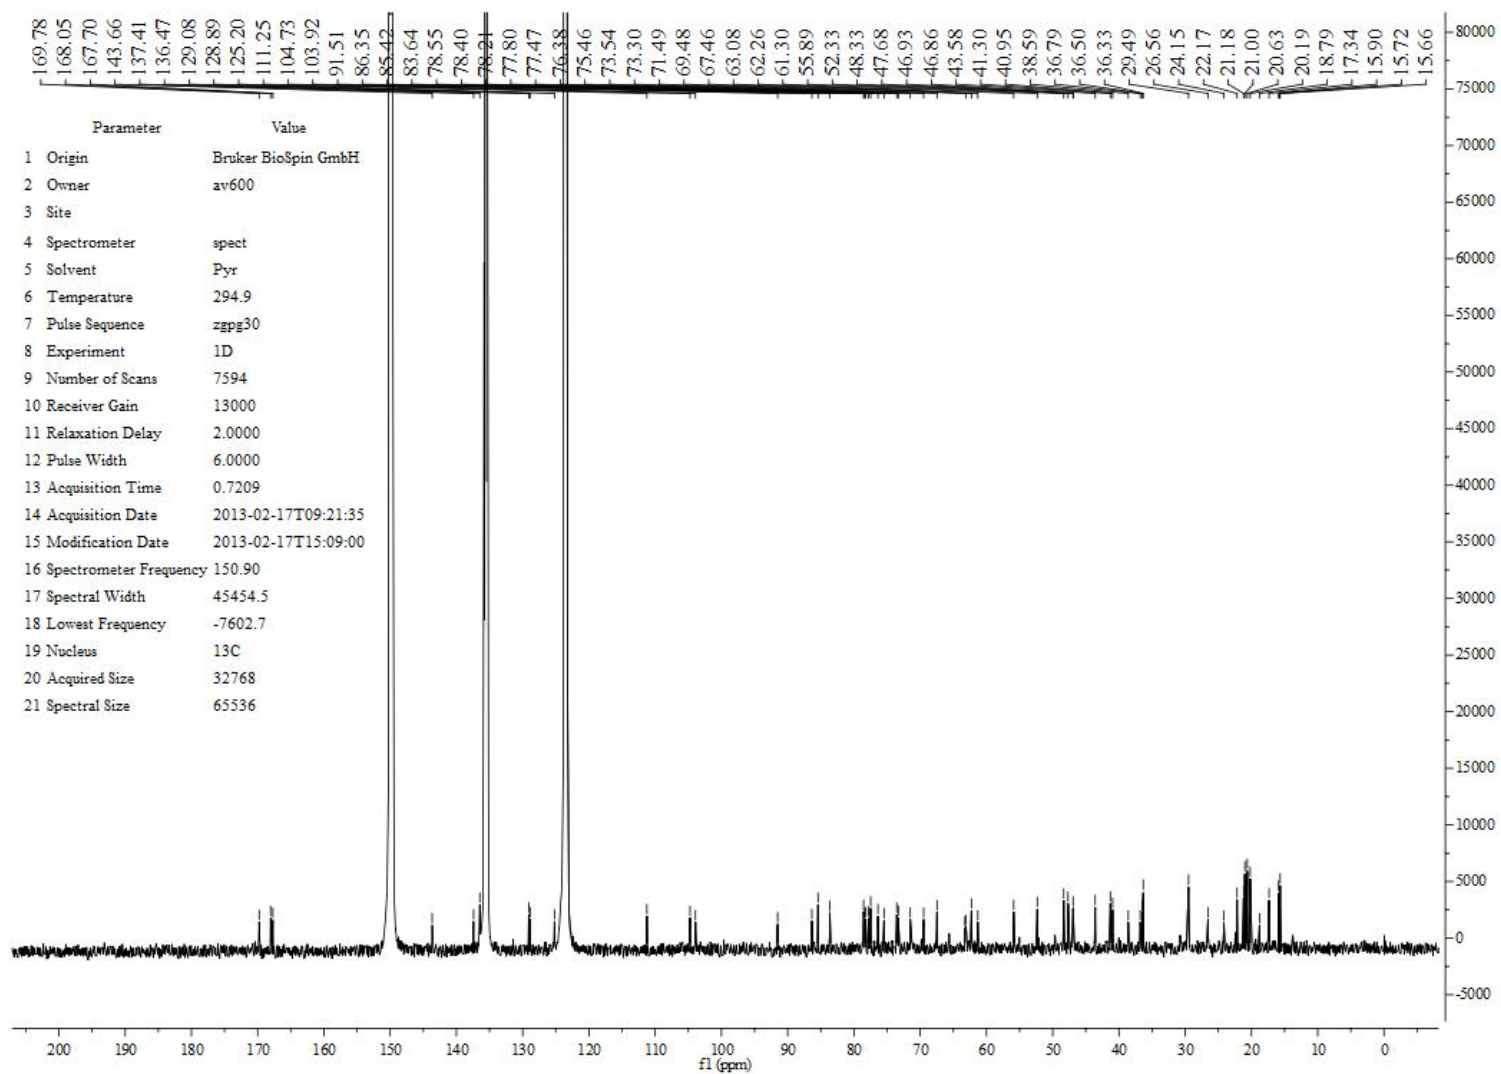



Figure S36. HR-ESI-MS Spectrum of 6'-methylester-O-Xanifolia-Y2 (6).

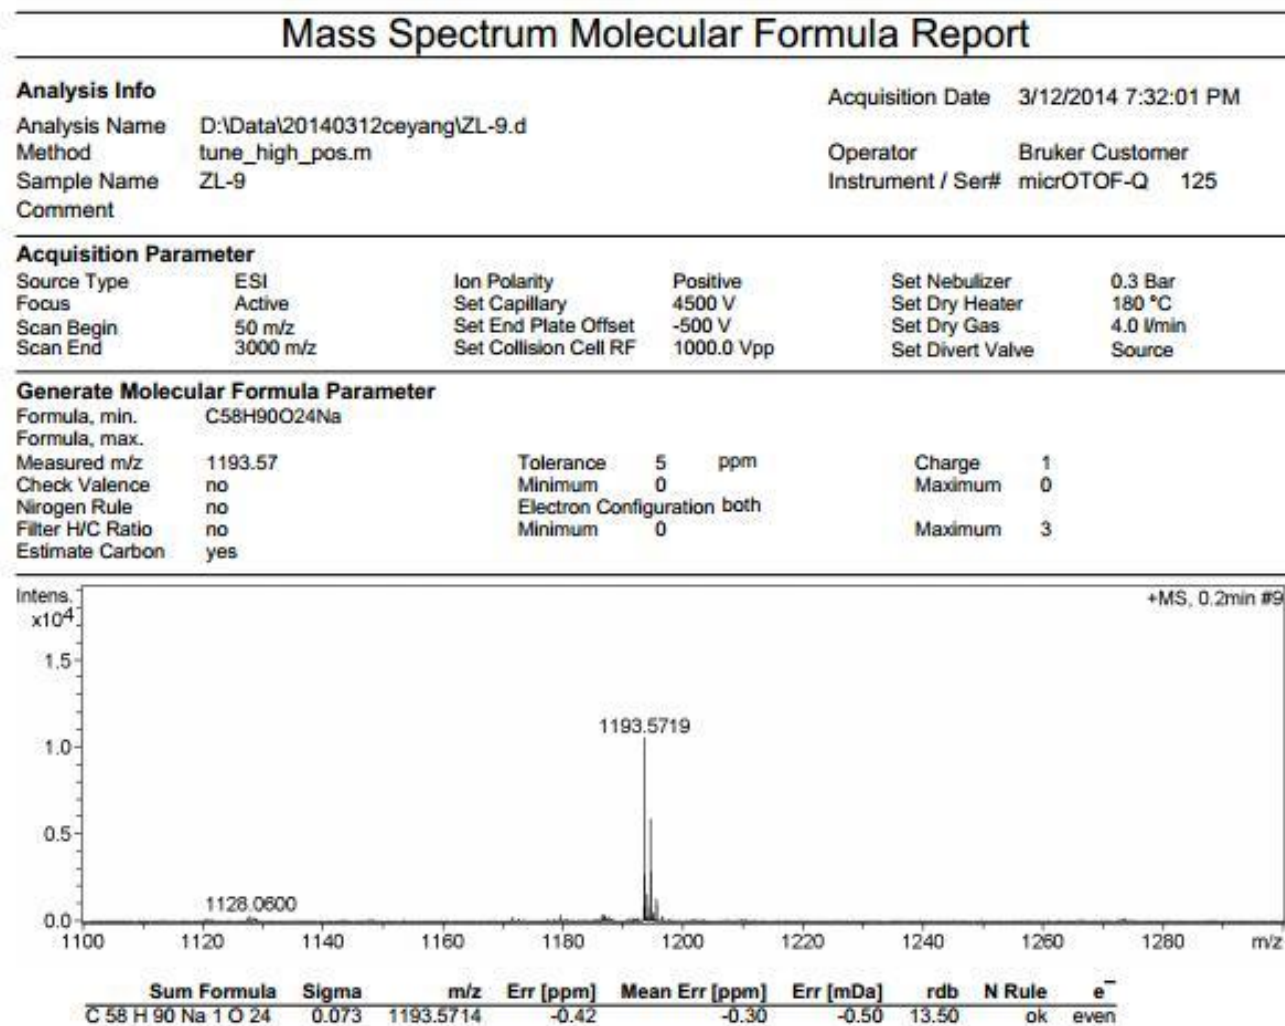



Figure S37. HMBC Spectrum of 6'-methylester-O-Xanifolia-Y2 (6) in C<sub>5</sub>D<sub>5</sub>N.

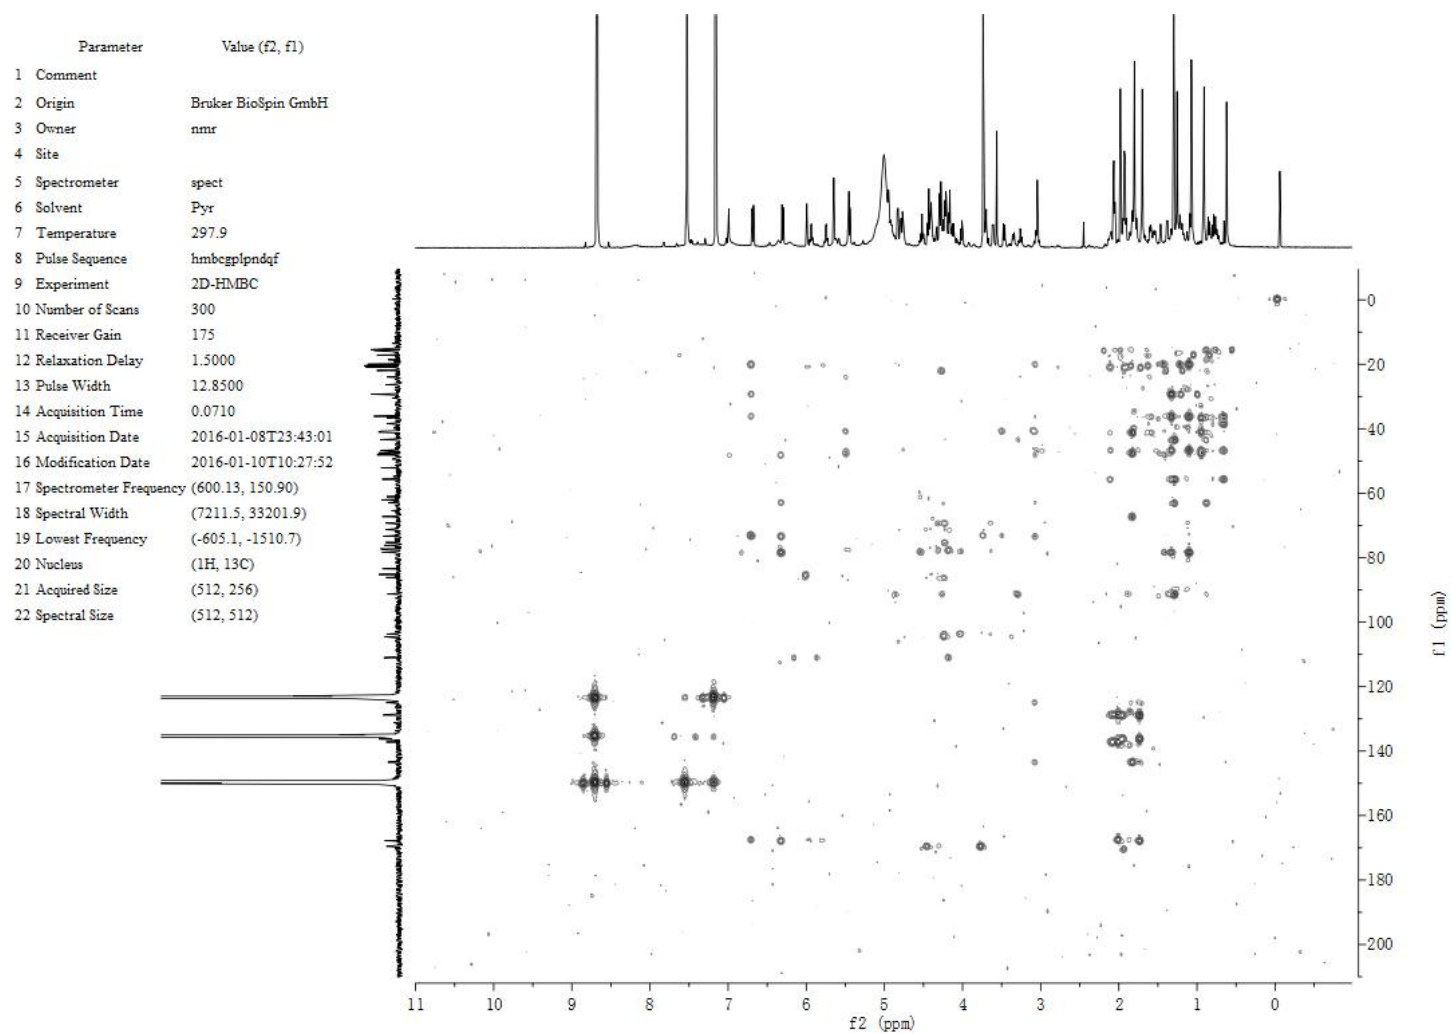

Figure S38. HSQC Spectrum of 6'-methylene-O-Xanifolia-Y2 (6) in C<sub>5</sub>D<sub>5</sub>N.

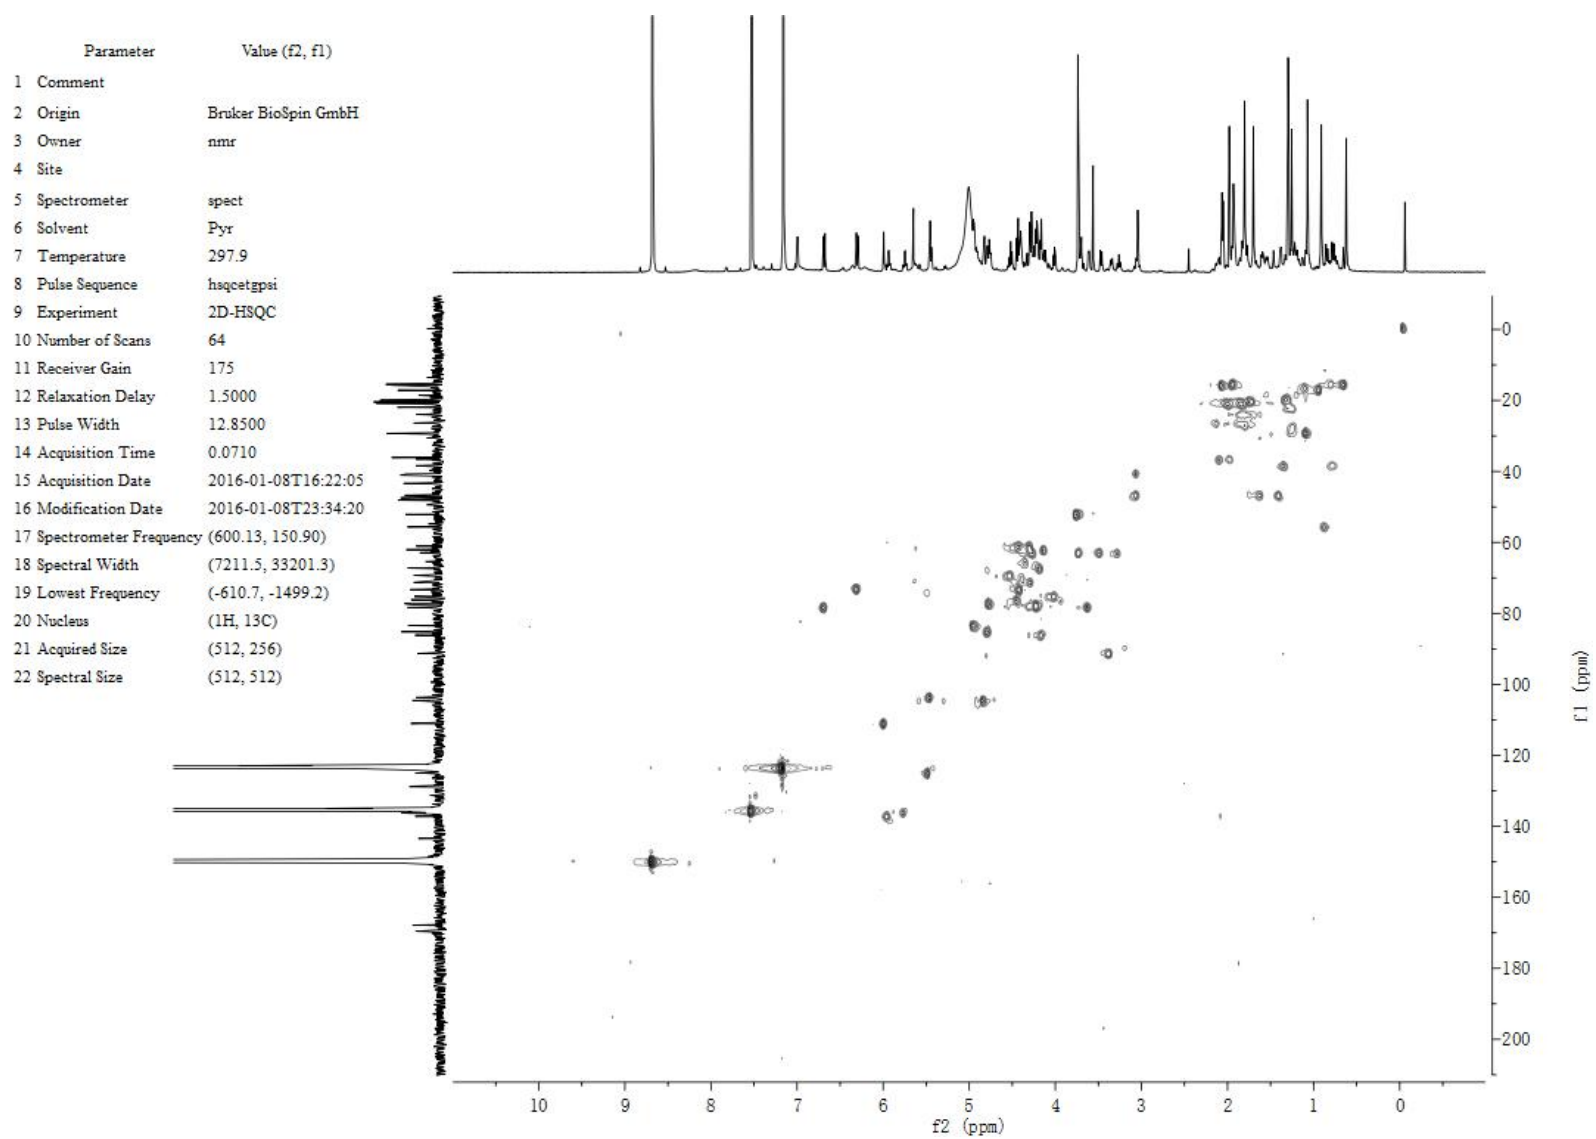

Figure S39. IR Spectrum of 6'-methylster-O-Xanifolia-Y2 (6).

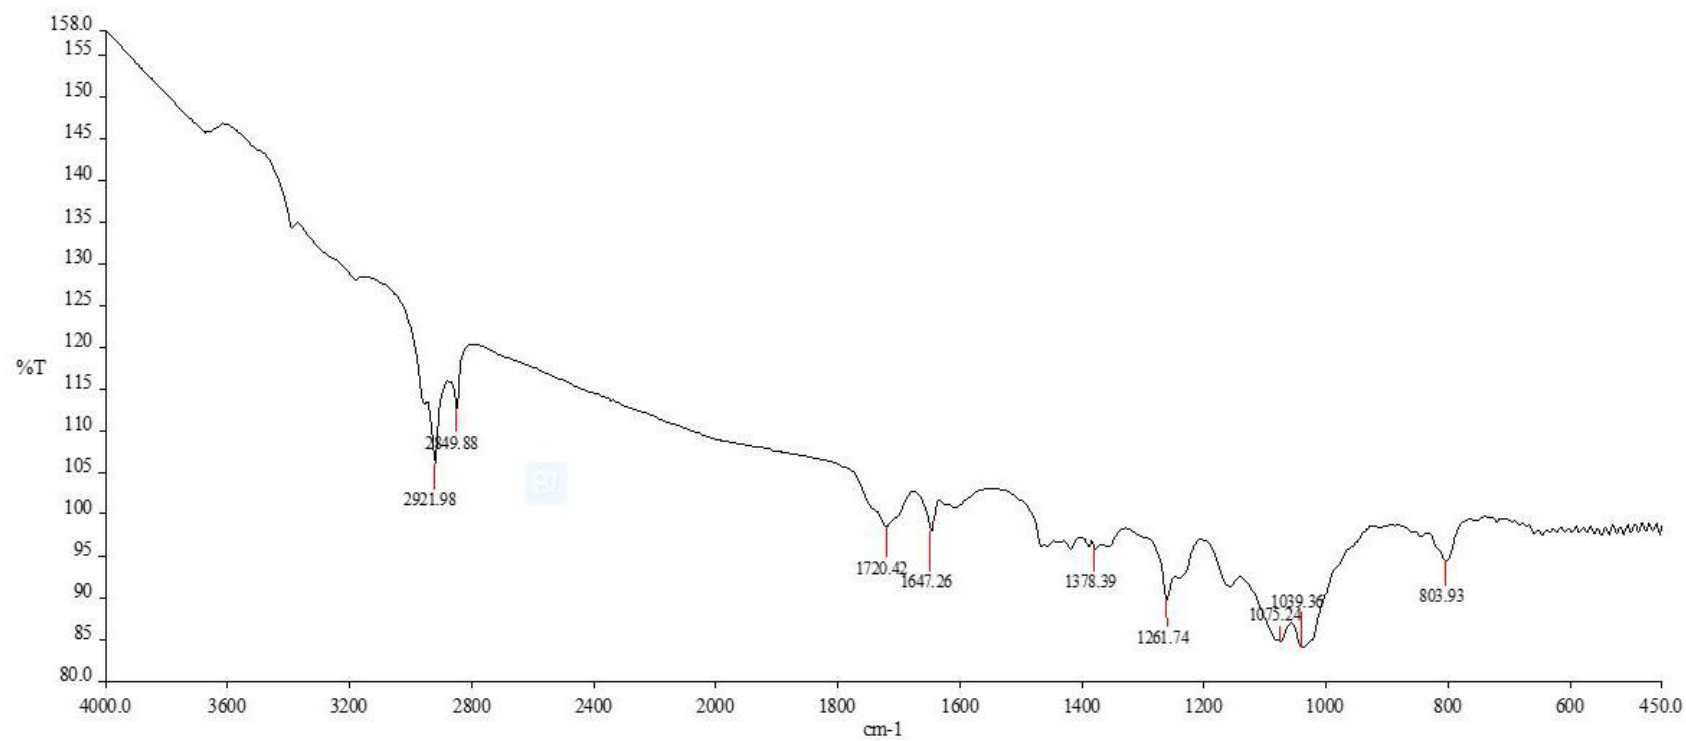

Figure S40. <sup>1</sup>H-NMR Spectrum of 6'-methylester-O-Xanifolia-Y8 (7) in C<sub>5</sub>D<sub>5</sub>N.

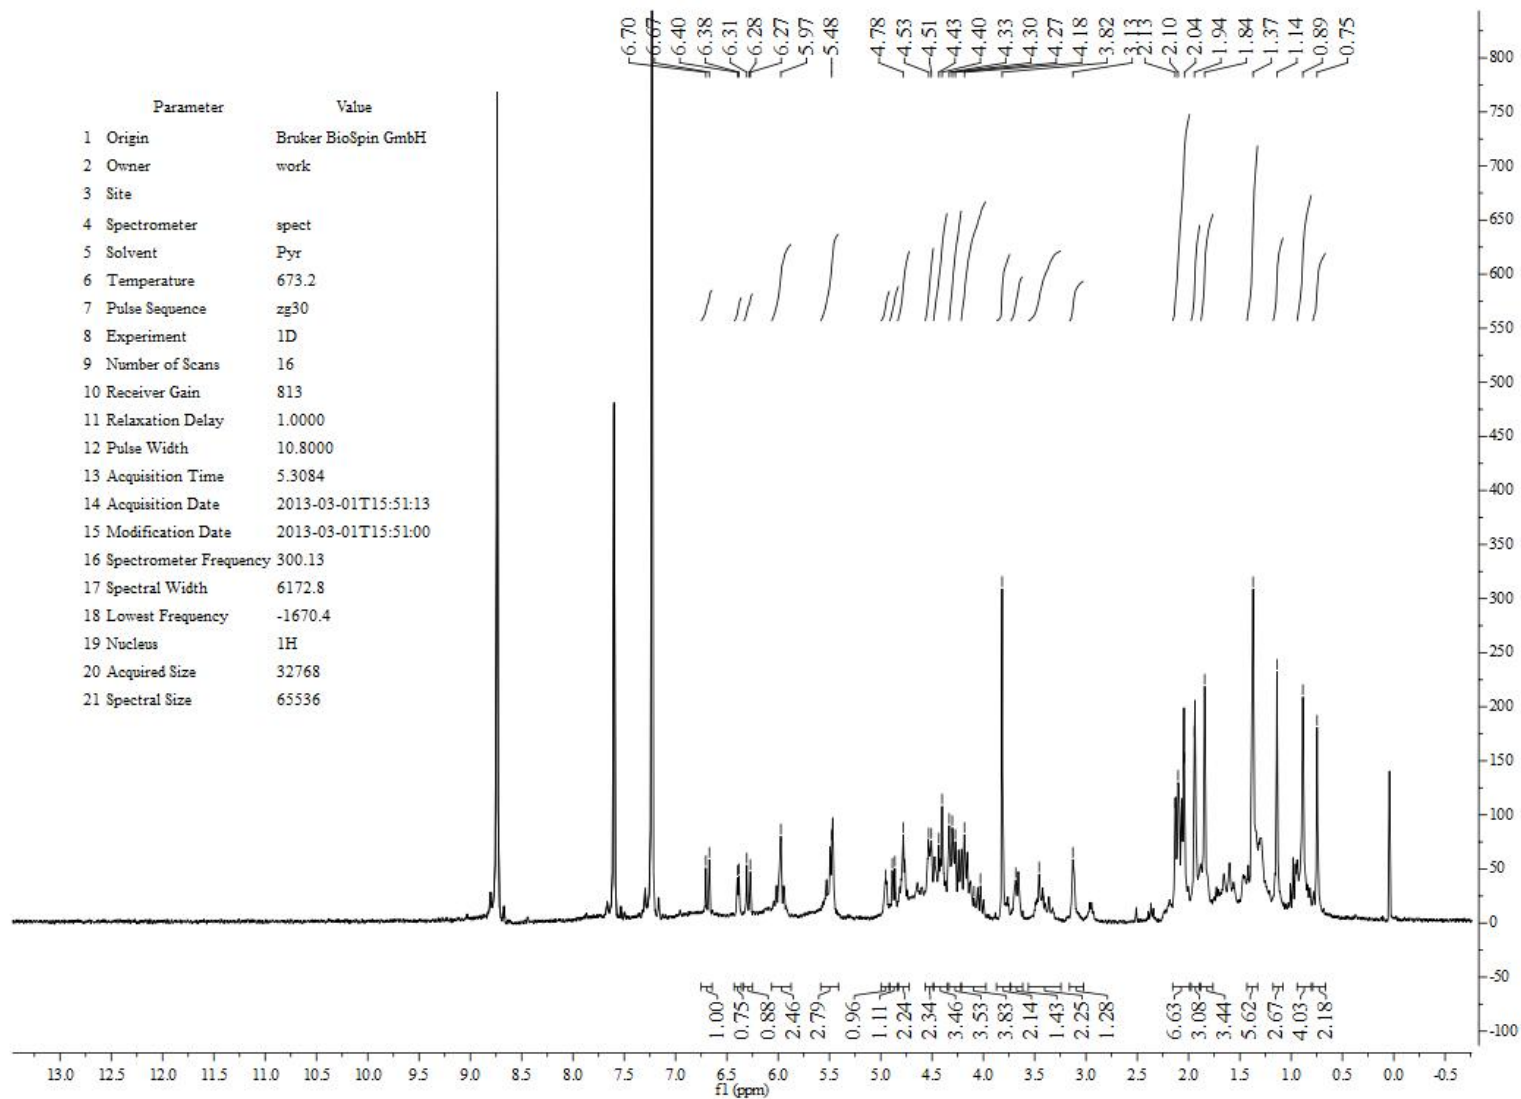

Figure S41.  $^{13}\text{C}$ -NMR Spectrum of 6'-methylster-O-Xanifolia-Y8 (7) in  $\text{C}_5\text{D}_5\text{N}$ .

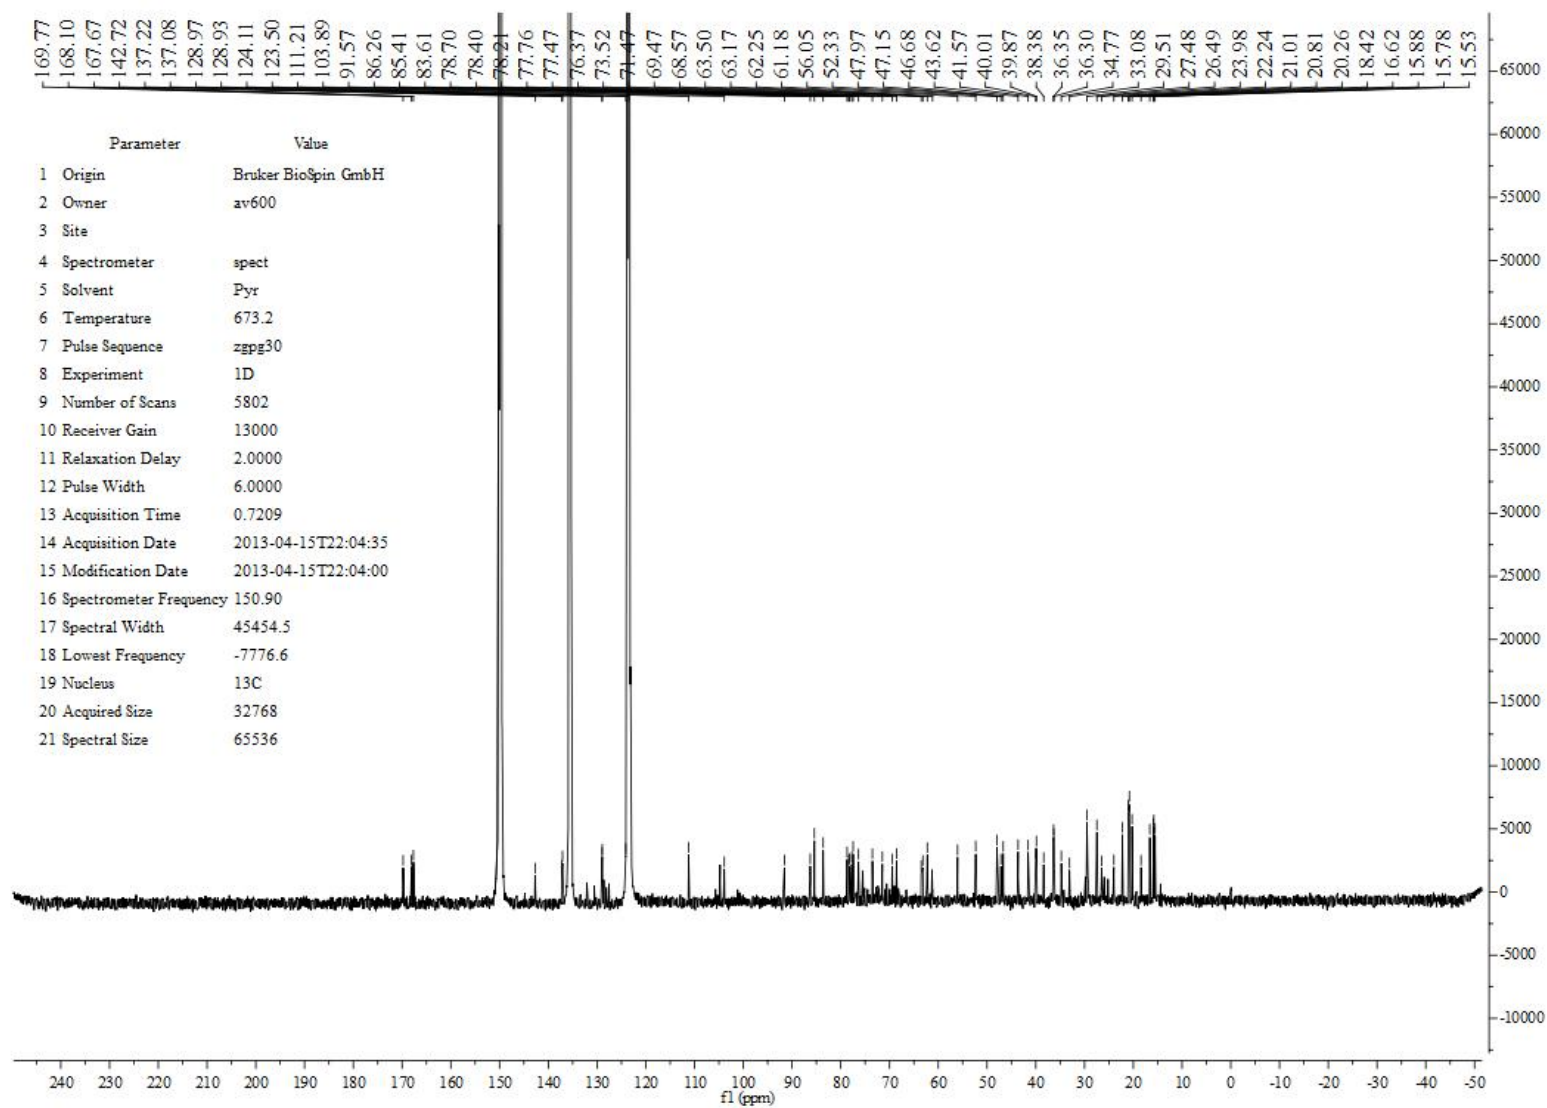

Figure S42. HR-ESI-MS Spectrum of 6'-methylester-O-Xanifolia-Y8 (7).

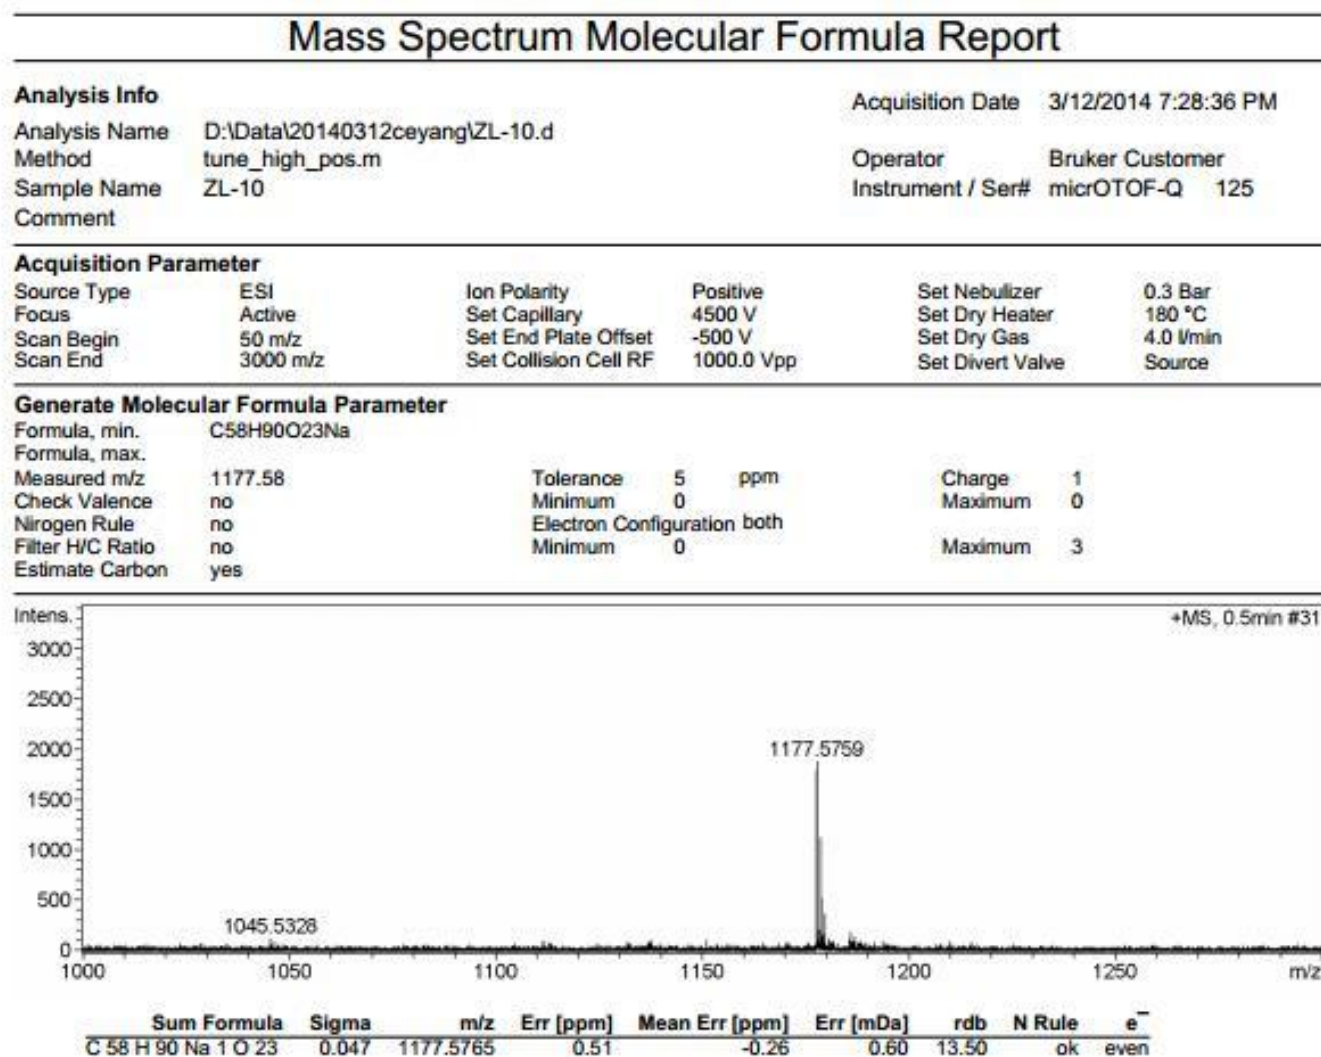

Figure S43. HMBC Spectrum of 6'-methylester-O-Xanifolia-Y8 (7) in C<sub>5</sub>D<sub>5</sub>N.

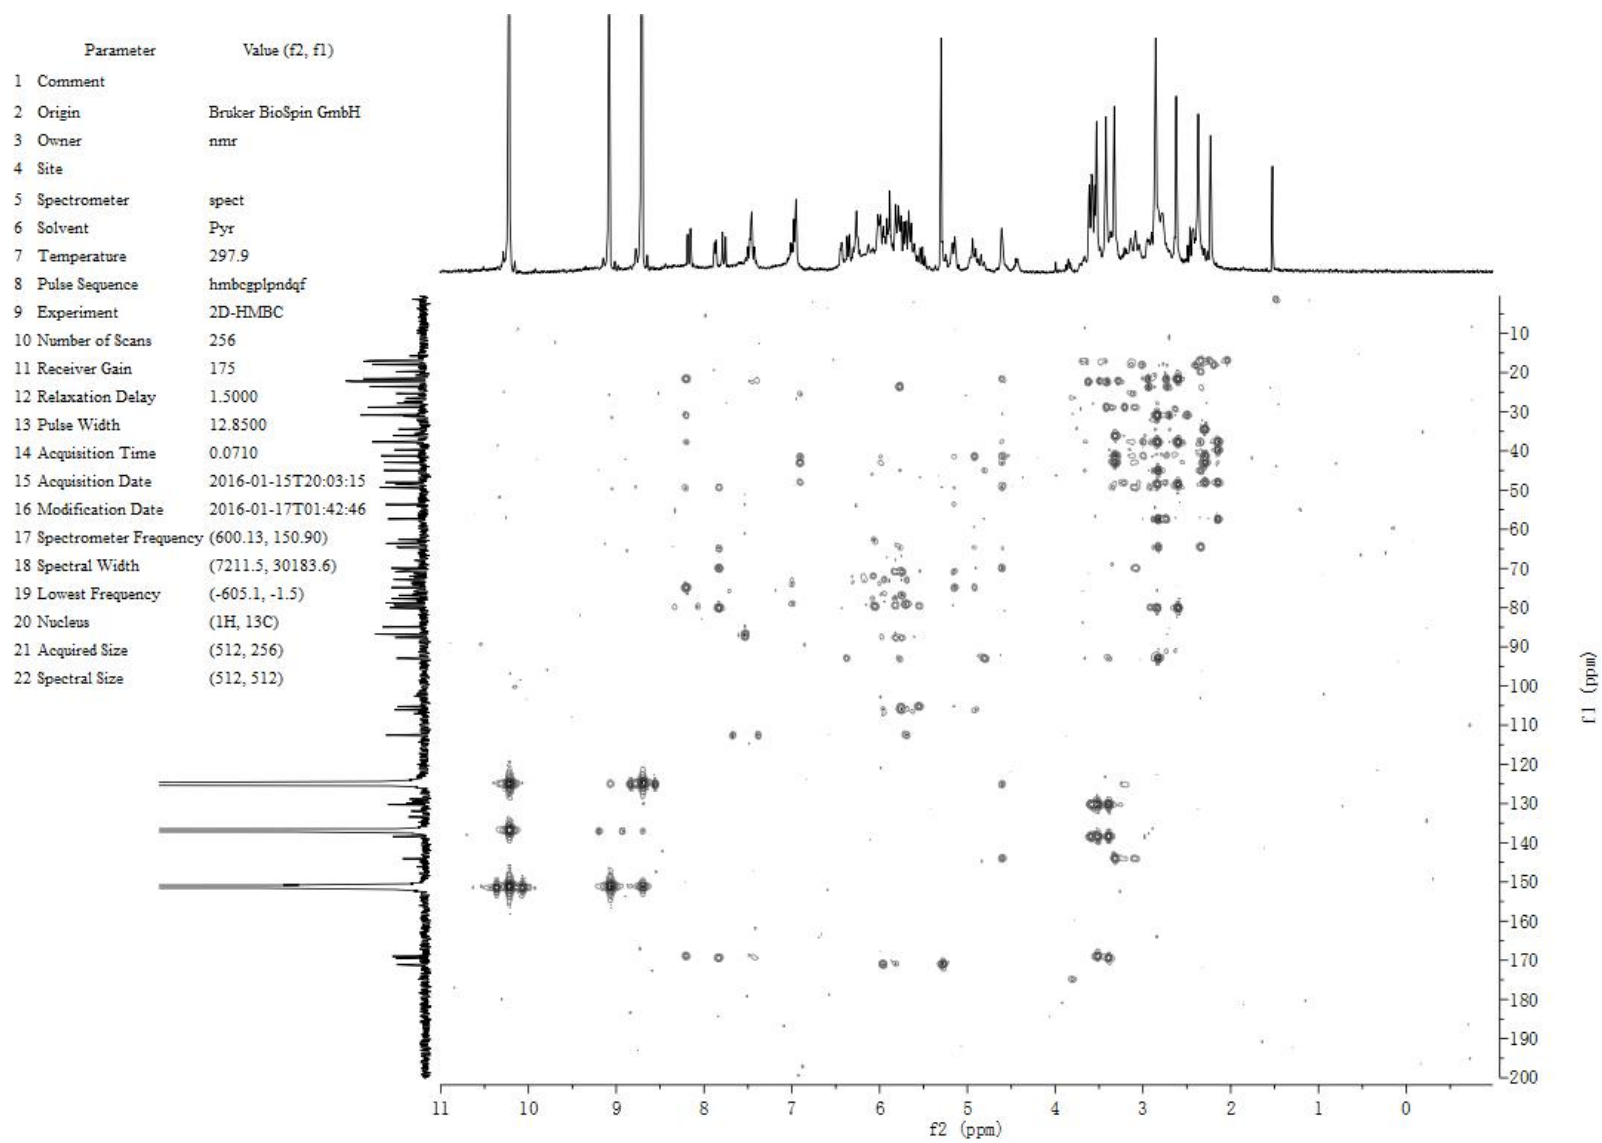



Figure S44. HSQC Spectrum of 6'-methylene-O-Xanifolia-Y8 (7) in C<sub>5</sub>D<sub>5</sub>N.

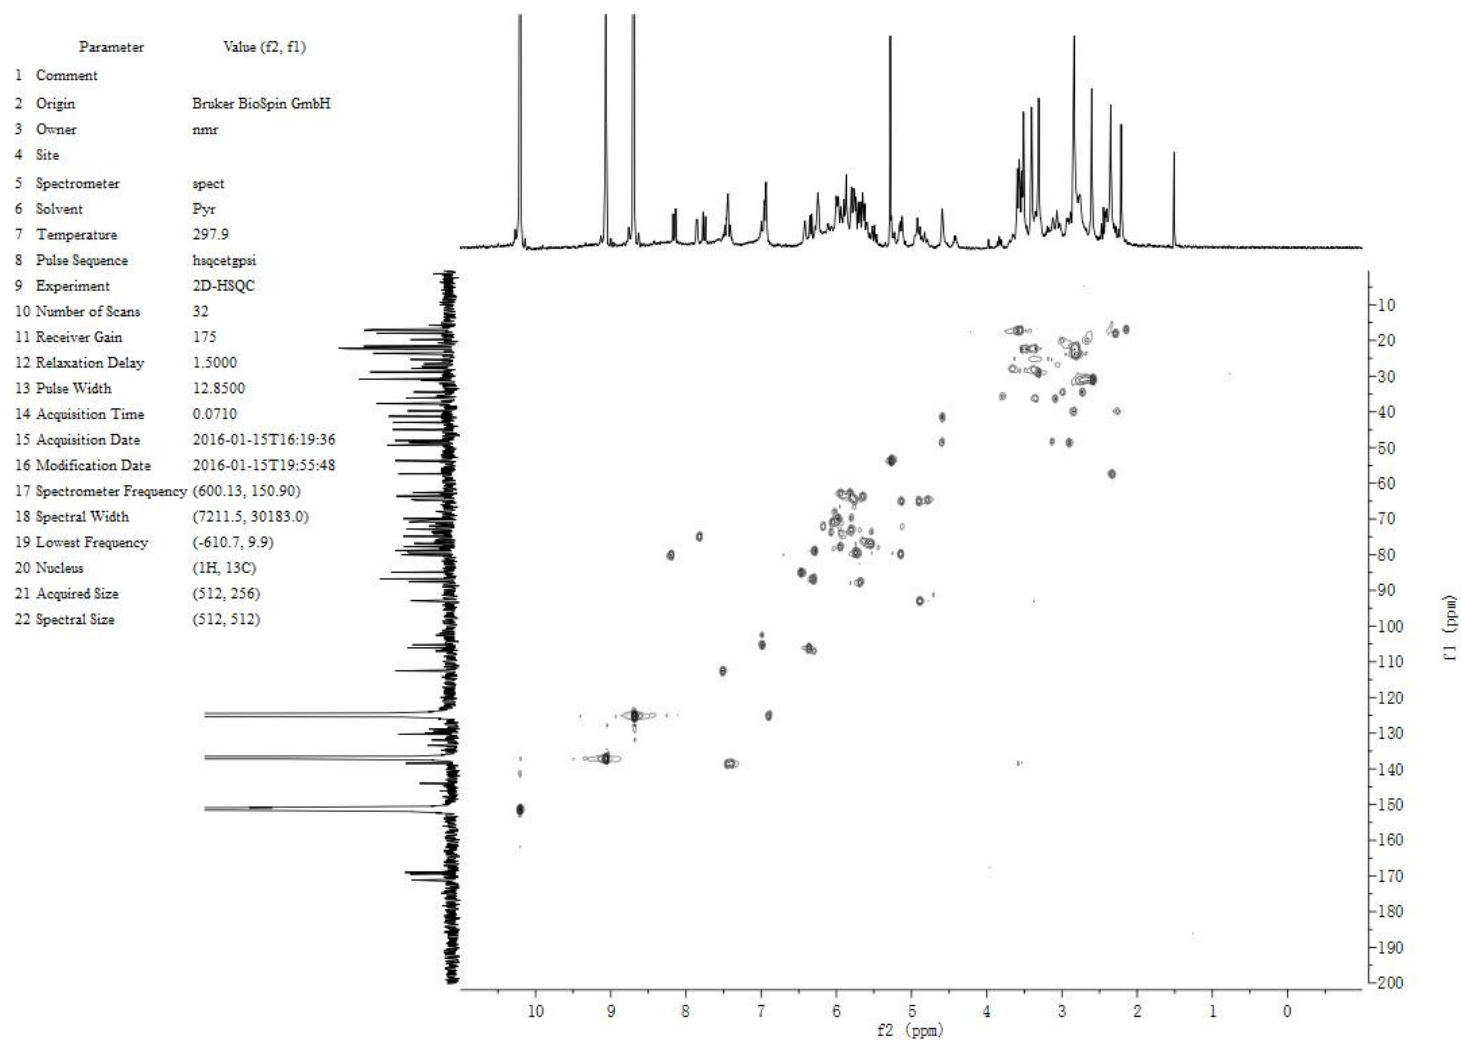

Figure S45. IR Spectrum of 6'-methylester-O-Xanifolia-Y8 (7).

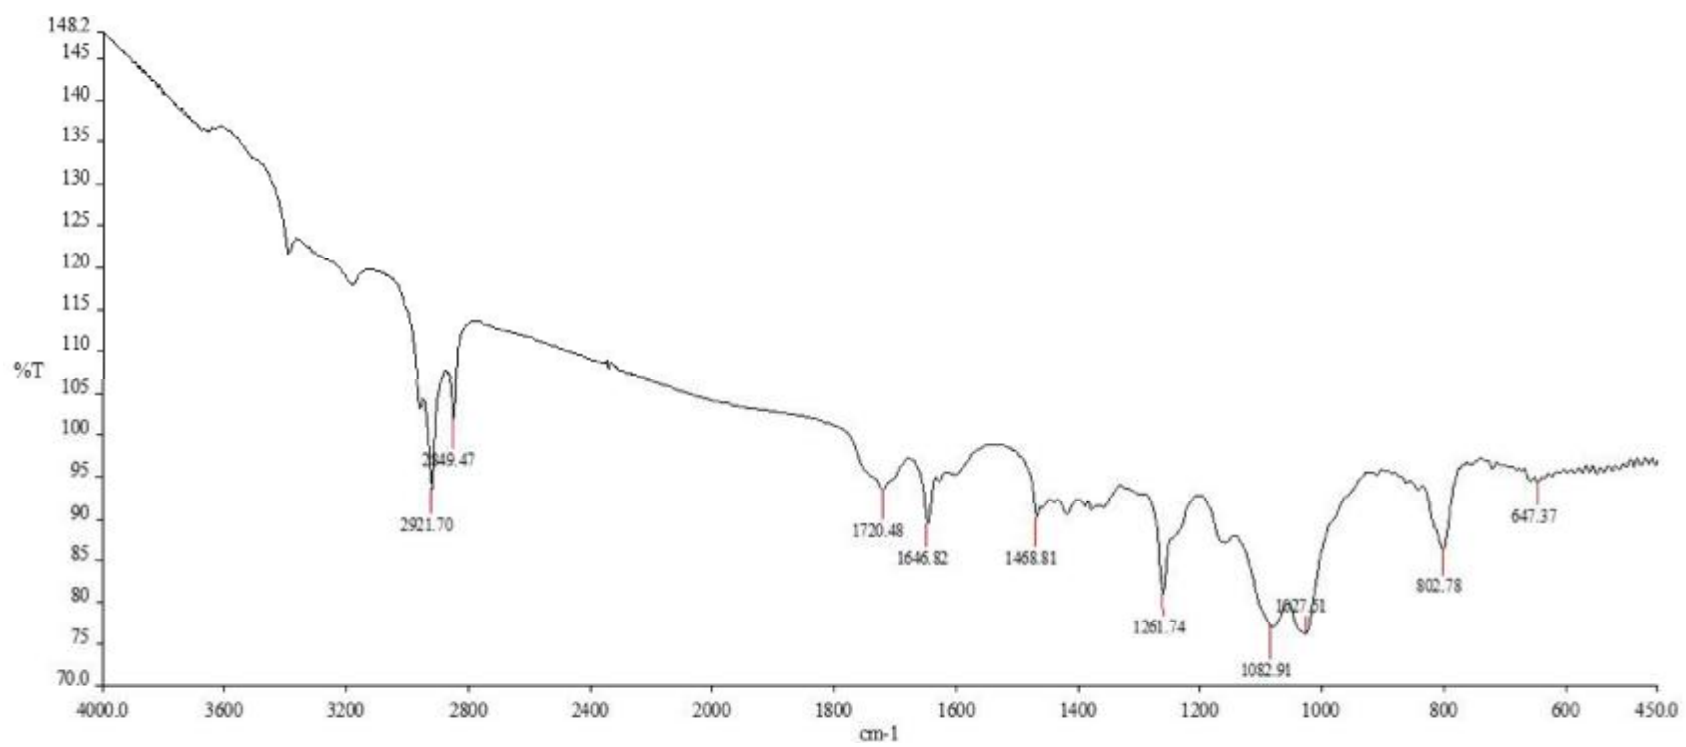

Figure S46. <sup>1</sup>H-NMR Spectrum of Xanifolia Y (8) in C<sub>5</sub>D<sub>5</sub>N.

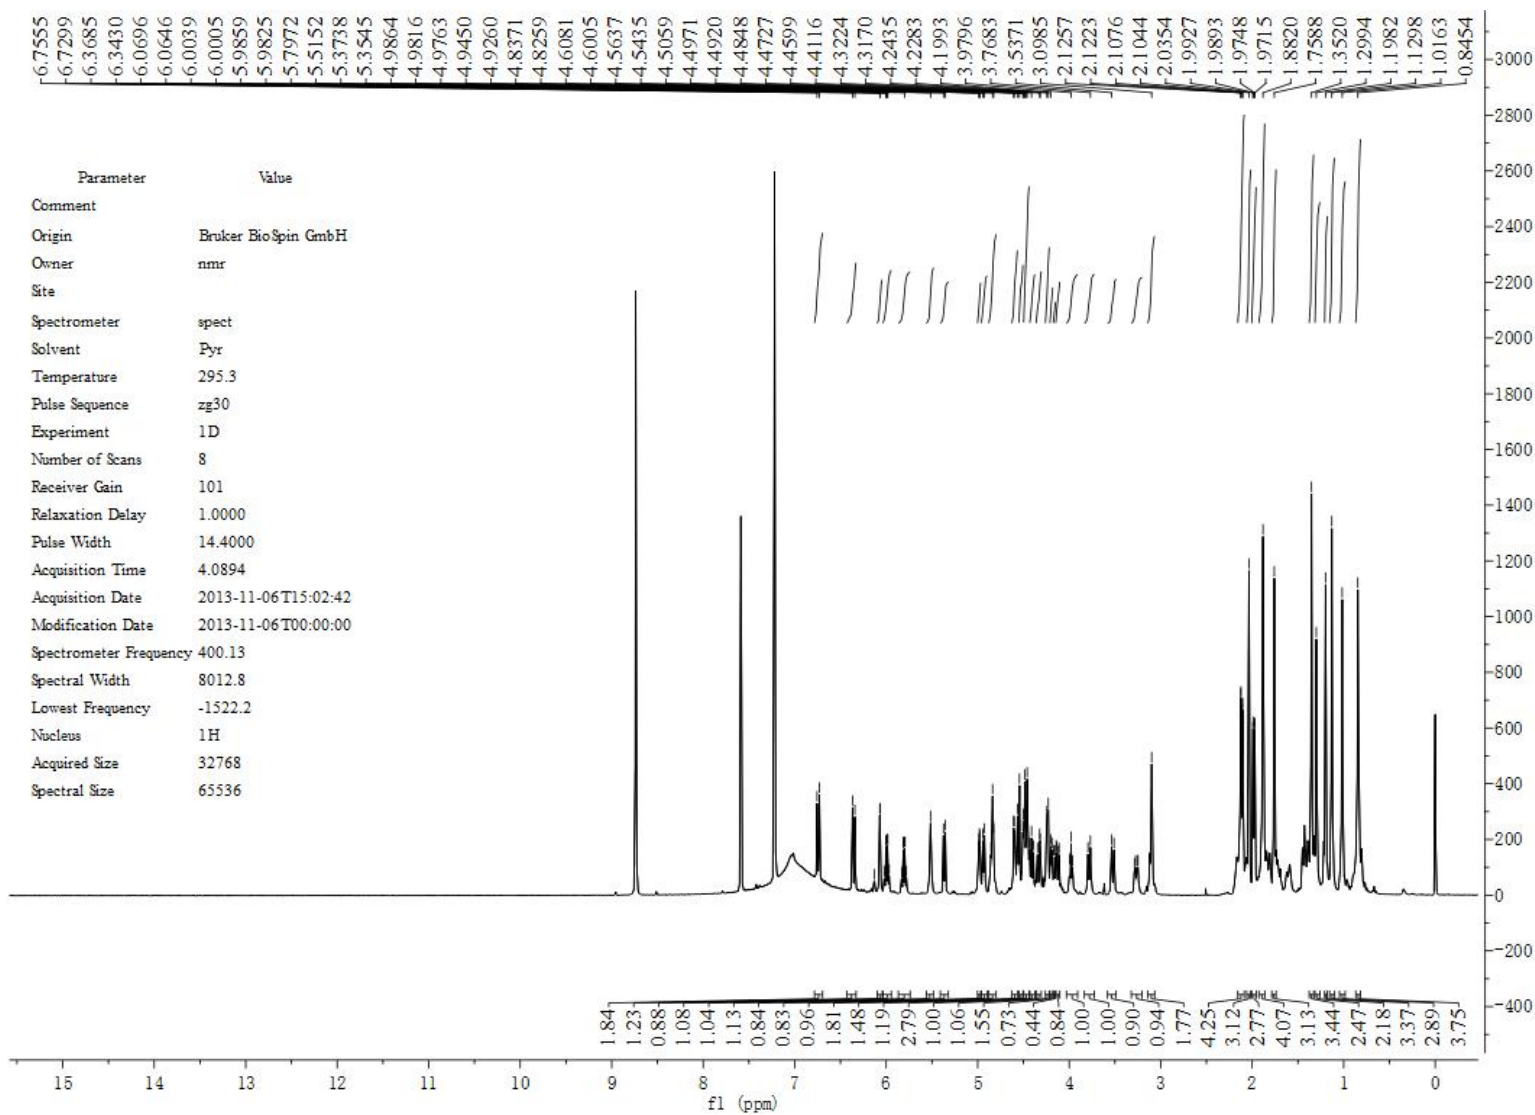

Figure S47.  $^{13}\text{C}$ -NMR Spectrum of Xanifolia Y (8) in  $\text{C}_5\text{D}_5\text{N}$ .

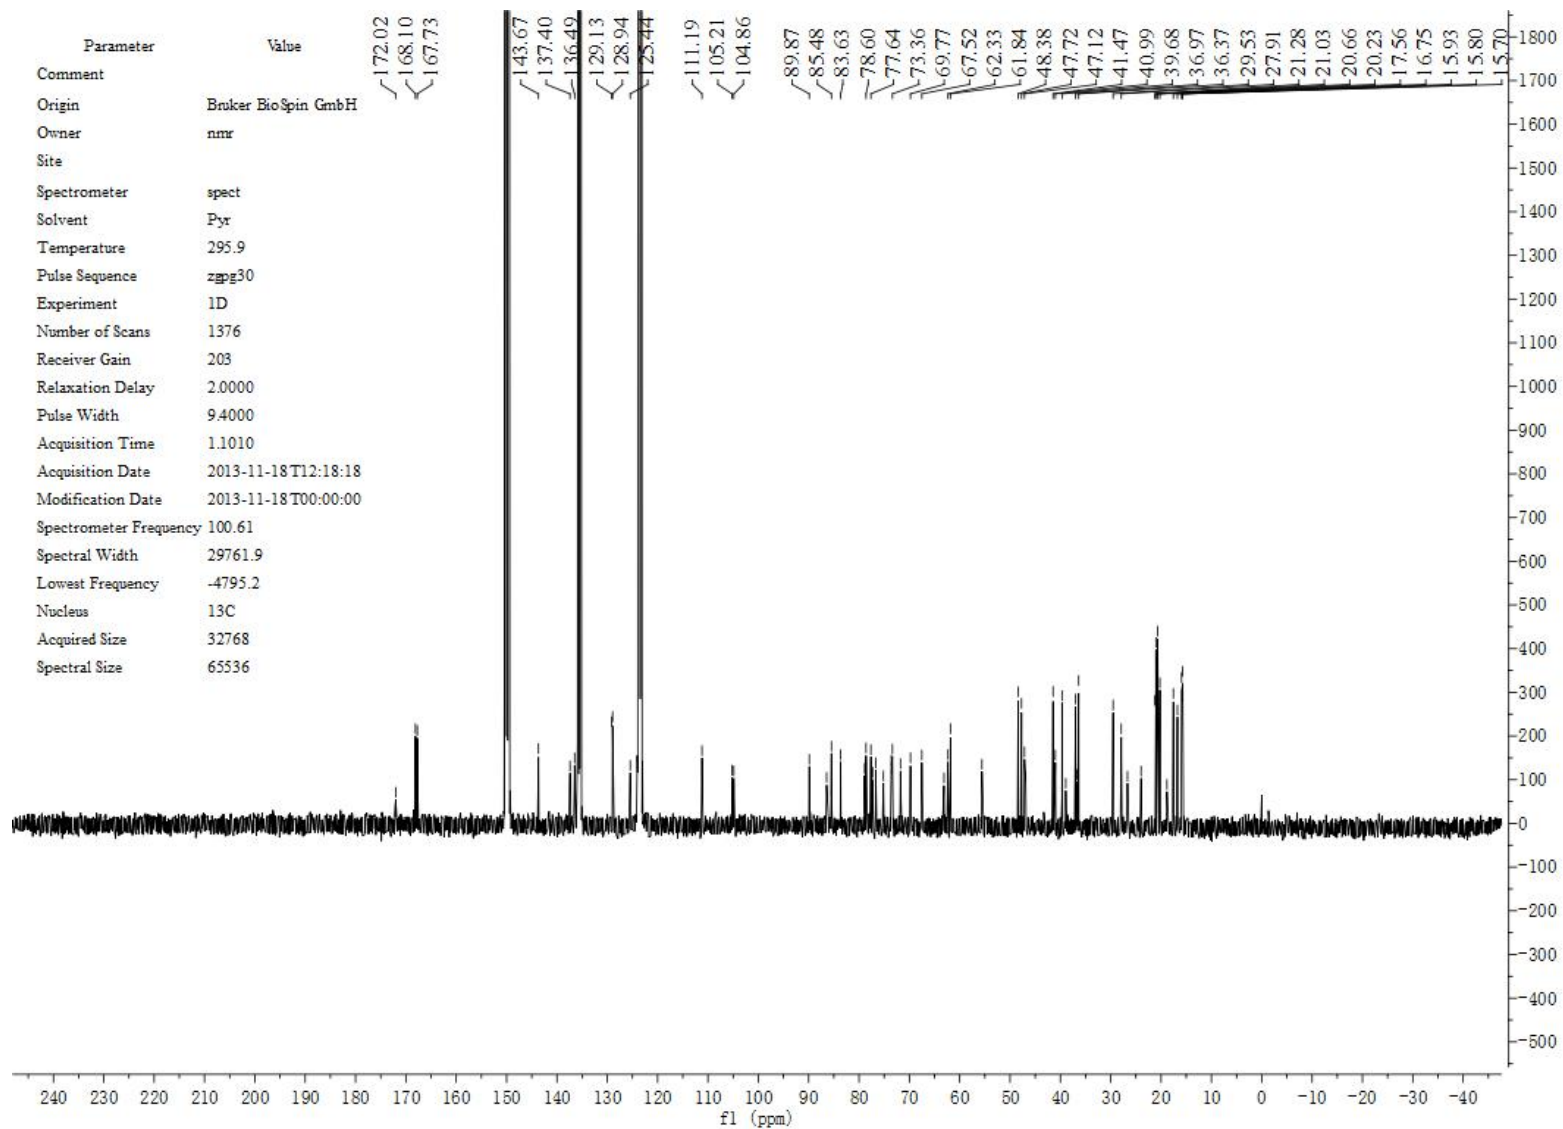

Figure S48. <sup>1</sup>H-NMR Spectrum of Xanifolia ACH-Y (9) in C<sub>5</sub>D<sub>5</sub>N.

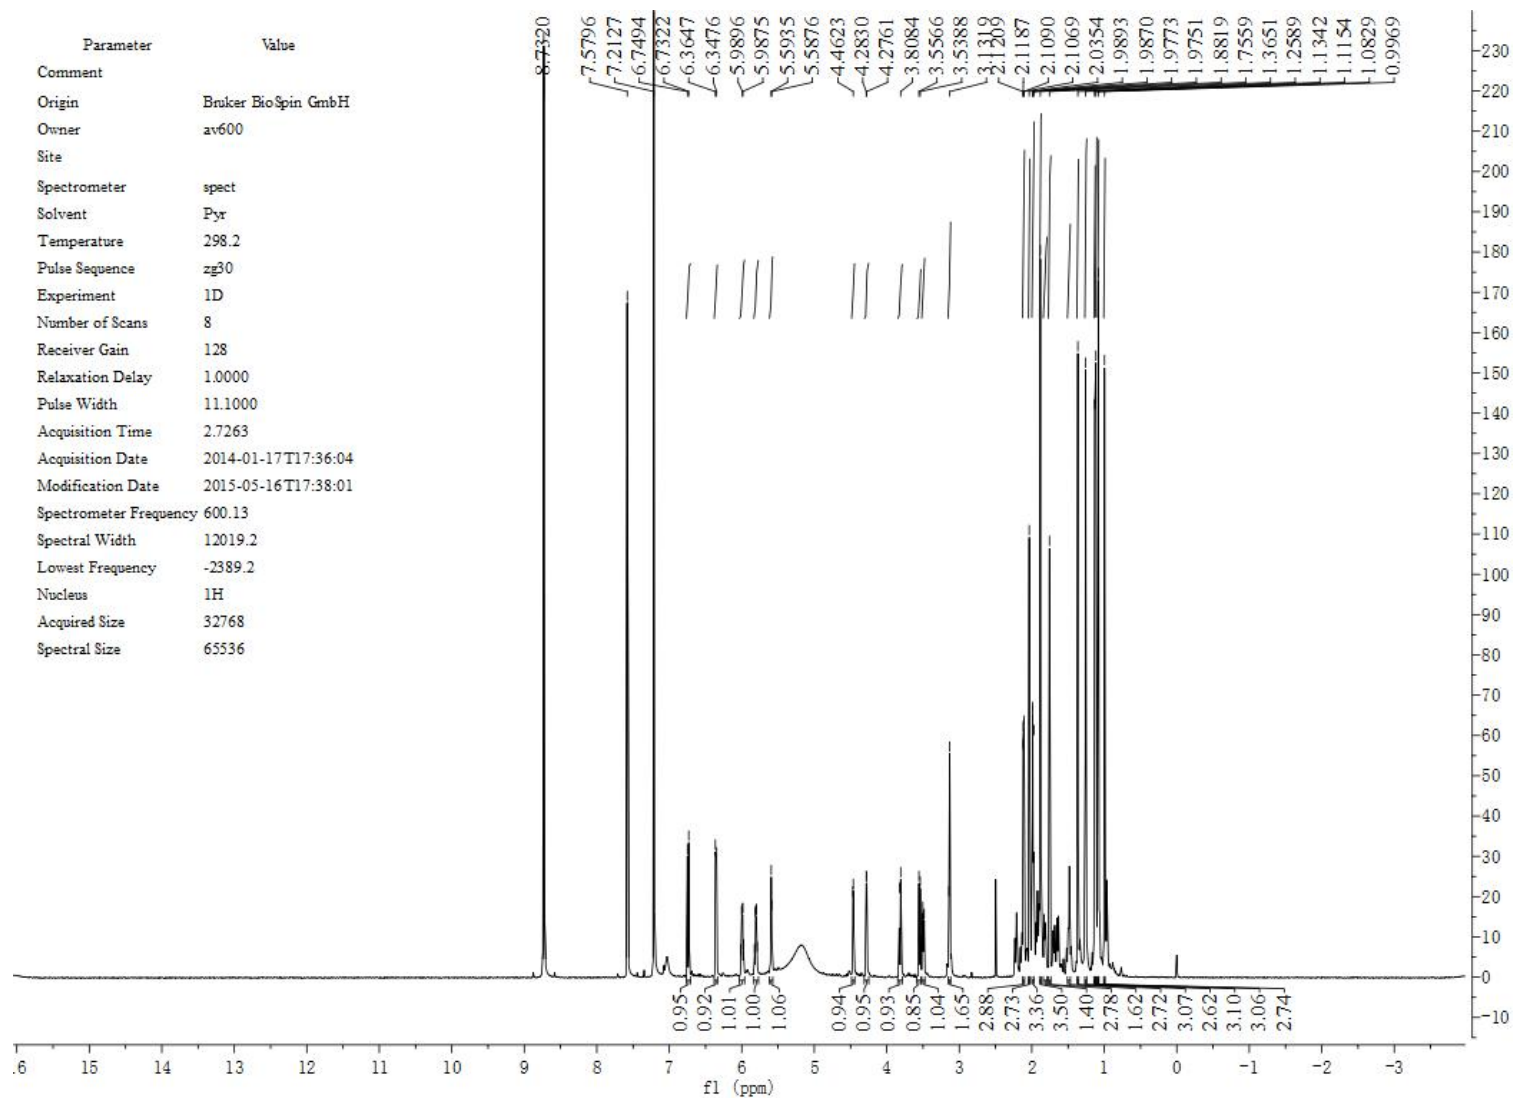

Figure S49.  $^{13}\text{C}$ -NMR Spectrum of Xanifolia ACH-Y (9) in  $\text{C}_5\text{D}_5\text{N}$ .

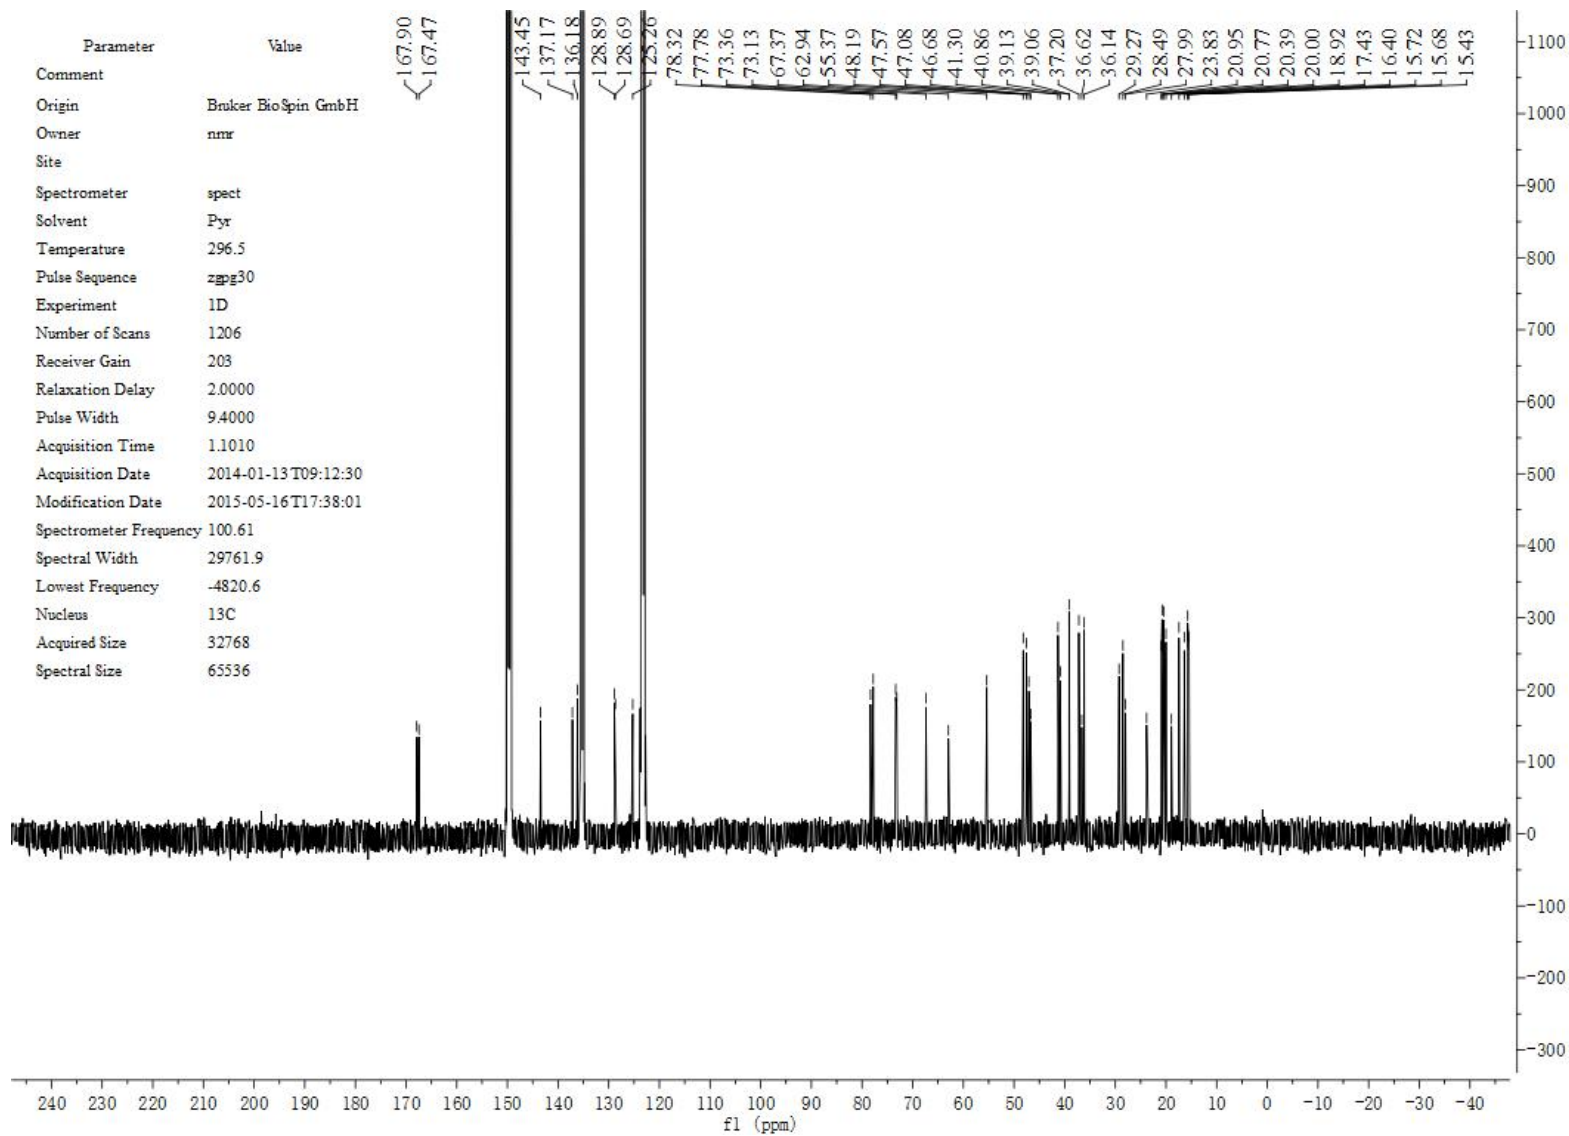

Figure S50. <sup>1</sup>H-NMR Spectrum of Xanifolia Y2 (10) in C<sub>5</sub>D<sub>5</sub>N.

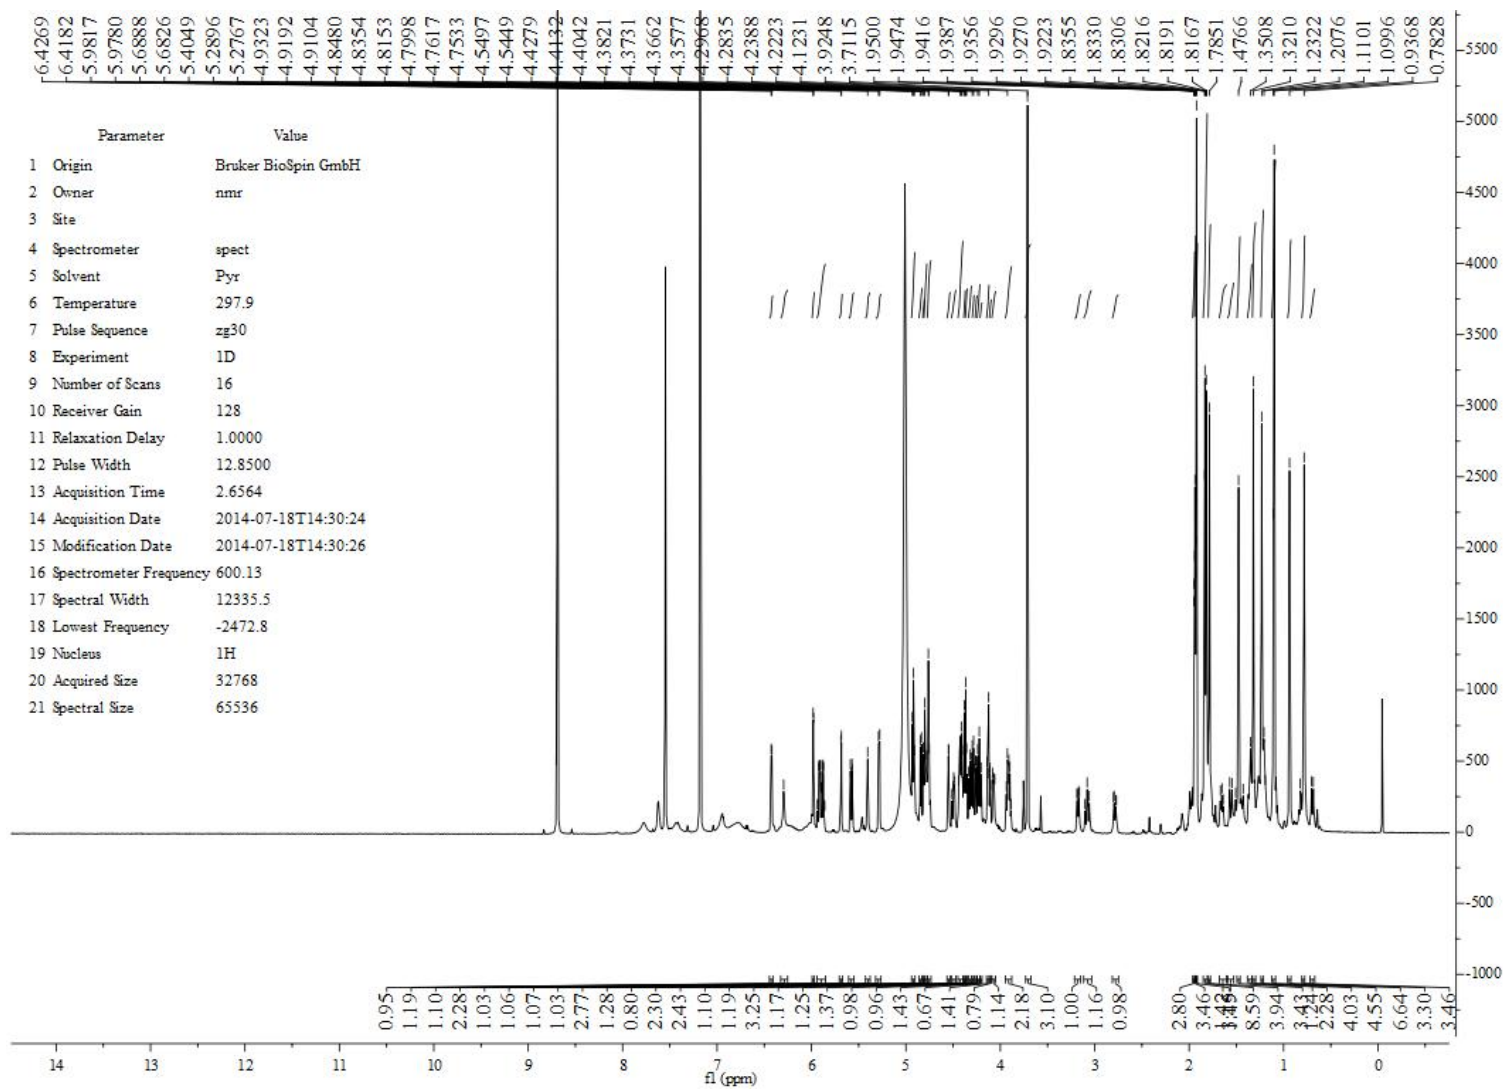



Figure S51.  $^{13}\text{C}$ -NMR Spectrum of Xanifolia Y2 (10) in  $\text{C}_5\text{D}_5\text{N}$ .

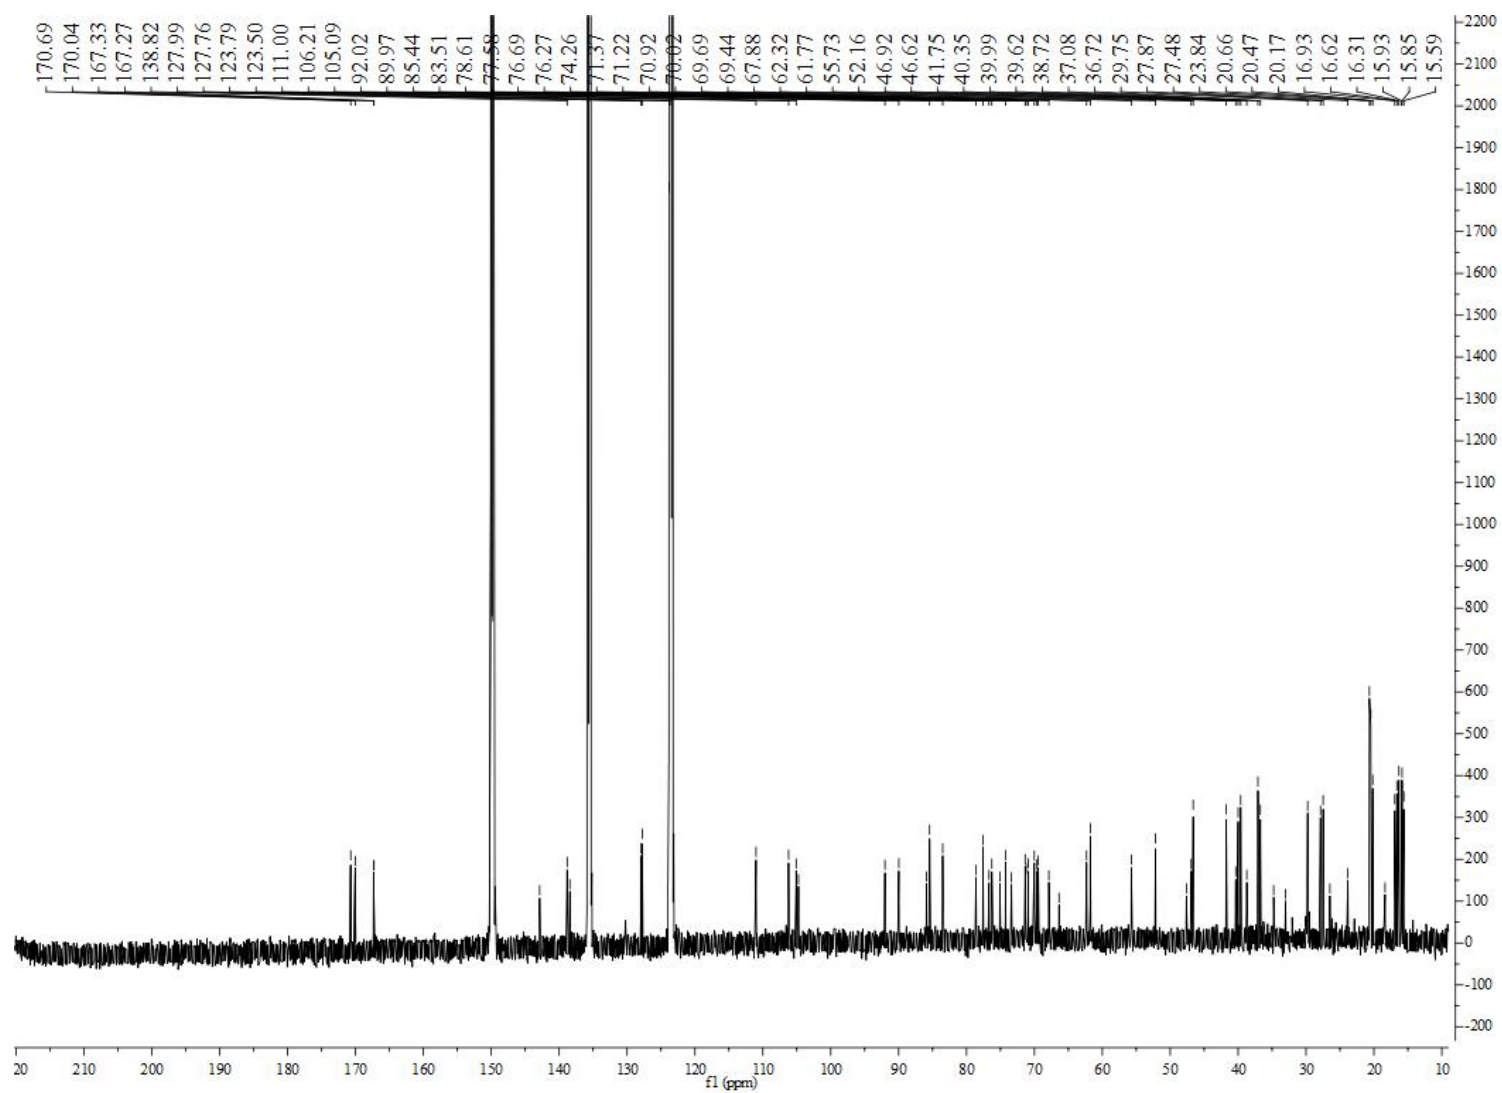

Figure S52. HR-ESI-MSSpectrum of Xanifolia Y2 (10) in C<sub>5</sub>D<sub>5</sub>N.

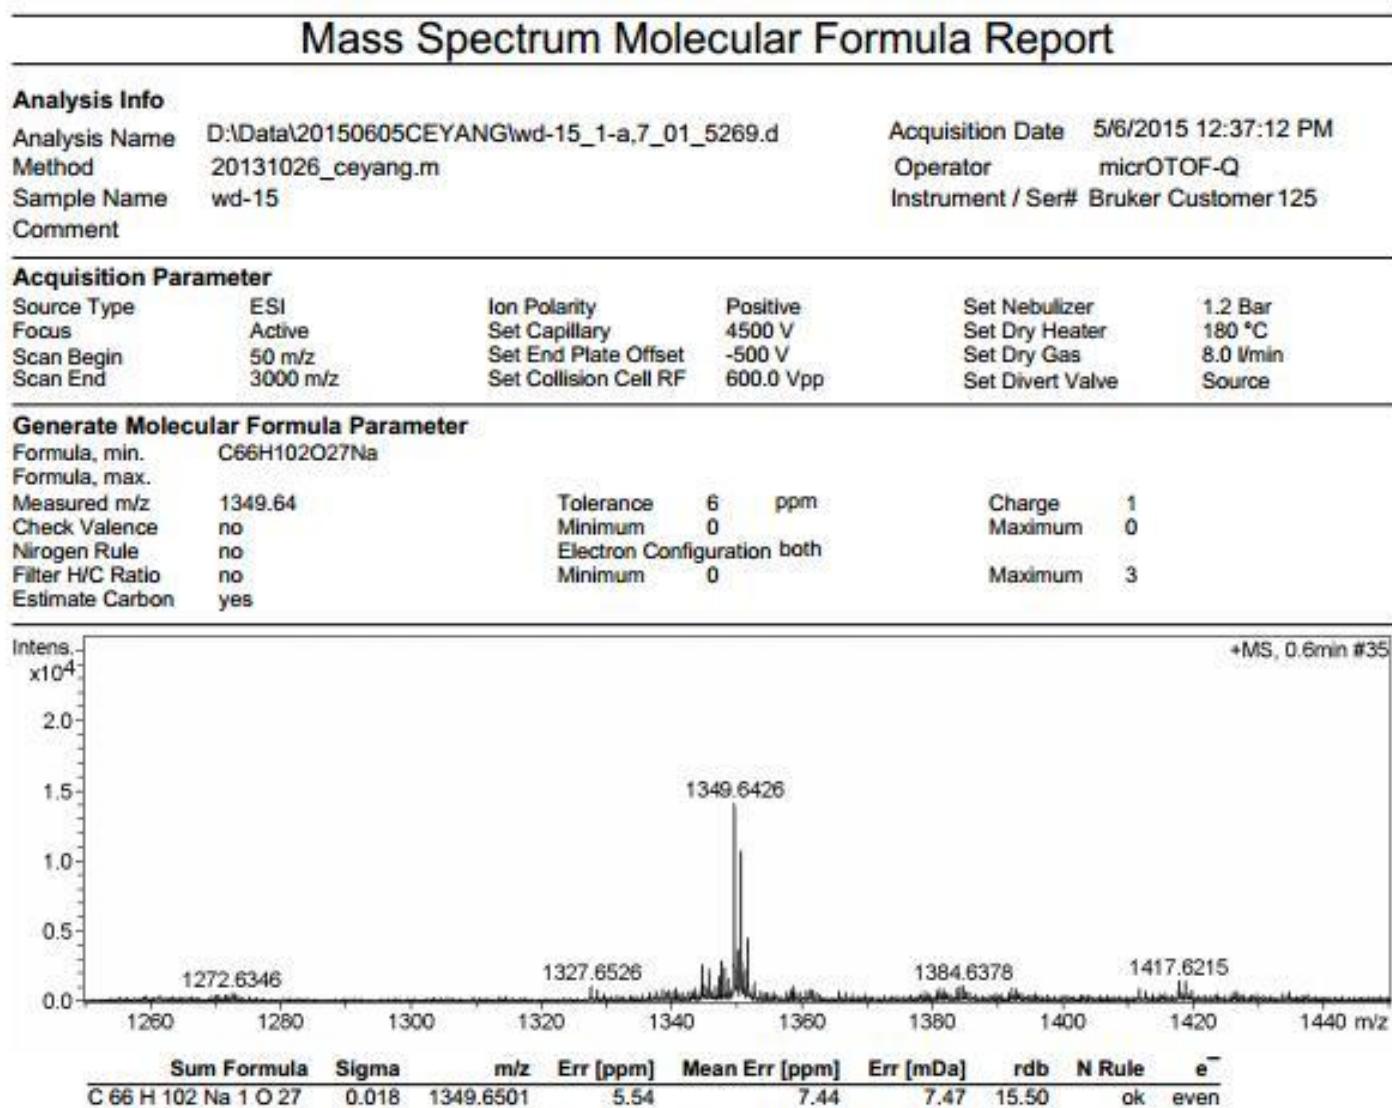

Supplement: c6ra02706g1.pdf [file c6ra02706g1.pdf]
